# Supplementary material for: Factors associated with patient activation in an Australian population with comorbid diabetes and chronic kidney disease: a cross-sectional study
Source: PubMed Central journal article supplement — BMJ Open. 2017 Oct 22;7(10):e017695. doi: 10.1136/bmjopen-2017-017695 (PMC5665291; doi:10.1136/bmjopen-2017-017695), 2017-10-22
Supplement: bmjopen-2017-017695.draft_revisions.pdf [file bmjopen-2017-017695.draft_revisions.pdf]

# BMJ Open

BMJ Open is committed to open peer review. As part of this commitment we make the peer review history of every article we publish publicly available.

When an article is published we post the peer reviewers' comments and the authors' responses online. We also post the versions of the paper that were used during peer review. These are the versions that the peer review comments apply to.

The versions of the paper that follow are the versions that were submitted during the peer review process. They are not the versions of record or the final published versions. They should not be cited or distributed as the published version of this manuscript.

BMJ Open is an open access journal and the full, final, typeset and author-corrected version of record of the manuscript is available on our site with no access controls, subscription charges or pay-per-view fees (<http://bmjopen.bmj.com>).

If you have any questions on BMJ Open's open peer review process please email [editorial.bmjopen@bmj.com](mailto:editorial.bmjopen@bmj.com)

# BMJ Open

## Factors associated with patient activation in an Australian population with comorbid diabetes and chronic kidney disease

|                                 |                                                                                                                                                                                                                                                                                                                                                                                                                                                                                                                                                                                                                                                                                                                                                                                                                                                                                                                                                                                                                                                                                                                                                                                                                                                           |
|---------------------------------|-----------------------------------------------------------------------------------------------------------------------------------------------------------------------------------------------------------------------------------------------------------------------------------------------------------------------------------------------------------------------------------------------------------------------------------------------------------------------------------------------------------------------------------------------------------------------------------------------------------------------------------------------------------------------------------------------------------------------------------------------------------------------------------------------------------------------------------------------------------------------------------------------------------------------------------------------------------------------------------------------------------------------------------------------------------------------------------------------------------------------------------------------------------------------------------------------------------------------------------------------------------|
| Journal:                        | <i>BMJ Open</i>                                                                                                                                                                                                                                                                                                                                                                                                                                                                                                                                                                                                                                                                                                                                                                                                                                                                                                                                                                                                                                                                                                                                                                                                                                           |
| Manuscript ID                   | bmjopen-2017-017695                                                                                                                                                                                                                                                                                                                                                                                                                                                                                                                                                                                                                                                                                                                                                                                                                                                                                                                                                                                                                                                                                                                                                                                                                                       |
| Article Type:                   | Research                                                                                                                                                                                                                                                                                                                                                                                                                                                                                                                                                                                                                                                                                                                                                                                                                                                                                                                                                                                                                                                                                                                                                                                                                                                  |
| Date Submitted by the Author:   | 11-May-2017                                                                                                                                                                                                                                                                                                                                                                                                                                                                                                                                                                                                                                                                                                                                                                                                                                                                                                                                                                                                                                                                                                                                                                                                                                               |
| Complete List of Authors:       | Zimbudzi, Edward; Monash University, Monash Centre for Health Research and Implementation-MCHRI, School of Public Health and Preventive Medicine; Monash Health, Department of Nephrology<br>Lo, Clement; Monash University, Monash Centre for Health Research and Implementation-MCHRI, School of Public Health and Preventive Medicine; Monash Health, Diabetes and Vascular Medicine Unit<br>Ranasinha, Sanjeeva; Monash University, Monash Centre for Health Research and Implementation-MCHRI, School of Public Health and Preventive Medicine<br>Fulcher, Gregory; Royal North Shore Hospital, Endocrinology; University of Sydney, Northern Clinical School<br>Jan, Stephen; University of Sydney, The George Institute for Global Health; University of Sydney, Sydney Medical School Westmead<br>Kerr, Peter; Monash Health, Department of Nephrology<br>Polkinghorne, Kevin; Monash Health, Nephrology<br>Russell, Grant; Monash University, School of Primary Health Care<br>Walker, Rowan; Alfred Hospital, Renal Medicine<br>Zoungas, Sophia; Monash University, . Monash Centre for Health Research and Implementation-MCHRI, School of Public Health and Preventive Medicine; University of Sydney, The George Institute for Global Health |
| <b>Primary Subject Heading</b>: | Public health                                                                                                                                                                                                                                                                                                                                                                                                                                                                                                                                                                                                                                                                                                                                                                                                                                                                                                                                                                                                                                                                                                                                                                                                                                             |
| Secondary Subject Heading:      | Patient-centred medicine, Renal medicine, Diabetes and endocrinology                                                                                                                                                                                                                                                                                                                                                                                                                                                                                                                                                                                                                                                                                                                                                                                                                                                                                                                                                                                                                                                                                                                                                                                      |
| Keywords:                       | Patient activation, diabetes, chronic kidney disease, self-care, health related quality of life                                                                                                                                                                                                                                                                                                                                                                                                                                                                                                                                                                                                                                                                                                                                                                                                                                                                                                                                                                                                                                                                                                                                                           |
|                                 |                                                                                                                                                                                                                                                                                                                                                                                                                                                                                                                                                                                                                                                                                                                                                                                                                                                                                                                                                                                                                                                                                                                                                                                                                                                           |

SCHOLARONE™  
Manuscripts

1  
2  
3 **Factors associated with patient activation in an Australian population with comorbid**  
4 **diabetes and chronic kidney disease**  
5  
6  
7

8  
9 Edward Zimbudzi<sup>1,2</sup>, Clement Lo<sup>1,3</sup>, Sanjeeva Ranasinha<sup>1</sup>, Gregory Fulcher<sup>4</sup>, Stephen  
10 Jan<sup>5,6</sup>, Peter G Kerr<sup>2</sup>, Kevin R. Polkinghorne<sup>2</sup>, Grant Russell<sup>7</sup>, Rowan G. Walker<sup>8</sup>, and  
11 Sophia Zoungas<sup>1,3,5</sup>  
12  
13

14  
15  
16  
17 1. Monash Centre for Health Research and Implementation-MCHRI, School of Public Health and  
18 Preventive Medicine, Monash University, Melbourne, VIC, Australia

19  
20 2. Department of Nephrology, Monash Health, Melbourne, VIC, Australia

21  
22 3. Diabetes and Vascular Medicine Unit, Monash Health, Melbourne, VIC, Australia

23  
24 4. Department of Diabetes and Endocrinology, Royal North Shore Hospital, St Leonards, New South  
25 Wales, Australia  
26  
27

28  
29 5. The George Institute for Global Health, University of Sydney, Sydney, NSW, Australia

30  
31 6. Sydney Medical School Westmead, University of Sydney, Sydney, NSW, Australia

32  
33 7. School of Primary Health and Allied Health Care, Monash University, Melbourne, VIC, Australia

34  
35 8. Department of Renal Medicine, Alfred Hospital, Melbourne, VIC, Australia  
36  
37  
38  
39  
40  
41

42 **Corresponding Author**

43 Prof Sophia Zoungas

44  
45 Monash Centre for Health Research and Implementation

46  
47 School of Public Health and Preventive Medicine, Monash University

48  
49 43-51 Kanooka Grove, Clayton, VIC 3168, Australia

50  
51 Tel.: +61 3 9594 7500; fax: +61 3 9594 7554

52  
53 E-mail address: sophia.zoungas@monash.edu  
54

55 Abstract word count:250

56  
57 Main text word count: 2473  
58  
59  
60

## Abstract

**Objective** To evaluate the extent of patient activation and factors associated with activation in adults with co-morbid diabetes and chronic kidney disease (CKD).

**Design** A cross sectional study.

**Setting** Renal/diabetes clinics of four tertiary hospitals in Australia.

**Study population** Adult patients with co-morbid diabetes and CKD (eGFR <60 mL/min/1.73m<sup>2</sup>).

**Main outcome measures** Patients completed the Patient Activation Measure, the Kidney Disease Quality of Life and demographic and clinical data survey. Factors associated with patient activation were examined using chi-squared or t-tests and linear regression.

**Results** 305 patients with median age of 68 (IQR 14.8) years were studied. They were evenly distributed across socioeconomic groups, stage of kidney disease and duration of diabetes but not gender. Approximately 46% reported low activation. In patients with low activation, the symptom/problem list, burden of kidney disease and mental composite subscales scores were all significantly lower (all  $p < 0.05$ ). On multivariable analysis, factors associated with lower activation for all patients were older age, worse self-reported health in the burden of kidney disease subscale and lower self-care scores. Additionally, in men, worse self-reported health in the mental composite subscale was associated with lower activation and in women worse self-reported health scores in the symptom problem list and greater renal impairment were associated with lower activation.

**Conclusion** Levels of activation are low in patients with diabetes and CKD. Older age and worse self-reported health were associated with lower activation. This data may serve as the basis for the development of interventions needed to enhance activation and outcomes for patients with diabetes and CKD.

## Key words

Patient activation; diabetes; chronic kidney disease; self-care; health related quality of life

**Strengths and limitations of this study**

- Several biologic and non-biological patient variables were included as potential factors influencing patient activation since the factors are likely to be multifactorial.
- The study was conducted across multiple sites increasing the generalizability of the findings.
- The limitations include that our findings may not be generalised to culturally and linguistically diverse (CALD) populations.
- Cross sectional study design of the study did not permit us to assess temporal effects or to rule out the potential for reverse causality with low activation causing poor health.

## INTRODUCTION

Patient activation may be defined as the ability and willingness of patients to take on the role of managing their own health and health care<sup>1</sup> and is related to the degree that a patient participates or engages in specific health behaviours.<sup>2-4</sup> Previous studies in hypertensive patients and adults attending primary care clinics suggest that patient activation is associated with patient outcomes with those individuals with low activation being more likely to smoke,<sup>5</sup> have a higher body mass index (BMI) and less likely to achieve cholesterol and glycated haemoglobin (HbA1c) targets.<sup>6</sup> In patients with diabetes, high activation has been associated with greater engagement in exercise,<sup>7</sup> fewer hospitalisations<sup>8</sup> and improved glycaemic control.<sup>9</sup> In patients with hypertension<sup>5,10,11</sup> and chronic kidney disease (CKD),<sup>12</sup> high activation has been associated with better blood pressure control and in patients with end-stage kidney disease higher activation is likely to improve uptake of home dialysis.<sup>13</sup>

Low activation levels have been reported in 25-40% of the general population<sup>14</sup> and in patients living with chronic diseases.<sup>12,15,16</sup> However, activation levels may vary considerably depending on the severity of the chronic disease.<sup>17,18</sup> Indeed, little is known about the activation levels of patients with multiple and complex chronic diseases, including co-morbid diabetes and CKD. Among patients with diabetes and CKD, a sufficient degree of activation is required for patients to perform self-management behaviors such as blood glucose monitoring and medication self-management.<sup>19</sup> Moreover, as these patients face competing treatment demands especially when treatment recommendations for one condition conflict with or impede management of the other, or when patients prioritize one condition over another,<sup>20-22</sup> understanding the degree of patient activation becomes even more important.

1  
2  
3 Missed opportunities to enhance activation among patients with diabetes and CKD may result  
4  
5 in more rapid progression of CKD and development of associated complications.<sup>23</sup>  
6

7 Additionally, activation levels may fluctuate as the disease progresses and complications  
8  
9 arise necessitating matched changes in activation behaviour.<sup>24</sup>  
10

11  
12 Given the importance of patient activation for self-management in people with diabetes and  
13  
14 CKD and ultimately patient outcomes, it is important to establish the level of activation in  
15  
16 these patients and determine the patient and disease characteristics that influence activation.  
17

18  
19 Consequently, the purpose of the present study was to 1) examine the degree of activation of  
20  
21 patients with co-morbid diabetes and CKD and 2) identify modifiable risk factors associated  
22  
23 with activation levels in patients with co-morbid diabetes and CKD.  
24  
25  
26  
27  
28  
29

## 30 **METHODS**

### 31 32 **Study design and participants**

33  
34 A cross-sectional study was conducted (as part of a larger health care improvement study) of  
35  
36 patients attending diabetes and renal outpatient clinics of four public tertiary hospitals in  
37  
38 Victoria and New South Wales (Monash Health, Alfred Health, Royal North Shore Hospital  
39  
40 and Concord Hospital) between 2013 and December 2014. Participants were eligible if they  
41  
42 received their usual care at these hospitals and had a diagnosis of diabetes (either type 1 or  
43  
44 type 2) and chronic kidney disease stages 3 to 5 (eGFR<60 mL/min). The diagnosis of  
45  
46 diabetes followed the World Health Organisation definition<sup>25</sup> and was recorded from  
47  
48 patients' prior inpatient or outpatient contacts. Patients were recruited prospectively from  
49  
50 clinics and asked to complete a number of questionnaires which included the Diabetes Renal  
51  
52 Project Survey, the Patient Activation Measure (PAM-13) and the Kidney Disease Quality of  
53  
54  
55  
56  
57  
58  
59  
60

1  
2  
3 Life short form (KDQoL™-36) (Supplementary Appendices 1, 2 and 3). For each patient the  
4  
5 site study staff or the clinician, using standardised procedures, also completed a  
6  
7 corresponding clinical survey. All participants were provided with written informed consent  
8  
9 and 317 agreed to participate. Monash University and the respective health service ethics  
10  
11 committees approved the study.  
12

### 13 14 15 **Demographic and clinical variables**

16  
17 Age, gender, socio-economic status (SES), stage of kidney disease, duration of kidney  
18  
19 disease and duration of diabetes were all recorded as possible determinants of patient  
20  
21 activation. Socio-economic status was estimated using the Australian Bureau of Statistics  
22  
23 data.<sup>26</sup> Postcodes were coded according to the Index of Relative Social Disadvantage (IRSD),  
24  
25 a composite measure based on selected census variables, which include income, educational  
26  
27 attainment and employment status. The IRSD scores for each postcode were then grouped  
28  
29 into quintiles for analysis, where the highest quintile comprised 20% of postcodes with the  
30  
31 highest IRSD scores (the most advantaged areas).  
32  
33

34  
35  
36 CKD stage as defined by the Kidney Disease: Improving Global Outcomes (KDIGO) was  
37  
38 used to define severity of the disease.<sup>27</sup> Duration of CKD was analysed as a continuous  
39  
40 variable. Estimated GFR was calculated using the CKD Epi formula.<sup>28</sup>  
41  
42

### 43 44 **Health Related quality of life**

45  
46 Health related quality of life was assessed using the English version of the Kidney Disease  
47  
48 and Quality of Life (KDQoL™-36) questionnaire, which is a 36-item HRQoL survey with  
49  
50 five subscales, namely the SF-12 measure of physical and mental functioning, burden of  
51  
52 kidney disease, symptom/problems list and the effects of kidney disease subscales.<sup>29</sup> Item  
53  
54 scores were summed for each scale and transformed on a scale of 0 to 100 with a higher score  
55  
56  
57  
58  
59  
60



1  
2  
3 indicating better HRQoL.<sup>28</sup> The scores of the two summary measures and the total SF-36 are  
4  
5 based on the average of the respective scale components.  
6  
7

### 8 9 **Patient activation**

10  
11  
12 A 13-item survey-based scale called the short form of the Patient Activation Measure (PAM-  
13  
14 13) that groups patients along a four-point levelling scale based on how activated patients are  
15  
16 was used to measure patient activation. It has similar reliability and validity to the 22-item  
17  
18 version across different ages, genders and health condition status.<sup>30</sup> Each item of the form  
19  
20 was scored on the 5-point Likert response scale. The raw scores were transformed from the  
21  
22 original metric to a 0–100 metric with higher scores indicating higher activation levels.  
23  
24 Patients were categorized into four levels: level 1 (score <47.0), level 2 (score 47.1–55.1),  
25  
26 level 3 (score 55.2–67.0), and level 4 (score >67.0 based on the predefined categorisation of  
27  
28 activation scores according to Hibbard and others.<sup>30</sup> The activation levels were then  
29  
30 dichotomized into low activation (Levels 1 and 2) and high activation (Levels 3 and 4) as  
31  
32 reported in previous studies.<sup>31,32</sup>  
33  
34  
35  
36  
37

### 38 **Data analysis**

39  
40 Normally distributed data are presented with mean and standard deviation (SD) as the  
41  
42 measures of central tendency and dispersion, respectively. Correspondingly, non-normally  
43  
44 distributed continuous data are presented with median and interquartile range (IQR, thus 25th  
45  
46 and 75th percentiles), respectively. All HRQoL subscales were treated as continuous  
47  
48 variables. First, the four patient activation levels were dichotomized into low activation group  
49  
50 (Levels 1 and 2) and high activation group (Levels 3 and 4). Second, chi-squared or t-tests (as  
51  
52 appropriate) were used to analyse differences or associations between patient and disease  
53  
54 characteristics and patient activation. Third, using the PAM score as a continuous variable,  
55  
56  
57  
58  
59  
60

1  
2  
3 univariable regression models were performed in which each covariate was controlled for  
4  
5 separately to ascertain its potential importance. Covariates that reached a significance level of  
6  
7  $p < 0.10$  or were of clinical importance were included in stepwise backward multivariable  
8  
9 linear regression models that investigated the factors associated with patient activation for the  
10  
11 entire study population and stratified analyses according to gender<sup>33</sup>. Confidence intervals  
12  
13 (CIs) were reported at the 95% level and results were considered significant at conventional  
14  
15  $p < 0.05$  level. All analyses were performed with IBM SPSS version 22 (Armonk, NY: IBM  
16  
17 Corp.) or Stata version 12.1 (Statacorp, College Station, TX).  
18  
19  
20  
21  
22  
23  
24

## 25 RESULTS

### 26 Patient characteristics

27  
28 The baseline demographic and clinical characteristics of the study population are shown in  
29  
30 Table 1. A total of 305 patients (30% women) were included in the analyses after exclusion  
31  
32 of 9 patients who had their eGFR misclassified ( $>60\text{ml}/\text{min}/\text{m}^2$ ) and 3 patients who had  
33  
34 incomplete PAM data. The median age and interquartile range (IQR) was 68 and 14.8 years  
35  
36 respectively with 59% of the population being over 68 years old. The patients were evenly  
37  
38 distributed across groups defined by SES and stage of kidney disease. Approximately 20%  
39  
40 were receiving dialysis treatment.  
41  
42  
43  
44  
45

46 Patient activation scores were normally distributed across the study population (mean 57.6,  
47  
48 SD 15.5); men (mean 57.4, SD 16.0) and women patients (mean 58.1, SD 14.4) (Figure 1).  
49  
50

51 The proportions of the patients with low (levels 1 and 2) and high activation (levels 3 and 4)  
52  
53 scores were 46% and 54% respectively (Figure 1).  
54  
55  
56  
57  
58  
59  
60

1  
2  
3 Patients in the low activation group had significantly worse self-reported health in the burden  
4 of kidney disease and mental composite summary subscales than patients in the high  
5 activation group (all  $p < 0.05$ ). No other differences between low and high activation groups  
6 were found for demographic factors (age, gender and socioeconomic status) and disease  
7 factors that included stage and duration of CKD, dialysis status, duration of diabetes and BMI  
8 (Table 1).  
9  
10  
11  
12  
13  
14  
15  
16

### 17 **Factors associated with patient activation in the study population**

18  
19  
20 On univariable analysis (Table 2), factors associated with lower activation were worse self-  
21 reported health in all HRQOL subscales, greater renal impairment (lower eGFR) and lower  
22 self-care scores. On multivariable analysis, older age, worse self-reported health in the  
23 burden of kidney disease subscale and lower self-care scores were independently associated  
24 with lower activation (Table 2).  
25  
26  
27  
28  
29  
30  
31

### 32 **Factors associated with patient activation stratified by gender**

33  
34 Tables S1 and S2 show stratified analyses according to gender. On univariable analysis,  
35 worse self-reported health in the symptom problems list, burden of kidney disease, mental  
36 composite summary subscales and lower self-care scores were associated with lower  
37 activation in men and worse self-reported health in all HRQOL subscales and lower eGFR  
38 were associated with lower activation in women. On multivariable analysis, worse self-  
39 reported health in the mental composite subscale was independently associated with lower  
40 activation in men, and worse self-reported health in the symptom problem list and greater  
41 renal impairment (lower eGFR) were independently associated with lower activation in  
42 women.  
43  
44  
45  
46  
47  
48  
49  
50  
51  
52  
53  
54  
55  
56  
57  
58  
59  
60

## DISCUSSION

Amongst patients with co-morbid diabetes and CKD, we document for the first time in this study that patient activation is low, and identify factors independently associated with lower patient activation. We report significantly worse self-reported health in the burden of kidney disease and mental composite subscales for patients in the low activation group compared to those in the high activation group. Lower activation was also independently associated with older age, having worse self-reported health in the burden of kidney disease subscale and lower self-care scores across the entire study population. In men, worse self-reported health in the mental composite subscale was associated with lower activation, and in women worse self-reported health in the symptom problem list and greater renal impairment were associated with lower patient activation.

Patient activation in patients with co-morbid diabetes and CKD was generally low with close to 50% of our study population reporting low levels of activation. This is greater than that of the general population where 25 to 40% have reported low activation<sup>14</sup> and in patients with diabetes where 20 to 30% reported low activation.<sup>33,34</sup> Conversely in patients with CKD alone (eGFR<60 mL/min/1.73m<sup>2</sup>), patient activation has been observed to be even lower with over 65% of one study cohort<sup>17</sup> reporting low activation levels. The attenuating effect of diabetes on patient activation in patients with CKD may be related to the focus on patient self-management in diabetes fostering greater patient activation. This suggests the tenet of diabetes management being patient self-management may foster greater patient activation. More studies are required to confirm this observation.

We found that older age was independently associated with lower activation. Similar findings have been reported in people with diabetes<sup>8, 16, 26</sup> other chronic diseases<sup>32, 35-38</sup> and in a national survey of US adults.<sup>39</sup> In contrast, other studies in different populations found

1  
2  
3 conflicting evidence, showing no direct relationship between patient activation and age.<sup>2, 40-42</sup>

4  
5 These inconsistencies may be due to differences in clinical and demographic characteristics  
6  
7 of the populations studied. For example, it has been previously reported that younger patients  
8  
9 with CKD have poor coping strategies compared to older patients<sup>43</sup> and this may potentially  
10  
11 lead to low activation. Our results highlight a subgroup at risk of lower activation, which may  
12  
13 benefit from targeted interventions to improve activation. Additionally, the contradictions  
14  
15 regarding the relationship between age and patient activation highlight that intervention  
16  
17 strategies cannot exclusively be based on the knowledge of patients' demographics, but  
18  
19 should include other modifiable factors as well.  
20  
21

22  
23  
24 In line with previous studies of patients with conditions other than co-morbid diabetes and  
25  
26 CKD,<sup>15, 36, 39, 44-46</sup> patient activation was low in those with worse self-reported health status.  
27  
28 Our study showed that lower mental health composite scores on KDQoL were independently  
29  
30 associated with lower patient activation, particularly in men. This could be due to men with  
31  
32 co-morbid disease having less ability to cope with multiple conditions than women,<sup>47</sup>  
33  
34 resulting in lower levels of activation. Given the high prevalence of mental disorders such as  
35  
36 depression in patients with CKD,<sup>48</sup> addressing mental health issues may be very important  
37  
38 for enhancing patient activation and outcomes.  
39  
40

41  
42 Our data suggest that greater renal impairment in women may be associated with lower  
43  
44 activation. The most likely explanation for this is that women tend to have lower physical  
45  
46 functioning<sup>49, 50</sup> even in early stages of CKD which is associated with low patient activation.  
47  
48  
49  
50  
51  
52  
53  
54  
55  
56  
57  
58  
59  
60  
17, 39 Another plausible explanation is that women may receive less support from their care  
givers compared to men due to caregiver stress and fatigue<sup>51</sup> associated with managing  
chronic diseases leading to lower activation.

1  
2  
3 Interestingly, we did not find a significant association between SES and patient activation.  
4  
5 This is in contrast to other studies that have reported patient activation to vary by SES with  
6  
7 individuals from lower SES groups reported as less activated than those from higher SES  
8  
9 groups.<sup>6, 14</sup> These discordant findings could be attributable to our use of postcode as a  
10  
11 surrogate for SES, which may not accurately represent SES.  
12  
13

### 14 **Strengths and limitations**

15  
16  
17 Our findings should be interpreted in light of the strengths and limitations of our study design.  
18  
19 The strengths include the inclusion of several biologic and non-biological patient variables as  
20  
21 potential factors influencing patient activation since the factors are likely to be multifactorial.  
22  
23 The study was conducted across multiple sites increasing the generalizability of the findings  
24  
25<sup>52</sup> and we also used validated and disease-specific instruments for measuring HRQoL  
26  
27 (KDQoL<sup>TM</sup>-36) and patient activation (PAM 13<sup>TM</sup>). The limitations include that our findings  
28  
29 may not be generalised to culturally and linguistically diverse (CALD) populations. The cross  
30  
31 sectional design of the study also did not permit us to assess temporal effects or to rule out  
32  
33 the potential for reverse causality with low activation causing poor health. Longitudinal  
34  
35 studies would need to be conducted to better understand the effects over time of factors  
36  
37 influencing patient activation in this population.  
38  
39  
40  
41

### 42 **Conclusions**

43  
44  
45 In conclusion, in patients with co-morbid diabetes and CKD patient activation was low, with  
46  
47 almost half of patients reporting low activation. Older age and worse self-reported health  
48  
49 were associated with lower activation. This data may serve as the basis for the development  
50  
51 of interventions needed to enhance activation and outcomes for patients with diabetes and  
52  
53  
54  
55  
56  
57  
58  
59  
60  
CKD.

## Acknowledgements

We acknowledge S Chaviaras, D Giannopoulos, R McGrath and S Coggan for help in study conduct.

## Contributors

EZ, CL and SZ conceptualised the study. EZ, CL, SR and SZ performed data curation. EZ designed the analysis in consultation with CL, SR, GF, SJ, PK, KP, GR, RW, and SZ. EZ drafted the original draft and all authors reviewed and edited the final manuscript.

## Conflicts of Interest

The authors declare no conflicts of interest in relation to this work.

## Ethics approval

Approval for the Diabetes Renal Project (DRP) was obtained from Monash University, Monash Health, Alfred Health, Royal North Shore Hospital and Concord Hospital.

## Data sharing statement

Data for the DRP study can be shared for specific research questions that are available from the corresponding author on request.

## Funding

This work was supported by a National Health and Medical Research Council, Australia (NHMRC) Partnership Grant (ID 1055175) between the following health services, research institutes and national consumer stakeholder groups – Alfred Health; Concord Hospital; Royal North Shore Hospital; Monash Health; Monash Centre for Health Research and Implementation, Monash University; The George Institute for Global Health, University of Sydney; Diabetes Australia; and Kidney Health Australia. An Australian Postgraduate Award

Scholarship supported C Lo. H Teede was supported by a NHMRC, Practitioner Fellowship.

S Zoungas was supported by a NHMRC Senior Research Fellowship.

For peer review only



## References

1. Hibbard, J.H., J. Greene, E.R. Becker, et al., *Racial/ethnic disparities and consumer activation in health*. Health Aff (Millwood), 2008. **27**(5): p. 1442-53.
2. Alegria, M., W. Sribney, D. Perez, et al., *The role of patient activation on patient-provider communication and quality of care for US and foreign born Latino patients*. J Gen Intern Med, 2009. **24 Suppl 3**: p. 534-41.
3. Hibbard, J.H., J. Stockard, E.R. Mahoney, et al., *Development of the Patient Activation Measure (PAM): conceptualizing and measuring activation in patients and consumers*. Health Serv Res, 2004. **39**(4 Pt 1): p. 1005-26.
4. Donald, M., R.S. Ware, I.Z. Ozolins, et al., *The role of patient activation in frequent attendance at primary care: a population-based study of people with chronic disease*. Patient Educ Couns, 2011. **83**(2): p. 217-21.
5. Kim, J.Y., N.E. Wineinger, and S.R. Steinhubl, *The Influence of Wireless Self-Monitoring Program on the Relationship Between Patient Activation and Health Behaviors, Medication Adherence, and Blood Pressure Levels in Hypertensive Patients: A Substudy of a Randomized Controlled Trial*. J Med Internet Res, 2016. **18**(6): p. e116.
6. Greene, J. and J.H. Hibbard, *Why does patient activation matter? An examination of the relationships between patient activation and health-related outcomes*. J Gen Intern Med, 2012. **27**(5): p. 520-6.
7. Rask, K.J., D.C. Ziemer, S.A. Kohler, et al., *Patient activation is associated with healthy behaviors and ease in managing diabetes in an indigent population*. Diabetes Educ, 2009. **35**(4): p. 622-30.
8. Begum, N., M. Donald, I.Z. Ozolins, et al., *Hospital admissions, emergency department utilisation and patient activation for self-management among people with diabetes*. Diabetes Res Clin Pract, 2011. **93**(2): p. 260-7.
9. Remmers, C., J. Hibbard, D.M. Mosen, et al., *Is patient activation associated with future health outcomes and healthcare utilization among patients with diabetes?* J Ambul Care Manage, 2009. **32**(4): p. 320-7.
10. Thiboutot, J., H. Stuckey, A. Binette, et al., *A web-based patient activation intervention to improve hypertension care: study design and baseline characteristics in the web hypertension study*. Contemp Clin Trials, 2010. **31**(6): p. 634-46.
11. Olomu, A., N.N.S. Khan, D. Todem, et al., *Blood Pressure Control in Hypertensive Patients in Federally Qualified Health Centers: Impact of Shared Decision Making in the Office-GAP Program*. MDM Policy & Practice, 2016. **1**(1).
12. Johnson, M.L., L. Zimmerman, J.L. Welch, et al., *Patient activation with knowledge, self-management and confidence in chronic kidney disease*. J Ren Care, 2016. **42**(1): p. 15-22.
13. Winterbottom, A., H. Bekker, and A. Mooney, *Dialysis modality selection: physician guided or patient led?* Clin Kidney J, 2016. **9**(6): p. 823-825.
14. Hibbard, J.H. and P.J. Cunningham, *How engaged are consumers in their health and health care, and why does it matter?* Res Brief, 2008(8): p. 1-9.
15. Skolasky, R.L., A.F. Green, D. Scharfstein, et al., *Psychometric properties of the patient activation measure among multimorbid older adults*. Health Serv Res, 2011. **46**(2): p. 457-78.
16. Hendriks, M. and J. Rademakers, *Relationships between patient activation, disease-specific knowledge and health outcomes among people with diabetes; a survey study*. BMC Health Serv Res, 2014. **14**: p. 393.
17. Bos-Touwen, I., M. Schuurmans, E.M. Monninkhof, et al., *Patient and disease characteristics associated with activation for self-management in patients with diabetes, chronic obstructive*

- 1  
2  
3 *pulmonary disease, chronic heart failure and chronic renal disease: a cross-sectional survey*  
4 *study.* PLoS One, 2015. **10**(5): p. e0126400.
- 5 18. Association, C.D., *2008 clinical practice guidelines for the prevention and management of*  
6 *diabetes in Canada.* 2008.
- 7 19. Trisolini, M., A. Roussel, E. Zerhusen, et al., *Activating chronic kidney disease patients and*  
8 *family members through the Internet to promote integration of care.* Int J Integr Care, 2004.  
9 **4**: p. e17.
- 10 20. Al Shamsi, S., A. Al Dhanhani, M.M. Sheek-Hussein, et al., *Provision of care for chronic kidney*  
11 *disease by non-nephrologists in a developing nation: a national survey.* BMJ Open, 2016. **6**(8):  
12 p. e010832.
- 13 21. Bower, P., E. Harkness, W. Macdonald, et al., *Illness representations in patients with*  
14 *multimorbid long-term conditions: qualitative study.* Psychol Health, 2012. **27**(10): p. 1211-  
15 26.
- 16 22. Morris, R.L., C. Sanders, A.P. Kennedy, et al., *Shifting priorities in multimorbidity: a*  
17 *longitudinal qualitative study of patient's prioritization of multiple conditions.* Chronic Illn,  
18 2011. **7**(2): p. 147-61.
- 19 23. Fishbane, S., A.D. Hazzan, C. Halinski, et al., *Challenges and opportunities in late-stage*  
20 *chronic kidney disease.* Clinical Kidney Journal, 2015. **8**(1): p. 54-60.
- 21 24. Holman, H. and K. Lorig, *Patients as partners in managing chronic disease. Partnership is a*  
22 *prerequisite for effective and efficient health care.* Bmj, 2000. **320**(7234): p. 526-7.
- 23 25. World Health Organization, *Definition and diagnosis of diabetes mellitus and intermediate*  
24 *hyperglycemia: Report of a WHO/IDF Consultation.* 2006: Geneva. p. 69.
- 25 26. Agrawal, V., B.G. Jaar, X.Y. Frisby, et al., *Access to health care among adults evaluated for*  
26 *CKD: findings from the Kidney Early Evaluation Program (KEEP).* Am J Kidney Dis, 2012. **59**(3  
27 Suppl 2): p. S5-15.
- 28 27. Kidney Disease: Improving Global Outcomes (KDIGO) CKD Work Group, *KDIGO 2012 clinical*  
29 *practice guideline for the evaluation and management of chronic kidney disease.* Kidney  
30 International Supplements, 2012. **3**(1): p. 1.
- 31 28. Resnick, H.E., G.L. Foster, J. Bardsley, et al., *Achievement of American Diabetes Association*  
32 *clinical practice recommendations among U.S. adults with diabetes, 1999-2002: the National*  
33 *Health and Nutrition Examination Survey.* Diabetes Care, 2006. **29**(3): p. 531-7.
- 34 29. Hareri HA, A.M., *Assessments of Adherence to Hypertension Medications and Associated*  
35 *Factors among Patients Attending Tikur Anbessa Specialized Hospital Renal Unit, Addis*  
36 *Ababa, Ethiopia 2012.* International Journal of Nursing Science, 2013. **3**(1): p. 6.
- 37 30. Hibbard, J.H., E.R. Mahoney, J. Stockard, et al., *Development and testing of a short form of*  
38 *the patient activation measure.* Health Serv Res, 2005. **40**(6 Pt 1): p. 1918-30.
- 39 31. Aung, E., M. Donald, G.M. Williams, et al., *Joint influence of patient-assessed chronic illness*  
40 *care and patient activation on glycaemic control in type 2 diabetes.* International Journal for  
41 Quality in Health Care, 2015. **27**(2): p. 117-124.
- 42 32. Ahn, Y.H., B.J. Kim, O.K. Ham, et al., *Factors associated with Patient Activation for Self-*  
43 *management among Community Residents with Osteoarthritis in Korea.* J Korean Acad  
44 Community Health Nurs, 2015. **26**(3): p. 303-311.
- 45 33. Hendriks, S.H., L.C. Hartog, K.H. Groenier, et al., *Patient Activation in Type 2 Diabetes: Does It*  
46 *Differ between Men and Women?* J Diabetes Res, 2016. **2016**: p. 7386532.
- 47 34. Aung, E., M. Donald, J.R. Coll, et al., *Association between patient activation and patient-*  
48 *assessed quality of care in type 2 diabetes: results of a longitudinal study.* Health Expect,  
49 2016. **19**(2): p. 356-66.
- 50 35. Graffigna, G., S. Barello, A. Bonanomi, et al., *Measuring patient activation in Italy:*  
51 *Translation, adaptation and validation of the Italian version of the patient activation*  
52 *measure 13 (PAM13-I).* BMC Med Inform Decis Mak, 2015. **15**: p. 109.
- 53  
54  
55  
56  
57  
58  
59  
60

- 1
- 2
- 3 36. Blakemore, A., M. Hann, K. Howells, et al., *Patient activation in older people with long-term*
- 4 *conditions and multimorbidity: correlates and change in a cohort study in the United*
- 5 *Kingdom*. BMC Health Serv Res, 2016. **16**(1): p. 582.
- 6 37. Gleason, K.T., E.K. Tanner, C.M. Boyd, et al., *Factors associated with patient activation in an*
- 7 *older adult population with functional difficulties*. Patient Educ Couns, 2016. **99**(8): p. 1421-6.
- 8 38. Ryvicker, M., P.H. Feldman, Y.L. Chiu, et al., *The role of patient activation in improving blood*
- 9 *pressure outcomes in Black patients receiving home care*. Med Care Res Rev, 2013. **70**(6): p.
- 10 636-52.
- 11 39. Smith, S.G., A. Pandit, S.R. Rush, et al., *The Role of Patient Activation in Preferences for*
- 12 *Shared Decision Making: Results From a National Survey of U.S. Adults*. J Health Commun,
- 13 2016. **21**(1): p. 67-75.
- 14 40. Do, V., L. Young, S. Barnason, et al., *Relationships between activation level, knowledge, self-*
- 15 *efficacy, and self-management behavior in heart failure patients discharged from rural*
- 16 *hospitals*. F1000Res, 2015. **4**: p. 150.
- 17 41. Fowles, J.B., P. Terry, M. Xi, et al., *Measuring self-management of patients' and employees'*
- 18 *health: further validation of the Patient Activation Measure (PAM) based on its relation to*
- 19 *employee characteristics*. Patient Educ Couns, 2009. **77**(1): p. 116-22.
- 20 42. Lubetkin, E.I., W.H. Lu, and M.R. Gold, *Levels and correlates of patient activation in health*
- 21 *center settings: building strategies for improving health outcomes*. J Health Care Poor
- 22 *Underserved*, 2010. **21**(3): p. 796-808.
- 23 43. Abdel-Kader, K., L. Myaskovsky, I. Karpov, et al., *Individual quality of life in chronic kidney*
- 24 *disease: influence of age and dialysis modality*. Clin J Am Soc Nephrol, 2009. **4**(4): p. 711-8.
- 25 44. Magnezi, R., S. Glasser, H. Shalev, et al., *Patient activation, depression and quality of life*.
- 26 *Patient Education and Counseling*, 2014. **94**(3): p. 432-437.
- 27 45. Hadgkiss, E.J., G.A. Jelinek, K.L. Taylor, et al., *Engagement in a program promoting lifestyle*
- 28 *modification is associated with better patient-reported outcomes for people with MS*. Neurol
- 29 *Sci*, 2015. **36**(6): p. 845-52.
- 30 46. Mosen, D.M., J. Schmittdiel, J. Hibbard, et al., *Is patient activation associated with outcomes*
- 31 *of care for adults with chronic conditions?* J Ambul Care Manage, 2007. **30**(1): p. 21-9.
- 32 47. Chamie, K., S.E. Connor, S.L. Maliski, et al., *Prostate cancer survivorship: lessons from caring*
- 33 *for the uninsured*. Urol Oncol, 2012. **30**(1): p. 102-8.
- 34 48. Hedayati, S.S., A.T. Minhajuddin, R.D. Toto, et al., *Prevalence of major depressive episode in*
- 35 *CKD*. Am J Kidney Dis, 2009. **54**(3): p. 424-32.
- 36 49. Mujais, S.K., K. Story, J. Brouillette, et al., *Health-related quality of life in CKD Patients:*
- 37 *correlates and evolution over time*. Clin J Am Soc Nephrol, 2009. **4**(8): p. 1293-301.
- 38 50. Zimbudzi, E., C. Lo, S. Ranasinha, et al., *Predictors of Health-Related Quality of Life in Patients*
- 39 *with Co-Morbid Diabetes and Chronic Kidney Disease*. PLoS One, 2016. **11**(12): p. e0168491.
- 40 51. Pinquart, M. and S. Sorensen, *Correlates of physical health of informal caregivers: a meta-*
- 41 *analysis*. J Gerontol B Psychol Sci Soc Sci, 2007. **62**(2): p. P126-37.
- 42 52. Gold, J.L. and C.S. Dewa, *Institutional review boards and multisite studies in health services*
- 43 *research: is there a better way?* Health Serv Res, 2005. **40**(1): p. 291-307.
- 44
- 45
- 46
- 47
- 48
- 49
- 50
- 51
- 52
- 53
- 54
- 55
- 56
- 57
- 58
- 59
- 60

**Table 1:** Patient characteristics by activation status (N=305)

|                                               | Patient activation status |                  | <i>p</i> -value <sup>1</sup> |
|-----------------------------------------------|---------------------------|------------------|------------------------------|
|                                               | Low level N (%)           | High level N (%) |                              |
| Age                                           |                           |                  |                              |
| <68 years                                     | 68 (49.3)                 | 88 (53.3)        | 0.48                         |
| ≥68 years                                     | 70 (50.7)                 | 77 (46.7)        |                              |
| Gender                                        |                           |                  |                              |
| Women                                         | 42 (30.4)                 | 51 (30.9)        | 0.93                         |
| Men                                           | 96 (69.6)                 | 114 (69.1)       |                              |
| Socio-economic status, n: (%)                 |                           |                  | 0.86                         |
| Upper                                         | 24 (17.4)                 | 34 (20.6)        |                              |
| Upper middle                                  | 32 (23.2)                 | 31 (18.8)        |                              |
| Lower middle                                  | 27 (19.6)                 | 34 (20.6)        |                              |
| Upper lower                                   | 28 (20.3)                 | 31 (18.8)        |                              |
| Lower                                         | 27 (19.6)                 | 35 (21.2)        |                              |
| CKD <sup>2</sup> duration in years: mean (SD) | 8.8 (9.6)                 | 9.2 (11.6)       | 0.74                         |
| Stage of CKD                                  |                           |                  | 0.86                         |
| 3a                                            | 30 (21.7)                 | 42 (25.5)        |                              |
| 3b                                            | 35 (25.4)                 | 42 (25.5)        |                              |
| 4                                             | 34 (24.6)                 | 40 (24.2)        |                              |
| 5                                             | 39 (28.3)                 | 41 (24.8)        |                              |
| Diabetes duration in years: mean (SD)         | 17.1 (12.0)               | 18.2 (11.8)      | 0.40                         |
| Body mass index: mean, n: (%)                 |                           |                  |                              |
| Underweight                                   | 1 (1.4)                   | 1 (1.2)          | 0.60                         |
| Health weight                                 | 17 (24.3)                 | 15 (17.4)        |                              |
| Overweight                                    | 21 (30.0)                 | 23 (26.7)        |                              |
| Obese                                         | 47 (67.1)                 | 31 (36.0)        |                              |
| Dialysis status                               |                           |                  |                              |
| Current                                       | 29 (21.0)                 | 30 (18.2)        | 0.54                         |
| Predialysis                                   | 109 (79.0)                | 135 (81.8)       |                              |
| HRQOL <sup>3</sup> : mean (SD)                |                           |                  |                              |
| Symptom/problem list                          | 72.0 (17.6)               | 75.5 (17.4)      | 0.08                         |
| Effect of kidney disease                      | 71.0 (23.5)               | 74.1 (23.6)      | 0.27                         |
| Burden of kidney disease                      | 55.9 (29.5)               | 63.3 (31.9)      | 0.04                         |
| Physical composite summary                    | 34.4 (11.3)               | 36.0 (11.0)      | 0.26                         |
| Mental composite summary                      | 45.5 (10.5)               | 48.3 (11.0)      | 0.03                         |

Data are presented in N (%) unless otherwise indicated.

<sup>1</sup> T-test for mean differences and chi-square test for differences in proportions; <sup>2</sup> chronic kidney disease; <sup>3</sup> Health related quality of life

**Table 2:** Univariable and multivariable regression model for factors associated with activation in the study population

| Variables                             | Univariable<br>B (95% CI) | Multivariable<br>B (95% CI) |
|---------------------------------------|---------------------------|-----------------------------|
| Age                                   | -0.05 (-0.22 to 0.11)     | -0.18 (-0.35 to -0.01)*     |
| <i>Gender</i>                         |                           |                             |
| Men                                   | Ref                       | Ref                         |
| Women                                 | -0.79 (-4.59 to 3.02)     | -                           |
| <i>Health related quality of life</i> |                           |                             |
| Symptom problem list                  | 0.15 (0.05 to 0.25)**     | -                           |
| Effects of kidney disease             | 0.09 (0.02 to 0.17)*      | -                           |
| Burden of kidney disease              | 0.11 (0.05 to 0.16)***    | 0.11 (0.05 to 0.17)***      |
| Physical composite summary            | 0.17 (0.01 to 0.33)*      | -                           |
| Mental composite summary              | 0.26 (0.09 to 0.42)**     | -                           |
| Duration of diabetes                  | -0.02 (-0.17 to 0.13)     | -                           |
| Duration of kidney disease            | 0.07 (-0.11 to 0.25)      | -                           |
| eGFR <sup>a</sup>                     | 0.11 (0.00 to 0.21)*      | 0.01 (-0.12 to 0.15)        |
| <i>Body mass index</i>                |                           |                             |
| Health weight <sup>b</sup>            | Ref                       | Ref                         |
| Overweight                            | -2.78 (-7.75 to 2.20)     | -                           |
| Obese                                 | 1.98 (-2.03 to 5.99)      | -                           |
| <i>Socioeconomic status</i>           |                           |                             |
| Lower                                 | Ref                       | Ref                         |
| Lower middle                          | -0.31 (-4.75 to 4.12)     | -                           |
| Upper lower                           | -1.42 (-5.80 to 2.95)     | -                           |
| Upper middle                          | -0.95 (-5.27 to 3.38)     | -                           |
| Upper                                 | 3.17 (-1.28 7.62)         | -                           |
| Self-care composite score             | 0.21 (0.06 to 0.37)**     | 0.18 (0.02 to 0.35)*        |

\*p<0.05; \*\*p<0.01, \*\*\*p<0.001; a-per 1ml/min increase in eGFR; b-due to small numbers of underweight patients (N=2), the underweight group was combined with the health weight group for this analysis.

**S1:** Univariable and multivariable regression model for factors associated with activation in men with diabetes and chronic kidney disease

| Variables                             | Univariable<br>B (95% CI) | Multivariable<br>B (95% CI) |
|---------------------------------------|---------------------------|-----------------------------|
| Age                                   | -0.11 (-0.32 to 0.12)     | -                           |
| <i>Health related quality of life</i> |                           |                             |
| Symptom problem list                  | 0.12 (0.04 to 0.25)*      | -                           |
| Effects of kidney disease             | 0.04 (-0.05 to 0.13)      | -                           |
| Burden of kidney disease              | 0.08 (0.01 to 0.15)*      | -                           |
| Physical composite summary            | 0.06 (-0.15 to 0.26)      | -                           |
| Mental composite summary              | 0.23 (0.03 to 0.43)*      | 0.23 (0.02 to 0.44)*        |
| Duration of diabetes                  | 0.01 (-0.17 to 0.20)      | -                           |
| Duration of kidney disease            | 0.10 (-0.12 to 0.16)      | -                           |
| eGFR                                  | 0.03 (-0.12 to 0.16)      | -                           |
| <i>Body mass index</i>                |                           |                             |
| Health weight <sup>a</sup>            | Ref                       | Ref                         |
| Overweight                            | -5.08 (-10.96 to 0.80)    | -                           |
| Obese                                 | 2.87 (-2.08 to 7.81)      | -                           |
| <i>Socioeconomic status</i>           |                           |                             |
| Lower                                 | Ref                       | Ref                         |
| Lower middle                          | 0.41 (-5.04 to 5.85)      | -                           |
| Upper lower                           | -0.63 (-5.98 to 4.73)     | -                           |
| Upper middle                          | -2.23 (-7.37 to 2.92)     | -                           |
| Upper                                 | 4.65 (-1.04 to 10.33)*    | -                           |

\*p<0.05; \*\*p<0.01, \*\*\*p<0.001; a-due to small numbers of underweight patients (N=2), the underweight group was combined with the health weight group for this analysis

**S2:** Univariable and multivariable regression model for factors associated with activation in women with diabetes and chronic kidney disease

| Variables                             | Univariable<br>B (95% CI) | Multivariable<br>B (95% CI) |
|---------------------------------------|---------------------------|-----------------------------|
| Age                                   | 0.02 (-0.21 to 0.26)      | -                           |
| <i>Health related quality of life</i> |                           |                             |
| Symptom problem list                  | 0.21 (0.06 to 0.36)**     | 0.2 (0.05 to 0.35)**        |
| Effects of kidney disease             | 0.21 (0.09 to 0.33)**     | -                           |
| Burden of kidney disease              | 0.18 (0.09 to 0.27)***    | -                           |
| Physical composite summary            | 0.45 (0.19 to 0.71)**     | -                           |
| Mental composite summary              | 0.33 (0.05 to 0.60)*      | -                           |
| Duration of diabetes                  | -0.09 (-0.35 to 0.17)     | -                           |
| Duration of kidney disease            | 0.02 (-0.31 to 0.27)      | -                           |
| eGFR                                  | 0.27 (0.10 to 0.43)**     | 0.27 (0.11 to 0.44)**       |
| <i>Body mass index</i>                |                           |                             |
| Health weight                         | Ref                       | Ref                         |
| Overweight                            | 4.85 (-4.75 to 14.40)     | -                           |
| Obese                                 | -0.66 (-7.00 to 6.87)     | -                           |
| <i>Socioeconomic status</i>           |                           |                             |
| Lower                                 | Ref                       | Ref                         |
| Lower middle                          | -1.99 (-9.71 to 5.73)     | -                           |
| Upper lower                           | -3.33 (-11.03 to 4.38)    | -                           |
| Upper middle                          | -3.40 (-4.93 to 11.73)    | -                           |
| Upper                                 | 0.27 (-6.88 to 7.42)      | -                           |
| Self-care composite score             | 0.23 (-0.06 to 0.53)      | -                           |

\*p<0.05; \*\*p<0.01, \*\*\*p<0.001

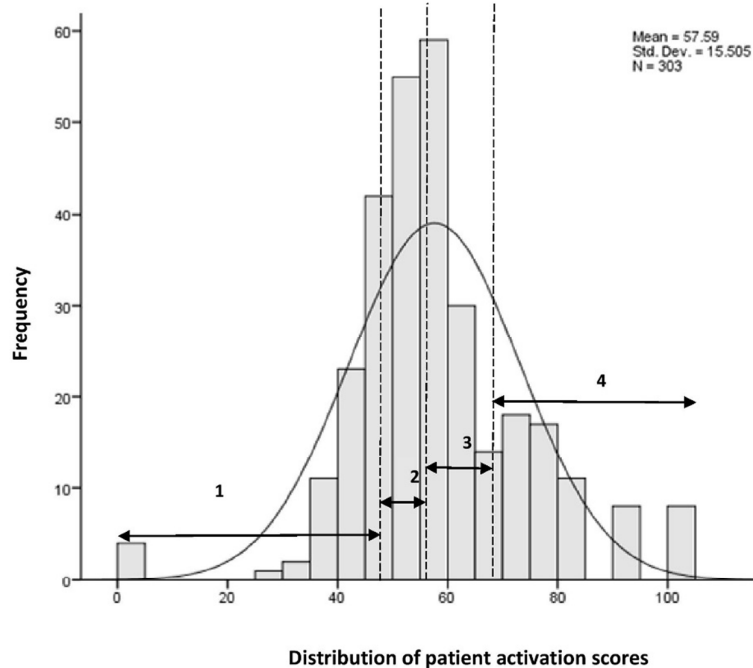

**Figure 1:** Distribution of participants across the four levels of patient activation. Level 1 (score of 0.0–47.0) indicates that a person may not yet understand that their role as a patient is important. Level 2 (47.1– 55.1) indicates that a person lacks the confidence and knowledge to take action. Level 3 (55.2– 67) indicates that a person is beginning to take action and level 4 (67.1–100) indicates that a person is proactive about health and engages in many recommended health behaviors



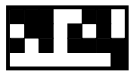

27311

Hospital ID: Site Staff ID: Participant ID: 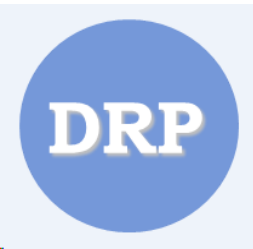

## DRP: Diabetes Renal Project (Doctors Survey - Health Indicators)

Thank-you for participating in this large multi-centre research project, called the Diabetes Renal Project (DRP). This National Health and Medical Research Council (NHMRC) partnership project is being conducted by Monash University, in partnership with Monash Health, Alfred Health, Royal North Shore Hospital, Concord Repatriation General Hospital, The George Institute for Global Health, Diabetes Australia, and Kidney Health Australia.

### INSTRUCTIONS

#### PLEASE:

Use a black **BIRO**, (DO NOT use a pencil or a fountain or felt tip pen)

Please **PRINT** in **CAPITAL** letters and stay within the box provided for text.

If you make a **mistake when writing**, cross it out with one thick line and write your correct answer above the box.

To answer a multiple choice question place a **CROSS INSIDE** the box like this:

If you make a **mistake**, place a diagonal line through the incorrect answer like this:  and then put a cross in the box of your preferred response.

Write dates using leading zeros (e.g. **6th April 2011 = 06/04/2011**)

**DO NOT USE** liquid paper to correct mistakes.

**AVOID** folding the form.

Please complete every page of the questionnaire. Sometimes questions may seem very similar or repetitious but they are all a little different, so please answer each question.

**THANK YOU**

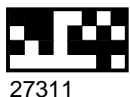

Hospital ID:  Site Staff ID:  Participant ID:

Date  /  /   
day month year

### Health Indicators (Doctors Survey)

#### Section 1: Demographic of Patient Participant

- |                                                                                                                                                                                                                                                                                                                                                                                                                                                                                                                                                                                                                                                            |                                                                                                                                                                                                                                                                                                                                                                                                                                                                                                                                                                                                                                                                                                                                               |
|------------------------------------------------------------------------------------------------------------------------------------------------------------------------------------------------------------------------------------------------------------------------------------------------------------------------------------------------------------------------------------------------------------------------------------------------------------------------------------------------------------------------------------------------------------------------------------------------------------------------------------------------------------|-----------------------------------------------------------------------------------------------------------------------------------------------------------------------------------------------------------------------------------------------------------------------------------------------------------------------------------------------------------------------------------------------------------------------------------------------------------------------------------------------------------------------------------------------------------------------------------------------------------------------------------------------------------------------------------------------------------------------------------------------|
| <p><b>1. Age (years)</b> <input type="text"/><input type="text"/></p> <p><b>2. Gender</b> <input type="checkbox"/> Male <input type="checkbox"/> Female</p> <p><b>3. Participant Post-code</b> <input type="text"/><input type="text"/><input type="text"/><input type="text"/><input type="text"/><input type="text"/></p> <p><b>4. Aboriginal background</b> <input type="checkbox"/> No <input type="checkbox"/> Yes</p> <p><b>5. Torres Strait Islander background</b> <input type="checkbox"/> No <input type="checkbox"/> Yes</p> <p><b>6. Maori/Pacific Strait Islander background</b> <input type="checkbox"/> No <input type="checkbox"/> Yes</p> | <p><b>7. Is the participant a current smoker ?</b><br/> <input type="checkbox"/> No → Skip to Q 8<br/> <input type="checkbox"/> Yes → <b>7.1. Average number of cigarettes smoked per day?</b> <input type="text"/><input type="text"/></p> <p><b>8. Has the participant previously smoked ?</b><br/> <input type="checkbox"/> No → Skip to Q 9<br/> <input type="checkbox"/> Yes → <b>8.1. Average number of cigarettes smoked per day?</b> <input type="text"/><input type="text"/></p> <p><b>9. Does the participant currently drink alcohol?</b><br/> <input type="checkbox"/> No → Skip to Q 10<br/> <input type="checkbox"/> Yes → <b>9.1. Average number of standard drinks per week?</b> <input type="text"/><input type="text"/></p> |
|------------------------------------------------------------------------------------------------------------------------------------------------------------------------------------------------------------------------------------------------------------------------------------------------------------------------------------------------------------------------------------------------------------------------------------------------------------------------------------------------------------------------------------------------------------------------------------------------------------------------------------------------------------|-----------------------------------------------------------------------------------------------------------------------------------------------------------------------------------------------------------------------------------------------------------------------------------------------------------------------------------------------------------------------------------------------------------------------------------------------------------------------------------------------------------------------------------------------------------------------------------------------------------------------------------------------------------------------------------------------------------------------------------------------|

#### Section 2: Examination Findings

Please complete with the most recent examination findings and date of examination

- 10. Blood Pressure - (the average of 3 readings measured after 5 minutes sitting)**  
 /  mmHg → **10.1**  /  /   
day month year
- 11. Heart Rate**  Bpm → **11.1**  /  /   
day month year
- 12. Weight** . Kg → **12.1**  /  /   
day month year
- 13. Height** . Metres → **13.1**  /  /   
day month year

At the most recent examination, does the participant have the following conditions:

- 14a. New loss of vibratory sensation (both feet)**  
 No  Yes → Date of examination **14a.1**  /  /   
 Not examined/unknown
- 14b. New loss of ankle reflexes (both legs)**  
 No  Yes → Date of examination **14b.1**  /  /   
 Not examined/unknown
- 14c. New loss of light touch (eg. loss of pressure sensation with 10gm force monofilament)**  
 No  Yes → Date of examination **14c.1**  /  /   
 Not examined/unknown



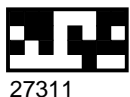

27311

Hospital ID:  Site Staff ID:  Participant ID:

**Section 3: Medical History (cont)**

**31. Prior to their current dialysis, has the patient been on any other form of dialysis?**

No → Skip to Q 32

Yes → **31.1 Haemodialysis?**

No  Yes

Date commenced **31.2**  /  /   
day month year

Date ceased **31.3**  /  /   
day month year

**31.4 Peritoneal dialysis?**

No  Yes

Date commenced **31.5**  /  /   
day month year

Date ceased **31.6**  /  /   
day month year

**32. Has the patient had a kidney transplant?**

No → Skip to Q 33

Yes → **32.1 Date of transplant**  /  /   
day month year

**OR**  Unknown/not documented

**Section 4: Medical Care of Diabetes and Chronic Kidney Disease**

**33. How often does the participant monitor his/her diabetes with a blood glucose monitor? (select one option)**

- ≥ 3 times per day  Once per day (daily)  Once per week (weekly)  Uncertain  
 2 times per day  A few times per week  Rarely  Not documented

**34. Please indicate when the participant was last referred/seen by the following health professionals. (Select the appropriate response for each health professional).**

|                             | Not referred/reviewed by this health professional | 3 months or less         | 4-12 months ago          | 13-24 months ago         | As required              | Uncertain                |
|-----------------------------|---------------------------------------------------|--------------------------|--------------------------|--------------------------|--------------------------|--------------------------|
| a. Endocrinologist          | <input type="checkbox"/>                          | <input type="checkbox"/> | <input type="checkbox"/> | <input type="checkbox"/> | <input type="checkbox"/> | <input type="checkbox"/> |
| b. Nephrologist             | <input type="checkbox"/>                          | <input type="checkbox"/> | <input type="checkbox"/> | <input type="checkbox"/> | <input type="checkbox"/> | <input type="checkbox"/> |
| c. Diabetes Nurse Educator  | <input type="checkbox"/>                          | <input type="checkbox"/> | <input type="checkbox"/> | <input type="checkbox"/> | <input type="checkbox"/> | <input type="checkbox"/> |
| d. Renal Nurse Practitioner | <input type="checkbox"/>                          | <input type="checkbox"/> | <input type="checkbox"/> | <input type="checkbox"/> | <input type="checkbox"/> | <input type="checkbox"/> |
| e. Optometrist              | <input type="checkbox"/>                          | <input type="checkbox"/> | <input type="checkbox"/> | <input type="checkbox"/> | <input type="checkbox"/> | <input type="checkbox"/> |
| f. Ophthalmologist          | <input type="checkbox"/>                          | <input type="checkbox"/> | <input type="checkbox"/> | <input type="checkbox"/> | <input type="checkbox"/> | <input type="checkbox"/> |
| g. Podiatrist               | <input type="checkbox"/>                          | <input type="checkbox"/> | <input type="checkbox"/> | <input type="checkbox"/> | <input type="checkbox"/> | <input type="checkbox"/> |
| h. Dentist                  | <input type="checkbox"/>                          | <input type="checkbox"/> | <input type="checkbox"/> | <input type="checkbox"/> | <input type="checkbox"/> | <input type="checkbox"/> |
| i. Dietician                | <input type="checkbox"/>                          | <input type="checkbox"/> | <input type="checkbox"/> | <input type="checkbox"/> | <input type="checkbox"/> | <input type="checkbox"/> |
| j. Social Worker            | <input type="checkbox"/>                          | <input type="checkbox"/> | <input type="checkbox"/> | <input type="checkbox"/> | <input type="checkbox"/> | <input type="checkbox"/> |

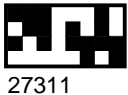

27311

Hospital ID: Site Staff ID: Participant ID: 

### Section 5: Medications

#### 35. Is the participant on Insulin?

No → Skip to Q 36

Yes → 35.1 Is the participant on an Insulin pump?  No  Yes

35.2 What type of insulin? (select all that apply)

Long acting  Short acting  Rapid acting  Basal

#### 36. Is the participant on diabetes tablets?

No → Skip to Q 34

Yes → Does the participant take:

36.1 Metformin?  No  Yes

36.2 Sulphonylurea?  No  Yes

36.3 Glitazone?  No  Yes

36.4 Acarbose?  No  Yes

36.5 Gliptin (DPP4 inhibitor)?  No  Yes

36.6 GLP1 agonist?  No  Yes  
(e.g exenatide or liraglutide)

36.7 SGLT2 inhibitors?  No  Yes

36.8 Other diabetes medication (please list below)

#### 37. Other medications - is the participant taking:

37.1 ACE inhibitor?  No  Yes

37.2 Angiotensin2 Receptor Blocker?  No  Yes

37.3 Other Antihypertensives?  No  Yes

37.4 Statin?  No  Yes

37.5 Fibrate?  No  Yes

37.6 Erythropoieting Stimulating Agent?  No  Yes

37.7 Phosphate binder?  No  Yes

37.8 Iron Supplementation (IV or Oral)?  No  Yes

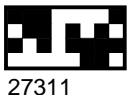

27311

Hospital ID:  Site Staff ID:  Participant ID:

**Section 6: Investigations**

38. Has a HbA1c test been performed in the last 3 months?  No  Yes

Please record the most recent HbA1c result

38.1 HbA1c  mmol/mol **and** 38.2 .% → 38.3 Date of test  /  /   
day month year

39. Please enter details below of the most recent lipid profile results:

40. Please enter details below of the most recent serum biochemistry profile results:

39.1 Total Cholesterol . mmol/L

40.1 Potassium . mmol/L

39.2 LDL Cholesterol . mmol/L

40.2 Creatinine  μmol/L

39.3 HDL Cholesterol . mmol/L

40.3 Calcium . mmol/L

39.4 Triglycerides . mmol/L

40.4 Phosphate . mmol/L

39.5 Date of test  /  /   
day month year

40.5 Parathyroid hormone (PTH) .  
(result within last 6 months)

**OR**  Not tested

40.5.1 Units  pmol/L  ng/L

**OR**  Not done within the past 6 months

40.6 eGFR  mL/min per 1.73m<sup>2</sup>

40.7 Albumin  g/L

40.8 Date of test  /  /   
day month year

(For PTH, please record result from within the past 6 months of this date)

**OR**  Not tested

41. Please record the most recent spot urine albumin / creatinine ratio (ACR):

. mg/mmol 40.1 Date of test  /  /   
day month year **OR**  Not tested

42. If you have used another method to measure microalbumin / proteinuria please record details below:

. 42.1 Units  mg/L  mg/24hr  μg/min  g/mmol  g/L

42.2 Date of test  /  /   
day month year **OR**  Not tested

43. Please enter the most recent Haemoglobin test result:

g/L 43.1 Date of test  /  /   
day month year

**OR**  Not tested

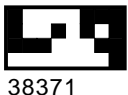

38371

Hospital ID:  Site Staff ID:  Participant ID:

Date  /  /   
day month year

**Patient Activation Measure (PAM) 13™** ©Insignia Health, LLC 2013

*Below are some statements that people sometimes make when they talk about their health. Please indicate how much you agree or disagree with each statement as it applies to you personally by crossing your answer. Your answers should be what is true for you and not just what you think others want you to say. If the statement does not apply to you, cross N/A. (Please choose only one response for each statement).*

|                                                                                                                            | Disagree Strongly        | Disagree                 | Agree                    | Agree Strongly           | N/A                      |
|----------------------------------------------------------------------------------------------------------------------------|--------------------------|--------------------------|--------------------------|--------------------------|--------------------------|
| 1. When all is said and done, I am the person who is responsible for taking care of my health                              | <input type="checkbox"/> |
| 2. Taking an active role in my own health care is the most important thing that affects my health                          | <input type="checkbox"/> |
| 3. I am confident that I can help prevent or reduce problems associated with my health                                     | <input type="checkbox"/> |
| 4. I know what each of my prescribed medications do                                                                        | <input type="checkbox"/> |
| 5. I am confident that I can tell whether I need to go to the doctor or whether I can take care of a health problem myself | <input type="checkbox"/> |
| 6. I am confident that I can tell a doctor concerns I have even when he or she does not ask                                | <input type="checkbox"/> |
| 7. I am confident that I can follow through on medical treatments I may need to do at home                                 | <input type="checkbox"/> |
| 8. I understand my health problems and what causes them                                                                    | <input type="checkbox"/> |
| 9. I know what treatments are available for my health problems                                                             | <input type="checkbox"/> |
| 10. I have been able to maintain (keep up with) lifestyle changes, like eating right or exercising                         | <input type="checkbox"/> |
| 11. I know how to prevent problems with my health                                                                          | <input type="checkbox"/> |
| 12. I am confident I can figure out solutions when new problems arise with my health                                       | <input type="checkbox"/> |
| 13. I am confident that I can maintain lifestyle changes, like eating right and exercising, even during times of stress    | <input type="checkbox"/> |

1  
2  
3  
4  
5  
6  
7  
8  
9  
10  
11  
12  
13  
14  
15  
16  
17  
18  
19  
20  
21  
22  
23  
24  
25  
26  
27  
28  
29  
30  
31  
32  
33  
34  
35  
36  
37  
38  
39  
40  
41  
42  
43  
44  
45  
46  
47  
48  
49  
50  
51  
52  
53  
54  
55  
56  
57  
58  
59  
60

---

# Your Health – *and* – Well-Being

## Kidney Disease and Quality of Life (KDQOL™-36)

This survey asks for your views about your health. This information will help keep track of how you feel and how well you are able to do your usual activities.

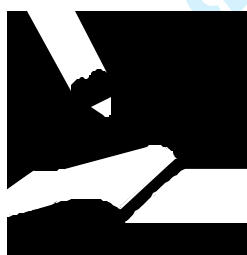

***Thank you for completing these questions!***



# Study of Quality of Life For Patients on Dialysis

---

---

## What is the purpose of the study?

This study is being carried out in cooperation with physicians and their patients. The purpose is to assess the quality of life of patients with kidney disease.

## What will I be asked to do?

For this study, we want you to complete a survey today about your health, how you feel and your background.

## Confidentiality of information?

We do not ask for your name. Your answers will be combined with those of other participants in reporting the findings of the study. Any information that would permit identification of you will be regarded as strictly confidential. In addition, all information collected will be used only for purposes of the study, and will not be disclosed or released for any other purpose without your prior consent.

## How will participation benefit me?

The information you provide will tell us how you feel about your care and further understanding about the effects of medical care on the health of patients. This information will help to evaluate the care delivered.

## Do I have to take part?

You do not have to fill out the survey and you can refuse to answer any question. Your decision to participate will not affect your opportunity to receive care.

# Your Health

This survey includes a wide variety of questions about your health and your life. We are interested in how you feel about each of these issues.

1. In general, would you say your health is: [Mark an  in the one box that best describes your answer.]

|                            |                            |                            |                            |                            |
|----------------------------|----------------------------|----------------------------|----------------------------|----------------------------|
| Excellent                  | Very good                  | Good                       | Fair                       | Poor                       |
| ▼                          | ▼                          | ▼                          | ▼                          | ▼                          |
| <input type="checkbox"/> 1 | <input type="checkbox"/> 2 | <input type="checkbox"/> 3 | <input type="checkbox"/> 4 | <input type="checkbox"/> 5 |

The following items are about activities you might do during a typical day. Does your health now limit you in these activities? If so, how much? [Mark an  in a box on each line.]

|                          |                             |                              |
|--------------------------|-----------------------------|------------------------------|
| Yes,<br>limited a<br>lot | Yes,<br>limited a<br>little | No, not<br>limited<br>at all |
|--------------------------|-----------------------------|------------------------------|

2. Moderate activities, such as moving a table, pushing a vacuum cleaner, bowling, or playing golf .....  1..... 2..... 3

3. Climbing several flights of stairs .....  1..... 2..... 3

**During the past 4 weeks, have you had any of the following problems with your work or other regular daily activities as a result of your physical health?**

|     |    |
|-----|----|
| Yes | No |
| ▼   | ▼  |

4. Accomplished less than you would like.....  1..... 2

5. Were limited in the kind of work or other activities .....  1..... 2

**During the past 4 weeks, have you had any of the following problems with your work or other regular daily activities as a result of any emotional problems (such as feeling depressed or anxious)?**

|     |    |
|-----|----|
| Yes | No |
| ▼   | ▼  |

6. Accomplished less than you would like.....  1..... 2

7. Didn't do work or other activities as carefully as usual .....  1..... 2

**8. During the past 4 weeks, how much did pain interfere with your normal work (including both work outside the home and housework)?**

|                            |                            |                            |                            |                            |
|----------------------------|----------------------------|----------------------------|----------------------------|----------------------------|
| Not at all                 | A little bit               | Moderately                 | Quite a bit                | Extremely                  |
| ▼                          | ▼                          | ▼                          | ▼                          | ▼                          |
| <input type="checkbox"/> 1 | <input type="checkbox"/> 2 | <input type="checkbox"/> 3 | <input type="checkbox"/> 4 | <input type="checkbox"/> 5 |

These questions are about how you feel and how things have been with you during the past 4 weeks. For each question, please give the one answer that comes closest to the way you have been feeling.

How much of the time during the past 4 weeks...

|        |        |        |        |          |        |
|--------|--------|--------|--------|----------|--------|
|        |        |        | A good |          |        |
| All    | Most   | bit    | Some   | A little | None   |
| of the   | of the |
| time   | time   | time   | time   | time     | time   |
| ▼      | ▼      | ▼      | ▼      | ▼        | ▼      |

9. Have you felt calm and peaceful?.....  1.....  2.....  3.....  4.....  5.....  6

10. Did you have a lot of energy? .....  1.....  2.....  3.....  4.....  5.....  6

11. Have you felt downhearted and blue? .  1.....  2.....  3.....  4.....  5.....  6

12. During the past 4 weeks, how much of the time has your physical health or emotional problems interfered with your social activities (like visiting with friends, relatives, etc.)?

|                            |                            |                            |                            |                            |
|----------------------------|----------------------------|----------------------------|----------------------------|----------------------------|
| All                        | Most                       | Some                       | A little                   | None                       |
| of the                     |
| time                       | time                       | time                       | time                       | time                       |
| ▼                          | ▼                          | ▼                          | ▼                          | ▼                          |
| <input type="checkbox"/> 1 | <input type="checkbox"/> 2 | <input type="checkbox"/> 3 | <input type="checkbox"/> 4 | <input type="checkbox"/> 5 |

# Your Kidney Disease

How true or false is each of the following statements for you?

|                 |             |            |              |                  |
|-----------------|-------------|------------|--------------|------------------|
| Definitely true | Mostly true | Don't know | Mostly false | Definitely false |
|-----------------|-------------|------------|--------------|------------------|

|   |   |   |   |   |
|---|---|---|---|---|
| ▼ | ▼ | ▼ | ▼ | ▼ |
|---|---|---|---|---|

13. My kidney disease interferes too much with my life .....  1 .....  2 .....  3 .....  4 .....  5

14. Too much of my time is spent dealing with my kidney disease .....  1 .....  2 .....  3 .....  4 .....  5

15. I feel frustrated dealing with my kidney disease .....  1 .....  2 .....  3 .....  4 .....  5

16. I feel like a burden on my family .....  1 .....  2 .....  3 .....  4 .....  5

**During the past 4 weeks, to what extent were you bothered by each of the following?**

|                        |                      |                        |                       |                       |
|------------------------|----------------------|------------------------|-----------------------|-----------------------|
| Not at all<br>bothered | Somewhat<br>bothered | Moderately<br>bothered | Very much<br>bothered | Extremely<br>bothered |
| ▼                      | ▼                    | ▼                      | ▼                     | ▼                     |

- |                   |                                                                              |                          |   |       |                          |   |       |                          |   |       |                          |   |       |                          |   |
|-------------------|------------------------------------------------------------------------------|--------------------------|---|-------|--------------------------|---|-------|--------------------------|---|-------|--------------------------|---|-------|--------------------------|---|
| 17.               | Soreness in your<br>muscles?.....                                            | <input type="checkbox"/> | 1 | ..... | <input type="checkbox"/> | 2 | ..... | <input type="checkbox"/> | 3 | ..... | <input type="checkbox"/> | 4 | ..... | <input type="checkbox"/> | 5 |
| 18.               | Chest pain? .....                                                            | <input type="checkbox"/> | 1 | ..... | <input type="checkbox"/> | 2 | ..... | <input type="checkbox"/> | 3 | ..... | <input type="checkbox"/> | 4 | ..... | <input type="checkbox"/> | 5 |
| 19.               | Cramps? .....                                                                | <input type="checkbox"/> | 1 | ..... | <input type="checkbox"/> | 2 | ..... | <input type="checkbox"/> | 3 | ..... | <input type="checkbox"/> | 4 | ..... | <input type="checkbox"/> | 5 |
| 20.               | Itchy skin?.....                                                             | <input type="checkbox"/> | 1 | ..... | <input type="checkbox"/> | 2 | ..... | <input type="checkbox"/> | 3 | ..... | <input type="checkbox"/> | 4 | ..... | <input type="checkbox"/> | 5 |
| 21.               | Dry skin?.....                                                               | <input type="checkbox"/> | 1 | ..... | <input type="checkbox"/> | 2 | ..... | <input type="checkbox"/> | 3 | ..... | <input type="checkbox"/> | 4 | ..... | <input type="checkbox"/> | 5 |
| 22.               | Shortness of<br>breath?.....                                                 | <input type="checkbox"/> | 1 | ..... | <input type="checkbox"/> | 2 | ..... | <input type="checkbox"/> | 3 | ..... | <input type="checkbox"/> | 4 | ..... | <input type="checkbox"/> | 5 |
| 23.               | Faintness or<br>dizziness?.....                                              | <input type="checkbox"/> | 1 | ..... | <input type="checkbox"/> | 2 | ..... | <input type="checkbox"/> | 3 | ..... | <input type="checkbox"/> | 4 | ..... | <input type="checkbox"/> | 5 |
| 24.               | Lack of appetite?...                                                         | <input type="checkbox"/> | 1 | ..... | <input type="checkbox"/> | 2 | ..... | <input type="checkbox"/> | 3 | ..... | <input type="checkbox"/> | 4 | ..... | <input type="checkbox"/> | 5 |
| 25.               | Washed out or<br>drained?.....                                               | <input type="checkbox"/> | 1 | ..... | <input type="checkbox"/> | 2 | ..... | <input type="checkbox"/> | 3 | ..... | <input type="checkbox"/> | 4 | ..... | <input type="checkbox"/> | 5 |
| 26.               | Numbness in<br>hands or feet?.....                                           | <input type="checkbox"/> | 1 | ..... | <input type="checkbox"/> | 2 | ..... | <input type="checkbox"/> | 3 | ..... | <input type="checkbox"/> | 4 | ..... | <input type="checkbox"/> | 5 |
| 27.               | Nausea or upset<br>stomach?.....                                             | <input type="checkbox"/> | 1 | ..... | <input type="checkbox"/> | 2 | ..... | <input type="checkbox"/> | 3 | ..... | <input type="checkbox"/> | 4 | ..... | <input type="checkbox"/> | 5 |
| 28 <sup>a</sup> . | (Hemodialysis patient only)<br>Problems with<br>your access site? ...        | <input type="checkbox"/> | 1 | ..... | <input type="checkbox"/> | 2 | ..... | <input type="checkbox"/> | 3 | ..... | <input type="checkbox"/> | 4 | ..... | <input type="checkbox"/> | 5 |
| 28 <sup>b</sup> . | (Peritoneal dialysis patient only)<br>Problems with<br>your catheter site?.. | <input type="checkbox"/> | 1 | ..... | <input type="checkbox"/> | 2 | ..... | <input type="checkbox"/> | 3 | ..... | <input type="checkbox"/> | 4 | ..... | <input type="checkbox"/> | 5 |

# Effects of Kidney Disease on Your Daily Life

Some people are bothered by the effects of kidney disease on their daily life, while others are not. How much does kidney disease bother you in each of the following areas?

|                        |                      |                        |                       |                       |
|------------------------|----------------------|------------------------|-----------------------|-----------------------|
| Not at all<br>bothered | Somewhat<br>bothered | Moderately<br>bothered | Very much<br>bothered | Extremely<br>bothered |
|------------------------|----------------------|------------------------|-----------------------|-----------------------|

|   |   |   |   |   |
|---|---|---|---|---|
| ▼ | ▼ | ▼ | ▼ | ▼ |
|---|---|---|---|---|

- 29. Fluid restriction?....  1 .....  2 .....  3 .....  4 .....  5
- 30. Dietary restriction?.  1 .....  2 .....  3 .....  4 .....  5
- 31. Your ability to work around the house? .....  1 .....  2 .....  3 .....  4 .....  5
- 32. Your ability to travel? .....  1 .....  2 .....  3 .....  4 .....  5
- 33. Being dependent on doctors and other medical staff?.....  1 .....  2 .....  3 .....  4 .....  5
- 34. Stress or worries caused by kidney disease? .....  1 .....  2 .....  3 .....  4 .....  5
- 35. Your sex life? .....  1 .....  2 .....  3 .....  4 .....  5
- 36. Your personal appearance? .....  1 .....  2 .....  3 .....  4 .....  5

*Thank you for completing these questions!*

STROBE Statement—Checklist of items that should be included in reports of *cross-sectional studies*

|                              | Item No | Recommendation                                                                                                                                                                                                                                                                                                                                                                                             |
|------------------------------|---------|------------------------------------------------------------------------------------------------------------------------------------------------------------------------------------------------------------------------------------------------------------------------------------------------------------------------------------------------------------------------------------------------------------|
| <b>Title and abstract</b>    | 1       | (a) Indicate the study's design with a commonly used term in the title or the abstract (Page 2 and page 5)<br>(b) Provide in the abstract an informative and balanced summary of what was done and what was found (Page 2-abstract)                                                                                                                                                                        |
| <b>Introduction</b>          |         |                                                                                                                                                                                                                                                                                                                                                                                                            |
| Background/rationale         | 2       | Explain the scientific background and rationale for the investigation being reported (Page 4 to 5 of the background)                                                                                                                                                                                                                                                                                       |
| Objectives                   | 3       | State specific objectives, including any prespecified hypotheses (Stated on page 5, second paragraph)                                                                                                                                                                                                                                                                                                      |
| <b>Methods</b>               |         |                                                                                                                                                                                                                                                                                                                                                                                                            |
| Study design                 | 4       | Present key elements of study design early in the paper (Page 5, under methods)                                                                                                                                                                                                                                                                                                                            |
| Setting                      | 5       | Describe the setting, locations, and relevant dates, including periods of recruitment, exposure, follow-up, and data collection (Page 5, under methods)                                                                                                                                                                                                                                                    |
| Participants                 | 6       | (a) Give the eligibility criteria, and the sources and methods of selection of participants (Page 5, lines 18-24)                                                                                                                                                                                                                                                                                          |
| Variables                    | 7       | Clearly define all outcomes, exposures, predictors, potential confounders, and effect modifiers. Give diagnostic criteria, if applicable (Page 6 to 7)                                                                                                                                                                                                                                                     |
| Data sources/<br>measurement | 8*      | For each variable of interest, give sources of data and details of methods of assessment (measurement). Describe comparability of assessment methods if there is more than one group (Page 6 and 7; health related quality of life and patient activation)                                                                                                                                                 |
| Bias                         | 9       | Describe any efforts to address potential sources of bias (Page 6 and 7, validated measures were used)                                                                                                                                                                                                                                                                                                     |
| Study size                   | 10      | Explain how the study size was arrived at                                                                                                                                                                                                                                                                                                                                                                  |
| Quantitative variables       | 11      | Explain how quantitative variables were handled in the analyses. If applicable, describe which groupings were chosen and why (Page 7 under data analysis)                                                                                                                                                                                                                                                  |
| Statistical methods          | 12      | (a) Describe all statistical methods, including those used to control for confounding (Page 7 to 8)<br>(b) Describe any methods used to examine subgroups and interactions (Page 8, lines 1 to 4)<br>(c) Explain how missing data were addressed (Page 8, line 13-15)<br>(d) If applicable, describe analytical methods taking account of sampling strategy (N/A)<br>(e) Describe any sensitivity analyses |
| <b>Results</b>               |         |                                                                                                                                                                                                                                                                                                                                                                                                            |
| Participants                 | 13*     | (a) Report numbers of individuals at each stage of study—eg numbers potentially eligible, examined for eligibility, confirmed eligible, included in the study, completing follow-up, and analysed (Page 8, line 13)<br>(b) Give reasons for non-participation at each stage<br>(c) Consider use of a flow diagram                                                                                          |
| Descriptive data             | 14*     | (a) Give characteristics of study participants (eg demographic, clinical, social) and information on exposures and potential confounders (Page 8, line 15 to 22)<br>(b) Indicate number of participants with missing data for each variable of interest (Page 8, line 15 to 16)                                                                                                                            |



|                          |     |                                                                                                                                                                                                                       |
|--------------------------|-----|-----------------------------------------------------------------------------------------------------------------------------------------------------------------------------------------------------------------------|
| Outcome data             | 15* | Report numbers of outcome events or summary measures                                                                                                                                                                  |
| Main results             | 16  | (a) Give unadjusted estimates and, if applicable, confounder-adjusted estimates and their precision (eg, 95% confidence interval). Make clear which confounders were adjusted for and why they were included (Page 9) |
|                          |     | (b) Report category boundaries when continuous variables were categorized                                                                                                                                             |
|                          |     | (c) If relevant, consider translating estimates of relative risk into absolute risk for a meaningful time period N/A                                                                                                  |
| Other analyses           | 17  | Report other analyses done—eg analyses of subgroups and interactions, and sensitivity analyses (Page 9, lines 14 to 22- subgroup analyses by gender)                                                                  |
| <b>Discussion</b>        |     |                                                                                                                                                                                                                       |
| Key results              | 18  | Summarise key results with reference to study objectives (Page 10, lines 1 to 10)                                                                                                                                     |
| Limitations              | 19  | Discuss limitations of the study, taking into account sources of potential bias or imprecision. Discuss both direction and magnitude of any potential bias (Page 12, lines page 12 to 16)                             |
| Interpretation           | 20  | Give a cautious overall interpretation of results considering objectives, limitations, multiplicity of analyses, results from similar studies, and other relevant evidence (page 10 to 11)                            |
| Generalisability         | 21  | Discuss the generalisability (external validity) of the study results (Page 12, lines 9 to 12)                                                                                                                        |
| <b>Other information</b> |     |                                                                                                                                                                                                                       |
| Funding                  | 22  | Give the source of funding and the role of the funders for the present study and, if applicable, for the original study on which the present article is based (Page 19, under funding)                                |

\*Give information separately for exposed and unexposed groups.

**Note:** An Explanation and Elaboration article discusses each checklist item and gives methodological background and published examples of transparent reporting. The STROBE checklist is best used in conjunction with this article (freely available on the Web sites of PLoS Medicine at <http://www.plosmedicine.org/>, Annals of Internal Medicine at <http://www.annals.org/>, and Epidemiology at <http://www.epidem.com/>). Information on the STROBE Initiative is available at [www.strobe-statement.org](http://www.strobe-statement.org).

# BMJ Open

## Factors associated with patient activation in an Australian population with comorbid diabetes and chronic kidney disease: a cross sectional study

|                                 |                                                                                                                                                                                                                                                                                                                                                                                                                                                                                                                                                                                                                                                                                                                                                                                                                                                                                                                                                                                                                                                                                                                                                                                                                                                           |
|---------------------------------|-----------------------------------------------------------------------------------------------------------------------------------------------------------------------------------------------------------------------------------------------------------------------------------------------------------------------------------------------------------------------------------------------------------------------------------------------------------------------------------------------------------------------------------------------------------------------------------------------------------------------------------------------------------------------------------------------------------------------------------------------------------------------------------------------------------------------------------------------------------------------------------------------------------------------------------------------------------------------------------------------------------------------------------------------------------------------------------------------------------------------------------------------------------------------------------------------------------------------------------------------------------|
| Journal:                        | <i>BMJ Open</i>                                                                                                                                                                                                                                                                                                                                                                                                                                                                                                                                                                                                                                                                                                                                                                                                                                                                                                                                                                                                                                                                                                                                                                                                                                           |
| Manuscript ID                   | bmjopen-2017-017695.R1                                                                                                                                                                                                                                                                                                                                                                                                                                                                                                                                                                                                                                                                                                                                                                                                                                                                                                                                                                                                                                                                                                                                                                                                                                    |
| Article Type:                   | Research                                                                                                                                                                                                                                                                                                                                                                                                                                                                                                                                                                                                                                                                                                                                                                                                                                                                                                                                                                                                                                                                                                                                                                                                                                                  |
| Date Submitted by the Author:   | 26-Jul-2017                                                                                                                                                                                                                                                                                                                                                                                                                                                                                                                                                                                                                                                                                                                                                                                                                                                                                                                                                                                                                                                                                                                                                                                                                                               |
| Complete List of Authors:       | Zimbudzi, Edward; Monash University, Monash Centre for Health Research and Implementation-MCHRI, School of Public Health and Preventive Medicine; Monash Health, Department of Nephrology<br>Lo, Clement; Monash University, Monash Centre for Health Research and Implementation-MCHRI, School of Public Health and Preventive Medicine; Monash Health, Diabetes and Vascular Medicine Unit<br>Ranasinha, Sanjeeva; Monash University, Monash Centre for Health Research and Implementation-MCHRI, School of Public Health and Preventive Medicine<br>Fulcher, Gregory; Royal North Shore Hospital, Endocrinology; University of Sydney, Northern Clinical School<br>Jan, Stephen; University of Sydney, The George Institute for Global Health; University of Sydney, Sydney Medical School Westmead<br>Kerr, Peter; Monash Health, Department of Nephrology<br>Polkinghorne, Kevin; Monash Health, Nephrology<br>Russell, Grant; Monash University, School of Primary Health Care<br>Walker, Rowan; Alfred Hospital, Renal Medicine<br>Zoungas, Sophia; Monash University, . Monash Centre for Health Research and Implementation-MCHRI, School of Public Health and Preventive Medicine; University of Sydney, The George Institute for Global Health |
| <b>Primary Subject Heading</b>: | Public health                                                                                                                                                                                                                                                                                                                                                                                                                                                                                                                                                                                                                                                                                                                                                                                                                                                                                                                                                                                                                                                                                                                                                                                                                                             |
| Secondary Subject Heading:      | Patient-centred medicine, Renal medicine, Diabetes and endocrinology                                                                                                                                                                                                                                                                                                                                                                                                                                                                                                                                                                                                                                                                                                                                                                                                                                                                                                                                                                                                                                                                                                                                                                                      |
| Keywords:                       | Patient activation, diabetes, chronic kidney disease, self-care, health related quality of life                                                                                                                                                                                                                                                                                                                                                                                                                                                                                                                                                                                                                                                                                                                                                                                                                                                                                                                                                                                                                                                                                                                                                           |
|                                 |                                                                                                                                                                                                                                                                                                                                                                                                                                                                                                                                                                                                                                                                                                                                                                                                                                                                                                                                                                                                                                                                                                                                                                                                                                                           |

SCHOLARONE™  
Manuscripts

1  
2  
3 **Factors associated with patient activation in an Australian population with comorbid**  
4 **diabetes and chronic kidney disease: a cross sectional study**  
5  
6  
7

8  
9 Edward Zimbudzi<sup>1,2</sup>, Clement Lo<sup>1,3</sup>, Sanjeeva Ranasinha<sup>1</sup>, Gregory Fulcher<sup>4</sup>, Stephen  
10 Jan<sup>5,6</sup>, Peter G Kerr<sup>2</sup>, Kevin R. Polkinghorne<sup>2</sup>, Grant Russell<sup>7</sup>, Rowan G. Walker<sup>8</sup>, and  
11 Sophia Zoungas<sup>1,3,5</sup>  
12  
13

14  
15  
16  
17 1. Monash Centre for Health Research and Implementation-MCHRI, School of Public Health and  
18 Preventive Medicine, Monash University, Melbourne, VIC, Australia

19  
20 2. Department of Nephrology, Monash Health, Melbourne, VIC, Australia

21  
22 3. Diabetes and Vascular Medicine Unit, Monash Health, Melbourne, VIC, Australia

23  
24 4. Department of Diabetes and Endocrinology, Royal North Shore Hospital, St Leonards, New South  
25 Wales, Australia  
26

27  
28 5. The George Institute for Global Health, University of Sydney, Sydney, NSW, Australia

29  
30 6. Sydney Medical School Westmead, University of Sydney, Sydney, NSW, Australia

31  
32 7. School of Primary Health and Allied Health Care, Monash University, Melbourne, VIC, Australia

33  
34 8. Department of Renal Medicine, Alfred Hospital, Melbourne, VIC, Australia  
35  
36  
37  
38  
39  
40  
41

42 **Corresponding Author**

43 Prof Sophia Zoungas

44 Monash Centre for Health Research and Implementation

45 School of Public Health and Preventive Medicine, Monash University

46 43-51 Kanooka Grove, Clayton, VIC 3168, Australia

47 Tel.: +61 3 9594 7500; fax: +61 3 9594 7554

48 E-mail address: sophia.zoungas@monash.edu  
49  
50  
51  
52  
53  
54

55 Abstract word count:268

56 Main text word count: 3115  
57  
58  
59  
60

## Abstract

**Objective** To evaluate the extent of patient activation and factors associated with activation in adults with co-morbid diabetes and chronic kidney disease (CKD).

**Design** A cross sectional study.

**Setting** Renal/diabetes clinics of four tertiary hospitals across the 2 largest states of Australia.

**Study population** Adult patients (over 18 years) with co-morbid diabetes and CKD (eGFR <60 mL/min/1.73m<sup>2</sup>).

**Main outcome measures** Patients completed the Patient Activation Measure, the Kidney Disease Quality of Life and demographic and clinical data survey from January to December 2014. Factors associated with patient activation were examined using chi-squared or t-tests and linear regression.

**Results** Three hundred and five patients with median age of 68 (IQR 14.8) years were studied. They were evenly distributed across socioeconomic groups, stage of kidney disease and duration of diabetes but not gender. Approximately 46% reported low activation. In patients with low activation, the symptom/problem list, burden of kidney disease and mental composite subscales scores were all significantly lower (all  $p < 0.05$ ). On multivariable analysis, factors associated with lower activation for all patients were older age, worse self-reported health in the burden of kidney disease subscale and lower self-care scores. Additionally, in men, worse self-reported health in the mental composite subscale was associated with lower activation and in women, worse self-reported health scores in the symptom problem list and greater renal impairment were associated with lower activation.

**Conclusion** Findings from this study suggest that levels of activation are low in patients with diabetes and CKD. Older age and worse self-reported health were associated with lower activation. This data may serve as the basis for the development of interventions needed to enhance activation and outcomes for patients with diabetes and CKD.

## Key words

Patient activation; diabetes; chronic kidney disease; self-care; health related quality of life

**Strengths and limitations of this study**

- Several biologic and non-biological patient variables were included as potential factors influencing patient activation since the factors are likely to be multifactorial.
- The study was conducted across multiple sites increasing the generalizability of the findings.
- The limitations include that our findings may not be generalised to culturally and linguistically diverse (CALD) populations.
- Cross sectional study design of the study did not permit us to assess temporal effects or to rule out the potential for reverse causality with low activation causing poor health.

## INTRODUCTION

Patient activation may be defined as the ability and willingness of patients to take on the role of managing their own health and health care<sup>1</sup> and is related to the degree that a patient participates or engages in specific health behaviours.<sup>2-4</sup> Previous studies of hypertensive patients in primary care settings suggest that patient activation is associated with patient outcomes, where low activated patients are more likely to smoke,<sup>5</sup> have a higher body mass index (BMI) and less likely to achieve cholesterol and glycated haemoglobin (HbA1c) targets.<sup>6</sup> In patients with diabetes, high activation has been associated with greater engagement in exercise,<sup>7</sup> fewer hospitalisations<sup>8</sup> and improved glycemic control.<sup>9</sup> In patients with hypertension<sup>5,10,11</sup> and chronic kidney disease (CKD)<sup>12</sup> high activation is associated with better blood pressure control and in patients with end-stage kidney disease higher activation is likely to improve uptake of home dialysis.<sup>13</sup>

Low activation levels have been reported in 25-40% of the general population<sup>14</sup> and in patients living with chronic diseases.<sup>12,15,16</sup> However, activation levels may vary considerably depending on the severity of the chronic disease.<sup>17,18</sup> Indeed, little is known about the activation levels of patients with multiple and complex chronic diseases, including co-morbid diabetes and CKD. Among patients with diabetes and CKD, a sufficient degree of activation is required for patients to perform self-management behaviors such as blood glucose monitoring and medication self-management.<sup>19</sup> Moreover, as these patients face competing treatment demands especially when treatment recommendations for one condition conflict with or impede management of the other, or when patients prioritize one condition over another,<sup>20-22</sup> understanding the degree of patient activation becomes even more important.

1  
2  
3 Missed opportunities to enhance activation among patients with diabetes and CKD may result  
4  
5 in more rapid progression of CKD and development of associated complications.<sup>23</sup>  
6

7 Additionally, activation levels may fluctuate as the disease progresses and complications  
8  
9 arise necessitating matched changes in activation behaviour.<sup>24</sup>  
10

11  
12 Given the importance of patient activation for self-management in people with diabetes and  
13  
14 CKD and ultimately patient outcomes, it is important to establish the level of activation in  
15  
16 these patients and determine the patient and disease characteristics that influence activation.  
17  
18 Consequently, the purpose of the present study was to 1) examine to what degree patients  
19  
20 with co-morbid diabetes and CKD are activated and 2) identify what modifiable risk factors  
21  
22 are independently associated with activation levels in patients with co-morbid diabetes and  
23  
24 CKD.  
25  
26

## 27 28 29 **METHODS**

### 30 31 32 **Study design and participants**

33  
34  
35 A cross-sectional study was conducted (as previously described)<sup>25</sup> of patients attending  
36  
37 diabetes and renal outpatient clinics of four public tertiary hospitals in Victoria and New  
38  
39 South Wales (Monash Health, Alfred Health, Royal North Shore Hospital and Concord  
40  
41 Hospital) from January to December 2014. Participants were eligible if they received their  
42  
43 usual care at these hospitals and had a diagnosis of diabetes (either type 1 or type 2) and  
44  
45 chronic kidney disease stages 3 to 5 (eGFR<60 mL/min). The diagnosis of diabetes followed  
46  
47 the World Health Organisation definition<sup>26</sup> and was recorded from patients' prior inpatient  
48  
49 or outpatient contacts. Patients were recruited prospectively from clinics and asked to  
50  
51 complete a number of questionnaires which included the Diabetes Renal Project (Patient  
52  
53 Survey), Diabetes Renal Project (Doctors Survey), the Patient Activation Measure (PAM-13),  
54  
55 the Kidney Disease Quality of Life short form (KDQoL<sup>TM</sup>-36) and the Summary of Diabetes  
56  
57  
58  
59  
60

1  
2  
3 Self-Care Activities (SDSCA) questionnaire (Supplementary Appendices 1, 2, 3, 4 and 5).  
4  
5 The Diabetes Renal Project (Patient Survey) collected demographic information (age, gender,  
6  
7 country of birth, language spoken at home) and clinical characteristics such as duration of  
8  
9 diabetes and CKD. For each patient the site study staff or the clinician, using standardised  
10  
11 procedures that included health assessment templates also completed a corresponding clinical  
12  
13 survey, the Diabetes Renal Project (Doctors Survey) (Supplementary Appendix 2). The  
14  
15 questionnaire collected information on patients' medical history, clinical findings, access to  
16  
17 medical care for diabetes and CKD, medications and investigations such as blood test results.  
18  
19 All participants were provided with written informed consent and 317 agreed to participate.  
20  
21 This study was approved by all local hospital and university Human Research Ethics  
22  
23 Committees (Monash Health Human Research Ethics Committee, Alfred Health Research  
24  
25 Ethics Committee, Monash University Human Research Ethics Committee, Northern Sydney  
26  
27 Local Health District Human Research Ethics Committee, Sydney Local Health District  
28  
29 Human Research Ethics Committee and the University of Sydney Human Research Ethics  
30  
31 Committee).

### 32 33 34 35 36 37 **Demographic and clinical variables**

38  
39 Age, gender, socio-economic status (SES), stage of kidney disease, duration of kidney  
40  
41 disease and duration of diabetes were all recorded as possible determinants of patient  
42  
43 activation. Socio-economic status was estimated using the Australian Bureau of Statistics  
44  
45 data.<sup>27</sup> Postcodes were coded according to the Index of Relative Social Disadvantage (IRSD),  
46  
47 a composite measure based on selected census variables, which include income, educational  
48  
49 attainment and employment status. The IRSD scores for each postcode were then grouped  
50  
51 into quintiles for analysis, where the highest quintile comprised 20% of postcodes with the  
52  
53 highest IRSD scores (the most advantaged areas).  
54  
55  
56  
57  
58  
59  
60



1  
2  
3 CKD stage as defined by the Kidney Disease: Improving Global Outcomes (KDIGO) was  
4  
5 used to define severity of the disease.<sup>28</sup> Duration of CKD was analysed as a continuous  
6  
7 variable. Estimated GFR was calculated using the CKD EPI formula  $GFR = 141 \times \min$   
8  
9  $(Scr/\kappa, 1)^\alpha \times \max(Scr/\kappa, 1)^{-1.209} \times 0.993^{Age} \times 1.018 \times 1.159$  where Scr is serum creatinine  
10  
11 (mg/dL),  $\kappa$  is 0.7 for females and 0.9 for males,  $\alpha$  is  $-0.329$  for females and  $-0.411$  for males,  
12  
13 min indicates the minimum of Scr/ $\kappa$  or 1, and max indicates the maximum of Scr/ $\kappa$  or 1.<sup>29</sup>  
14  
15 We used the CKD Epi formula because it is routinely reported in Australia<sup>30</sup> as the equation  
16  
17 of choice and is recommended by the Kidney Disease, Improving Global Outcomes (KDIGO)  
18  
19 guidelines<sup>31</sup>.

### 22 23 24 **Self-care**

25  
26 Self-care was assessed by the SDSCA questionnaire<sup>32</sup>, which is a self-report measure of how  
27  
28 often participants performed diabetes self-care activities. The SDSCA questionnaire has been  
29  
30 utilised in several studies and settings and is considered to be reliable, valid, and sensitive<sup>33-35</sup>  
31  
32 in evaluating self-care among adults with diabetes. This study used a version of the SDSCA  
33  
34 questionnaire that included items assessing five domains of diabetes self-management which  
35  
36 are; general diet (2 items), specific diet (2 items), exercise (2 items), blood glucose testing (2  
37  
38 items), and foot care (2 items)<sup>32</sup>. The medication self-management domain was excluded  
39  
40 because of its ceiling effects and lack of variability among participants<sup>32</sup>. The smoking self-  
41  
42 management domain was also excluded because smoking behaviour was relevant to smokers  
43  
44 only.  
45  
46  
47

### 48 49 50 **Health Related quality of life**

51  
52 Health related quality of life was assessed using the English version of the Kidney Disease  
53  
54 and Quality of Life (KDQoL<sup>TM</sup>-36) questionnaire, which is a 36-item HRQoL survey with  
55  
56 five subscales, namely the SF-12 measure of physical and mental functioning, burden of  
57  
58  
59  
60

1  
2  
3 kidney disease, symptom/problems list and the effects of kidney disease subscales.<sup>36</sup> Item  
4  
5 scores were summed for each scale and transformed on a scale of 0 to 100 with a higher score  
6  
7 indicating better HRQoL.<sup>29</sup> The validity and reliability of the Kidney Disease and Quality of  
8  
9 Life (KDQoLTM-36) questionnaire has been reported previously.<sup>37, 38, 39</sup>

### 11 **Patient activation**

12  
13  
14  
15 A 13-item survey-based scale called the short form of the Patient Activation Measure (PAM-  
16  
17 13) that groups patients along a four-point levelling scale based on how activated patients are  
18  
19 was used to measure patient activation. It has similar reliability and validity to the 22-item  
20  
21 version across different ages, genders and health condition status.<sup>40</sup> The validity and  
22  
23 reliability of the PAM-13 has also been tested in various regions and in patients with different  
24  
25 conditions.<sup>41-44</sup> Each item of the form was scored on the 5-point Likert response scale. The  
26  
27 raw scores were transformed from the original metric to a 0–100 metric with higher scores  
28  
29 indicating higher activation levels. Based on the patient activation score, patients were  
30  
31 categorized into four levels: level 1 (score <47.0), level 2 (score 47.1–55.1), level 3 (score  
32  
33 55.2–67.0), and level 4 (score >67.0)<sup>40</sup>. The activation levels were then  
34  
35 dichotomized into low activation (Levels 1 and 2) and high activation (Levels 3 and 4) as  
36  
37 reported in previous studies.<sup>45, 46</sup>

### 38 **Data analysis**

39  
40  
41  
42 Normally distributed data are presented with mean and standard deviation (SD) as the  
43  
44 measures of central tendency and dispersion, respectively. Correspondingly, non-normally  
45  
46 distributed continuous data are presented with median and interquartile range (IQR, thus 25th  
47  
48 and 75th percentiles), respectively. All HRQoL subscales were treated as continuous  
49  
50 variables. First, the four patient activation levels were dichotomized into low activation group  
51  
52 (Levels 1 and 2) and high activation group (Levels 3 and 4). Second, chi-squared or t-tests (as  
53  
54  
55  
56  
57  
58  
59  
60

appropriate) were used to analyse differences or associations between patient and disease characteristics and patient activation. Third, using the PAM score as a continuous variable, univariable regression models were performed in which each covariate was controlled for separately to ascertain its potential importance. Covariates that reached a significance level of  $p < 0.10$  or were of clinical importance were included in stepwise backward multivariable linear regression models that investigated the factors associated with patient activation for the entire study population and stratified analyses according to gender<sup>47</sup>. Potential covariates were age, gender, subscales of HRQoL, eGFR, body mass index, SES and the composite self-care score. Confidence intervals (CIs) were reported at the 95% level and for all analyses, a  $p$  value  $< 0.05$  was considered statistically significant. Cases with missing values were not included in the analyses after checking for the amount of missing data (the rate of missing data was minimal to result in any substantial loss of statistical power,  $< 1\%$  for some variables). There was no pattern in the missing data on any variables. All analyses were performed with IBM SPSS version 22 (Armonk, NY: IBM Corp.) or Stata version 12.1 (Statacorp, College Station, TX).

## RESULTS

### Patient characteristics

A total of 3028 patients were screened, 317 studied and of those 305 included in the analyses after the exclusion of 9 patients who had their eGFR misclassified ( $> 60$  ml/min/m<sup>2</sup>) and 3 patients who had incomplete PAM data (Fig 1). There were no differences in age, gender and stage of kidney disease (for one study site) between patients who participated and those who did not participate in the study (Table S1). The baseline demographic and clinical characteristics of the study population are shown in Table 1. The median age and interquartile range (IQR) was 68 and 14.8 years respectively with 59% of the population being over 68

1  
2  
3 years old and 30% were women. The patients were evenly distributed across groups defined  
4  
5 by SES and stage of kidney disease. Approximately 20% were receiving dialysis treatment.  
6

7  
8 Patient activation scores were normally distributed across the study population (mean 57.6,  
9  
10 SD 15.5); men (mean 57.4, SD 16.0) and women patients (mean 58.1, SD 14.4) (Figure 2A  
11  
12 and B). Twenty-two percent of patients were categorised as having level 1 PA, 23.6% level 2  
13  
14 PA, 36.4% level 3 PA and 18% level 4 PA (indicating greatest activation) (Figure 3). The  
15  
16 proportions of the patients with low (levels 1 and 2) and high activation (levels 3 and 4)  
17  
18 scores were 46% and 54% respectively (Figure 3).  
19

20  
21  
22 Patients in the low activation group had significantly worse self-reported health in the burden  
23  
24 of kidney disease and mental composite summary subscales than patients in the high  
25  
26 activation group as shown in Table 1 (all  $p < 0.05$ ). No other differences between low and high  
27  
28 activation groups were found for demographic factors (age, gender and socioeconomic status)  
29  
30 and disease factors that included stage and duration of CKD, dialysis status, duration of  
31  
32 diabetes and BMI (Table 1).  
33

### 34 35 36 **Factors associated with patient activation in the study population**

37  
38  
39 On univariable analysis (Table 2), factors associated with lower activation were worse self-  
40  
41 reported health in all HRQOL subscales, greater renal impairment (lower eGFR) and lower  
42  
43 self-care scores. On multivariable analysis, older age, worse self-reported health in the  
44  
45 burden of kidney disease subscale and lower self-care scores were independently associated  
46  
47 with lower activation (Table 2).  
48

### 49 50 51 **Factors associated with patient activation stratified by gender**

52  
53  
54 Tables S2 and S3 show stratified analyses according to gender. On univariable analysis,  
55  
56 worse self-reported health in the symptom problems list, burden of kidney disease, mental  
57  
58  
59  
60

1  
2  
3 composite summary subscales and lower self-care scores were associated with lower  
4  
5 activation in men. Worse self-reported health in all HRQOL subscales and lower eGFR were  
6  
7 associated with lower activation in women. On multivariable analysis, worse self-reported  
8  
9 health in the mental composite subscale was independently associated with lower activation  
10  
11 in men, and worse self-reported health in the symptom problem list and greater renal  
12  
13 impairment (lower eGFR) were independently associated with lower activation in women.  
14  
15

## 16 17 **DISCUSSION**

18  
19 Amongst patients with co-morbid diabetes and CKD, we document for the first time in this  
20  
21 study that patient activation is low, and identify factors independently associated with lower  
22  
23 patient activation. We report significantly worse self-reported health in the burden of kidney  
24  
25 disease and mental composite subscales for patients in the low activation group compared to  
26  
27 those in the high activation group. Lower activation was also independently associated with  
28  
29 older age, having worse self-reported health in the burden of kidney disease subscale and  
30  
31 lower self-care scores across the entire study population. In men, worse self-reported health  
32  
33 in the mental composite subscale was associated with lower activation. In women worse self-  
34  
35 reported health in the symptom problem list (with symptoms including sore muscles, chest  
36  
37 pain, cramps, itchy or dry skin and shortness of breath, faintness/dizziness, and lack of  
38  
39 appetite) and greater renal impairment were associated with lower patient activation.  
40  
41  
42  
43  
44

45 The mean patient activation level was 57.6 on a theoretical scale of 0–100 and was  
46  
47 comparable to the means cited in several studies across other regions and disease  
48  
49 conditions.<sup>15, 41, 48</sup> Patient activation in patients with co-morbid diabetes and CKD was  
50  
51 generally low with close to 50% of our study population reporting low levels of activation.  
52  
53 This is greater than that of the general population where 25 to 40% have reported low  
54  
55 activation<sup>14</sup> and in patients with diabetes where 20 to 30% reported low activation.<sup>47, 49</sup>  
56  
57  
58  
59  
60

1  
2  
3 Conversely in patients with CKD alone (eGFR<60 mL/min/1.73m<sup>2</sup>), patient activation has  
4  
5 been observed to be even lower with over 65% of one study cohort <sup>17</sup> reporting low activation  
6  
7 levels. Although we expected that diabetes and CKD in combination would lead to lower  
8  
9 activation compared to either diabetes or CKD alone, our results suggest an improvement in  
10  
11 patient activation among patients with diabetes and CKD. This may be attributed to a focus  
12  
13 on self-management of diabetes. More studies are required to confirm this observation.  
14  
15

16  
17 We found that older age was independently associated with lower activation. Similar findings  
18  
19 have been reported in people with diabetes <sup>8, 16, 27</sup> other chronic diseases <sup>44, 46, 50-52</sup> and in a  
20  
21 national survey of US adults. <sup>53</sup> The reason for this could be a higher prevalence of  
22  
23 depressive symptoms and functional difficulties impairing self-management in older  
24  
25 patients. <sup>50, 51</sup> In contrast, other studies in different populations found conflicting evidence,  
26  
27 showing no direct relationship between patient activation and age. <sup>2, 54-56</sup> These  
28  
29 inconsistencies may be due to differences in clinical and demographic characteristics of the  
30  
31 populations studied. For example, it has been previously reported that younger patients with  
32  
33 CKD have poor coping strategies compared to older patients <sup>57</sup> and this may potentially lead  
34  
35 to low activation. Our results highlight a subgroup at risk of lower activation, which may  
36  
37 benefit from targeted interventions to improve activation. These interventions may include  
38  
39 encouraging younger patients to ask questions <sup>58</sup> when they attend medical appointments and  
40  
41 training their peers to lead such interventions <sup>59</sup>. Additionally, the contradictions regarding the  
42  
43 relationship between age and patient activation highlight that intervention strategies cannot  
44  
45 exclusively be based on the knowledge of patients' demographics, but should include other  
46  
47 modifiable factors as well.  
48  
49  
50  
51

52  
53 In line with previous studies of patients with conditions other than co-morbid diabetes and  
54  
55 CKD, <sup>15, 50, 53, 60-62</sup> patient activation was low in those with worse self-reported health status.  
56  
57  
58  
59  
60

1  
2  
3 Our study showed that lower mental health composite scores on KDQoL were independently  
4 associated with lower patient activation, particularly in men. This could be due to men with  
5 co-morbid disease having less ability to cope with multiple conditions than women,<sup>63</sup>  
6 resulting in lower levels of activation. Men with chronic disease may also have less coping  
7 ability because they do not seek help as often as women do.<sup>64</sup> Given the high prevalence of  
8 mental disorders such as depression in patients with CKD,<sup>65</sup> addressing mental health issues  
9 may be very important for enhancing patient activation and outcomes.  
10  
11

12  
13  
14  
15  
16  
17  
18  
19 Our data suggest that greater renal impairment in women may be associated with lower  
20 activation. The most likely explanation for this is that women tend to have lower physical  
21 functioning<sup>66,67</sup> which is associated with lower patient activation<sup>62</sup> even in the early stages of  
22 CKD.<sup>17,53</sup> Another plausible explanation is that women may receive less support from their  
23 care givers compared to men due to caregiver stress and fatigue<sup>68</sup> associated with managing  
24 chronic diseases. The lack of support in managing chronic diseases may lead to lower  
25 activation among women. Additionally, due to the complexity of diabetes and CKD, there is  
26 limited time to address all patient needs resulting in lower quality medical care for discordant  
27 conditions.<sup>69</sup>  
28  
29  
30  
31  
32  
33  
34  
35  
36  
37  
38  
39

40 Interestingly, we did not find a significant association between SES and patient activation.  
41 This is in contrast to other studies that have reported patient activation to vary by SES with  
42 individuals from lower SES groups reported as less activated than those from higher SES  
43 groups.<sup>6,14</sup> These discordant findings could be attributable to our use of postcode as a  
44 surrogate for SES, which may not accurately represent SES.  
45  
46  
47  
48  
49  
50

### 51 **Strengths and limitations**

52  
53  
54  
55 Our findings should be interpreted in light of the strengths and limitations of our study design.  
56 The strengths include the inclusion of several biologic and non-biological patient variables  
57  
58  
59  
60

1  
2  
3 such as gender, age, SES, HRQoL, BMI and disease duration as potential factors influencing  
4  
5 patient activation since the determinants are likely to be multifactorial. The study was  
6  
7 conducted across multiple sites increasing the generalizability of the findings<sup>70</sup> and we also  
8  
9 used validated and disease-specific instruments for measuring HRQoL (KDQoL<sup>TM</sup>-36) and  
10  
11 patient activation (PAM 13<sup>TM</sup>). The limitations include that our findings may not be  
12  
13 generalised to culturally and linguistically diverse (CALD) populations. The cross sectional  
14  
15 design of the study did not permit assessment of temporal effects or the potential for reverse  
16  
17 causality with low activation causing poor health. Longitudinal studies are needed to better  
18  
19 understand the effects over time of factors influencing patient activation in this population.  
20  
21

## 22 23 24 **Conclusions**

25  
26 In conclusion, in patients with co-morbid diabetes and CKD patient activation was low, with  
27  
28 almost half of patients reporting low activation. Older age and worse self-reported health  
29  
30 were associated with lower activation. This data may serve as the basis for the development  
31  
32 of interventions needed to enhance activation and outcomes for patients with diabetes and  
33  
34 CKD.  
35  
36  
37  
38  
39  
40  
41  
42

## 43 44 **Acknowledgements**

45 We acknowledge S Chaviaras, D Giannopoulos, R McGrath and S Coggan for help in study  
46  
47 conduct.  
48

## 49 50 **Contributors**

51  
52 EZ, CL and SZ conceptualised the study. EZ, CL, SR and SZ performed data curation. EZ  
53  
54 designed the analysis in consultation with CL, SR, GF, SJ, PK, KP, GR, RW, and SZ. EZ  
55  
56 drafted the original draft and all authors reviewed and edited the final manuscript.  
57  
58  
59  
60



**Conflicts of Interest**

The authors declare no conflicts of interest in relation to this work.

**Ethics approval**

Approval for the Diabetes Renal Project (DRP) was obtained from Monash University, Monash Health, Alfred Health, Royal North Shore Hospital and Concord Hospital.

**Data sharing statement**

Data for the DRP study can be shared for specific research questions that are available from the corresponding author on request.

**Funding**

This work was supported by a National Health and Medical Research Council, Australia (NHMRC) Partnership Grant (ID 1055175) between the following health services, research institutes and national consumer stakeholder groups – Alfred Health; Concord Hospital; Royal North Shore Hospital; Monash Health; Monash Centre for Health Research and Implementation, Monash University; The George Institute for Global Health, University of Sydney; Diabetes Australia; and Kidney Health Australia. An Australian Postgraduate Award Scholarship supported C Lo. H Teede was supported by a NHMRC, Practitioner Fellowship. S Zoungas was supported by a NHMRC Senior Research Fellowship.

## References

1. Hibbard JH, Greene J, Becker ER, et al. Racial/ethnic disparities and consumer activation in health. *Health affairs (Project Hope)*. 2008;27(5):1442-53.
2. Alegria M, Sribney W, Perez D, Laderman M, Keefe K. The role of patient activation on patient-provider communication and quality of care for US and foreign born Latino patients. *J Gen Intern Med*. 2009;24 Suppl 3:534-41.
3. Hibbard JH, Stockard J, Mahoney ER, Tusler M. Development of the Patient Activation Measure (PAM): conceptualizing and measuring activation in patients and consumers. *Health services research*. 2004;39(4 Pt 1):1005-26.
4. Donald M, Ware RS, Ozolins IZ, Begum N, Crowther R, Bain C. The role of patient activation in frequent attendance at primary care: a population-based study of people with chronic disease. *Patient Educ Couns*. 2011;83(2):217-21.
5. Kim JY, Wineinger NE, Steinhubl SR. The Influence of Wireless Self-Monitoring Program on the Relationship Between Patient Activation and Health Behaviors, Medication Adherence, and Blood Pressure Levels in Hypertensive Patients: A Substudy of a Randomized Controlled Trial. *Journal of medical Internet research*. 2016;18(6):e116.
6. Greene J, Hibbard JH. Why does patient activation matter? An examination of the relationships between patient activation and health-related outcomes. *J Gen Intern Med*. 2012;27(5):520-6.
7. Rask KJ, Ziemer DC, Kohler SA, Hawley JN, Arinde FJ, Barnes CS. Patient activation is associated with healthy behaviors and ease in managing diabetes in an indigent population. *Diabetes Educ*. 2009;35(4):622-30.
8. Begum N, Donald M, Ozolins IZ, Dower J. Hospital admissions, emergency department utilisation and patient activation for self-management among people with diabetes. *Diabetes research and clinical practice*. 2011;93(2):260-7.
9. Remmers C, Hibbard J, Mosen DM, Wagenfield M, Hoyer RE, Jones C. Is patient activation associated with future health outcomes and healthcare utilization among patients with diabetes? *J Ambul Care Manage*. 2009;32(4):320-7.
10. Thiboutot J, Stuckey H, Binette A, et al. A web-based patient activation intervention to improve hypertension care: study design and baseline characteristics in the web hypertension study. *Contemporary clinical trials*. 2010;31(6):634-46.
11. Olomu A, Khan NNS, Todem D, et al. Blood Pressure Control in Hypertensive Patients in Federally Qualified Health Centers: Impact of Shared Decision Making in the Office-GAP Program. *MDM Policy & Practice*. 2016;1(1).
12. Johnson ML, Zimmerman L, Welch JL, Hertzog M, Pozehl B, Plumb T. Patient activation with knowledge, self-management and confidence in chronic kidney disease. *Journal of renal care*. 2016;42(1):15-22.
13. Winterbottom A, Bekker H, Mooney A. Dialysis modality selection: physician guided or patient led? *Clin Kidney J*. 2016;9(6):823-5.
14. Hibbard JH, Cunningham PJ. How engaged are consumers in their health and health care, and why does it matter? *Res Brief*. 2008(8):1-9.
15. Skolasky RL, Green AF, Scharfstein D, Boulton C, Reider L, Wegener ST. Psychometric properties of the patient activation measure among multimorbid older adults. *Health services research*. 2011;46(2):457-78.
16. Hendriks M, Rademakers J. Relationships between patient activation, disease-specific knowledge and health outcomes among people with diabetes; a survey study. *BMC health services research*. 2014;14:393.
17. Bos-Touwen I, Schuurmans M, Monnikhof EM, et al. Patient and disease characteristics associated with activation for self-management in patients with diabetes, chronic obstructive

- 1  
2  
3 pulmonary disease, chronic heart failure and chronic renal disease: a cross-sectional survey study.  
4 PloS one. 2015;10(5):e0126400.
- 5 18. Association CD. 2008 clinical practice guidelines for the prevention and management of  
6 diabetes in Canada 2008.
- 7 19. Trisolini M, Roussel A, Zerhusen E, et al. Activating chronic kidney disease patients and  
8 family members through the Internet to promote integration of care. *Int J Integr Care*. 2004;4:e17.
- 9 20. Al Shamsi S, Al Dhanhani A, Sheek-Hussein MM, Bakoush O. Provision of care for chronic  
10 kidney disease by non-nephrologists in a developing nation: a national survey. *BMJ Open*.  
11 2016;6(8):e010832.
- 12 21. Bower P, Harkness E, Macdonald W, Coventry P, Bundy C, Moss-Morris R. Illness  
13 representations in patients with multimorbid long-term conditions: qualitative study. *Psychology &*  
14 *health*. 2012;27(10):1211-26.
- 15 22. Morris RL, Sanders C, Kennedy AP, Rogers A. Shifting priorities in multimorbidity: a  
16 longitudinal qualitative study of patient's prioritization of multiple conditions. *Chronic illness*.  
17 2011;7(2):147-61.
- 18 23. Fishbane S, Hazzan AD, Halinski C, Mathew AT. Challenges and opportunities in late-stage  
19 chronic kidney disease. *Clinical Kidney Journal*. 2015;8(1):54-60.
- 20 24. Holman H, Lorig K. Patients as partners in managing chronic disease. Partnership is a  
21 prerequisite for effective and efficient health care. *BMJ (Clinical research ed)*. 2000;320(7234):526-7.
- 22 25. Lo C, Ilic D, Teede H, et al. The Perspectives of Patients on Health-Care for Co-Morbid  
23 Diabetes and Chronic Kidney Disease: A Qualitative Study. *PloS one*. 2016;11(1):e0146615.
- 24 26. World Health Organization. Definition and diagnosis of diabetes mellitus and intermediate  
25 hyperglycemia: Report of a WHO/IDF Consultation. Geneva; 2006.
- 26 27. Agrawal V, Jaar BG, Frisby XY, et al. Access to health care among adults evaluated for CKD:  
27 findings from the Kidney Early Evaluation Program (KEEP). *American journal of kidney diseases : the*  
28 *official journal of the National Kidney Foundation*. 2012;59(3 Suppl 2):S5-15.
- 29 28. Kidney Disease: Improving Global Outcomes (KDIGO) CKD Work Group. KDIGO 2012 clinical  
30 practice guideline for the evaluation and management of chronic kidney disease. *Kidney*  
31 *International Supplements*. 2012;3(1):1.
- 32 29. Resnick HE, Foster GL, Bardsley J, Ratner RE. Achievement of American Diabetes Association  
33 clinical practice recommendations among U.S. adults with diabetes, 1999-2002: the National Health  
34 and Nutrition Examination Survey. *Diabetes care*. 2006;29(3):531-7.
- 35 30. Johnson DW, Jones GR, Mathew TH, et al. Chronic kidney disease and automatic reporting of  
36 estimated glomerular filtration rate: new developments and revised recommendations. *The Medical*  
37 *journal of Australia*. 2012;197(4):224-5.
- 38 31. Andrassy KM. Comments on 'KDIGO 2012 Clinical Practice Guideline for the Evaluation and  
39 Management of Chronic Kidney Disease'. *Kidney international*. 2013;84(3):622-3.
- 40 32. Toobert DJ, Hampson SE, Glasgow RE. The summary of diabetes self-care activities measure:  
41 results from 7 studies and a revised scale. *Diabetes care*. 2000;23(7):943-50.
- 42 33. Freitas S, Freitas da Silva G, Neta D, Vilarouca da Silva A. Analysis of the self-care of diabetics  
43 according to by the Summary of Diabetes Self-Care Activities Questionnaire (SDSCA) *Acta*  
44 *Scientiarum Health Sciences* 2014;36(1):73-81.
- 45 34. Jalaludin M, Fuziah M, Hong J, Mohamad Adam B, Jamaiyah H. Reliability and Validity of the  
46 Revised Summary of Diabetes Self-Care Activities (SDSCA) for Malaysian Children and Adolescents.  
47 *Malaysian Family Physician*. 2012;7(2&3):10-20.
- 48 35. AlJohani KA, Kendall GE, Snider PD. Psychometric Evaluation of the Summary of Diabetes  
49 Self-Care Activities-Arabic (SDSCA-Arabic): Translation and Analysis Process. *J Transcult Nurs*. 2014.
- 50 36. Hareri HA AM. Assessments of Adherence to Hypertension Medications and Associated  
51 Factors among Patients Attending Tikur Anbessa Specialized Hospital Renal Unit, Addis Ababa,  
52 Ethiopia 2012. *International Journal of Nursing Science*. 2013;3(1):6.
- 53  
54  
55  
56  
57  
58  
59  
60

- 1  
2  
3 37. Chow SKY, Tam BML. Is the kidney disease quality of life-36 (KDQOL-36) a valid instrument  
4 for Chinese dialysis patients? *BMC nephrology*. 2014;15(1):199.
- 5 38. Ricardo AC, Hacker E, Lora CM, et al. Validation of the Kidney Disease Quality of Life Short  
6 Form 36 (KDQOL-36) US Spanish and English versions in a cohort of Hispanics with chronic kidney  
7 disease. *Ethnicity & disease*. 2013;23(2):202-9.
- 8 39. Chao S, Yen M, Lin TC, Sung JM, Wang MC, Hung SY. Psychometric Properties of the Kidney  
9 Disease Quality of Life-36 Questionnaire (KDQOL-36). *Western journal of nursing research*.  
10 2016;38(8):1067-82.
- 11 40. Hibbard JH, Mahoney ER, Stockard J, Tusler M. Development and testing of a short form of  
12 the patient activation measure. *Health services research*. 2005;40(6 Pt 1):1918-30.
- 13 41. Rademakers J, Nijman J, van der Hoek L, Heijmans M, Rijken M. Measuring patient activation  
14 in The Netherlands: translation and validation of the American short form Patient Activation  
15 Measure (PAM13). *BMC Public Health*. 2012;12:577.
- 16 42. Zill JM, Dwinger S, Kriston L, Rohenkohl A, Harter M, Dirmaier J. Psychometric evaluation of  
17 the German version of the Patient Activation Measure (PAM13). *BMC Public Health*. 2013;13:1027.
- 18 43. Prey JE, Qian M, Restaino S, et al. Reliability and validity of the patient activation measure in  
19 hospitalized patients. *Patient Educ Couns*. 2016;99(12):2026-33.
- 20 44. Graffigna G, Barello S, Bonanomi A, Lozza E, Hibbard J. Measuring patient activation in Italy:  
21 Translation, adaptation and validation of the Italian version of the patient activation measure 13  
22 (PAM13-I). *BMC medical informatics and decision making*. 2015;15:109.
- 23 45. Aung E, Donald M, Williams GM, Coll JR, Doi SAR. Joint influence of patient-assessed chronic  
24 illness care and patient activation on glycaemic control in type 2 diabetes. *International Journal for  
25 Quality in Health Care*. 2015;27(2):117-24.
- 26 46. Ahn YH, Kim BJ, Ham OK, Kim SH. Factors associated with Patient Activation for Self-  
27 management among Community Residents with Osteoarthritis in Korea. *J Korean Acad Community  
28 Health Nurs*. 2015;26(3):303-11.
- 29 47. Hendriks SH, Hartog LC, Groenier KH, et al. Patient Activation in Type 2 Diabetes: Does It  
30 Differ between Men and Women? *Journal of diabetes research*. 2016;2016:7386532.
- 31 48. Nijman J, Hendriks M, Brabers A, de Jong J, Rademakers J. Patient activation and health  
32 literacy as predictors of health information use in a general sample of Dutch health care consumers.  
33 *Journal of health communication*. 2014;19(8):955-69.
- 34 49. Aung E, Donald M, Coll JR, Williams GM, Doi SA. Association between patient activation and  
35 patient-assessed quality of care in type 2 diabetes: results of a longitudinal study. *Health  
36 expectations : an international journal of public participation in health care and health policy*.  
37 2016;19(2):356-66.
- 38 50. Blakemore A, Hann M, Howells K, et al. Patient activation in older people with long-term  
39 conditions and multimorbidity: correlates and change in a cohort study in the United Kingdom. *BMC  
40 health services research*. 2016;16(1):582.
- 41 51. Gleason KT, Tanner EK, Boyd CM, Saczynski JS, Szanton SL. Factors associated with patient  
42 activation in an older adult population with functional difficulties. *Patient Educ Couns*.  
43 2016;99(8):1421-6.
- 44 52. Ryvicker M, Feldman PH, Chiu YL, Gerber LM. The role of patient activation in improving  
45 blood pressure outcomes in Black patients receiving home care. *Medical care research and review :  
46 MCRR*. 2013;70(6):636-52.
- 47 53. Smith SG, Pandit A, Rush SR, Wolf MS, Simon CJ. The Role of Patient Activation in  
48 Preferences for Shared Decision Making: Results From a National Survey of U.S. Adults. *Journal of  
49 health communication*. 2016;21(1):67-75.
- 50 54. Do V, Young L, Barnason S, Tran H. Relationships between activation level, knowledge, self-  
51 efficacy, and self-management behavior in heart failure patients discharged from rural hospitals.  
52 *F1000Research*. 2015;4:150.
- 53  
54  
55  
56  
57  
58  
59  
60

- 1  
2  
3 55. Fowles JB, Terry P, Xi M, Hibbard J, Bloom CT, Harvey L. Measuring self-management of  
4 patients' and employees' health: further validation of the Patient Activation Measure (PAM) based  
5 on its relation to employee characteristics. *Patient Educ Couns*. 2009;77(1):116-22.  
6  
7 56. Lubetkin EI, Lu WH, Gold MR. Levels and correlates of patient activation in health center  
8 settings: building strategies for improving health outcomes. *Journal of health care for the poor and*  
9 *underserved*. 2010;21(3):796-808.  
10 57. Abdel-Kader K, Myaskovsky L, Karpov I, et al. Individual quality of life in chronic kidney  
11 disease: influence of age and dialysis modality. *Clinical journal of the American Society of*  
12 *Nephrology : CJASN*. 2009;4(4):711-8.  
13 58. Deen D, Lu WH, Rothstein D, Santana L, Gold MR. Asking questions: the effect of a brief  
14 intervention in community health centers on patient activation. *Patient Educ Couns*. 2011;84(2):257-  
15 60.  
16 59. Druss BG, Zhao L, von Esenwein SA, et al. The Health and Recovery Peer (HARP) Program: a  
17 peer-led intervention to improve medical self-management for persons with serious mental illness.  
18 *Schizophrenia research*. 2010;118(1-3):264-70.  
19 60. Magnezi R, Glasser S, Shalev H, Sheiber A, Reuveni H. Patient activation, depression and  
20 quality of life. *Patient Education and Counseling*. 2014;94(3):432-7.  
21 61. Hadgkiss EJ, Jelinek GA, Taylor KL, et al. Engagement in a program promoting lifestyle  
22 modification is associated with better patient-reported outcomes for people with MS. *Neurological*  
23 *sciences : official journal of the Italian Neurological Society and of the Italian Society of Clinical*  
24 *Neurophysiology*. 2015;36(6):845-52.  
25 62. Mosen DM, Schmittiel J, Hibbard J, Sobel D, Remmers C, Bellows J. Is patient activation  
26 associated with outcomes of care for adults with chronic conditions? *J Ambul Care Manage*.  
27 2007;30(1):21-9.  
28 63. Chamie K, Connor SE, Maliski SL, Fink A, Kwan L, Litwin MS. Prostate cancer survivorship:  
29 lessons from caring for the uninsured. *Urologic oncology*. 2012;30(1):102-8.  
30 64. Cheshire A, Peters D, Ridge D. How do we improve men's mental health via primary care? An  
31 evaluation of the Atlas Men's Well-being Pilot Programme for stressed/distressed men. *BMC Family*  
32 *Practice*. 2016;17(1):13.  
33 65. Hedayati SS, Minhajuddin AT, Toto RD, Morris DW, Rush AJ. Prevalence of major depressive  
34 episode in CKD. *American journal of kidney diseases : the official journal of the National Kidney*  
35 *Foundation*. 2009;54(3):424-32.  
36 66. Mujais SK, Story K, Brouillette J, et al. Health-related quality of life in CKD Patients: correlates  
37 and evolution over time. *Clinical journal of the American Society of Nephrology : CJASN*.  
38 2009;4(8):1293-301.  
39 67. Zimbudzi E, Lo C, Ranasinha S, et al. Predictors of Health-Related Quality of Life in Patients  
40 with Co-Morbid Diabetes and Chronic Kidney Disease. *PloS one*. 2016;11(12):e0168491.  
41 68. Pinquart M, Sorensen S. Correlates of physical health of informal caregivers: a meta-analysis.  
42 *The journals of gerontology Series B, Psychological sciences and social sciences*. 2007;62(2):P126-37.  
43 69. Piette JD, Kerr EA. The impact of comorbid chronic conditions on diabetes care. *Diabetes*  
44 *care*. 2006;29(3):725-31.  
45 70. Gold JL, Dewa CS. Institutional review boards and multisite studies in health services  
46 research: is there a better way? *Health services research*. 2005;40(1):291-307.  
47  
48  
49  
50  
51  
52  
53  
54  
55  
56  
57  
58  
59  
60

**Table 1:** Patient characteristics by activation status (N=305)

|                                               | Patient activation status |                  | <i>p</i> -value <sup>1</sup> |
|-----------------------------------------------|---------------------------|------------------|------------------------------|
|                                               | Low level N (%)           | High level N (%) |                              |
| Age                                           |                           |                  |                              |
| <68 years                                     | 68 (49.3)                 | 88 (53.3)        | 0.48                         |
| ≥68 years                                     | 70 (50.7)                 | 77 (46.7)        |                              |
| Gender                                        |                           |                  |                              |
| Women                                         | 42 (30.4)                 | 51 (30.9)        | 0.93                         |
| Men                                           | 96 (69.6)                 | 114 (69.1)       |                              |
| Socio-economic status <sup>2</sup> , n: (%)   |                           |                  | 0.86                         |
| Upper                                         | 24 (17.4)                 | 34 (20.6)        |                              |
| Upper middle                                  | 32 (23.2)                 | 31 (18.8)        |                              |
| Lower middle                                  | 27 (19.6)                 | 34 (20.6)        |                              |
| Upper lower                                   | 28 (20.3)                 | 31 (18.8)        |                              |
| Lower                                         | 27 (19.6)                 | 35 (21.2)        |                              |
| CKD <sup>3</sup> duration in years: mean (SD) | 8.8 (9.6)                 | 9.2 (11.6)       | 0.74                         |
| Stage of CKD <sup>4</sup>                     |                           |                  | 0.86                         |
| 3a                                            | 30 (21.7)                 | 42 (25.5)        |                              |
| 3b                                            | 35 (25.4)                 | 42 (25.5)        |                              |
| 4                                             | 34 (24.6)                 | 40 (24.2)        |                              |
| 5                                             | 39 (28.3)                 | 41 (24.8)        |                              |
| Diabetes duration in years: mean (SD)         | 17.1 (12.0)               | 18.2 (11.8)      | 0.40                         |
| Body mass index: mean, n: (%)                 |                           |                  |                              |
| Underweight                                   | 1 (1.4)                   | 1 (1.2)          | 0.60                         |
| Health weight                                 | 17 (24.3)                 | 15 (17.4)        |                              |
| Overweight                                    | 21 (30.0)                 | 23 (26.7)        |                              |
| Obese                                         | 47 (67.1)                 | 31 (36.0)        |                              |
| Dialysis status                               |                           |                  |                              |
| Current                                       | 29 (21.0)                 | 30 (18.2)        | 0.54                         |
| Predialysis                                   | 109 (79.0)                | 135 (81.8)       |                              |
| HRQOL <sup>5</sup> : mean (SD)                |                           |                  |                              |
| Symptom/problem list                          | 72.0 (17.6)               | 75.5 (17.4)      | 0.08                         |
| Effect of kidney disease                      | 71.0 (23.5)               | 74.1 (23.6)      | 0.27                         |
| Burden of kidney disease                      | 55.9 (29.5)               | 63.3 (31.9)      | 0.04                         |
| Physical composite summary                    | 34.4 (11.3)               | 36.0 (11.0)      | 0.26                         |
| Mental composite summary                      | 45.5 (10.5)               | 48.3 (11.0)      | 0.03                         |

Data are presented in N (%) unless otherwise indicated. <sup>1</sup> T-test for mean differences and chi-square test for differences in proportions; <sup>2</sup> Socio-economic status was estimated using the Australian Bureau of Statistics data. Postcodes were coded according to the Index of Relative Social Disadvantage, a composite measure based on selected census variables, which include income, educational attainment and employment status, <sup>3</sup> chronic kidney disease, <sup>4</sup> Stage of CKD-Stage 5 CKD included patients on dialysis (n=59) and not on dialysis (n=21) <sup>5</sup> Health related quality of life

**Table 2:** Univariable and multivariable regression model for factors associated with low activation in the study population

| Variables                               | Univariable<br>B (95% CI) | Multivariable<br>B (95% CI) |
|-----------------------------------------|---------------------------|-----------------------------|
| Age                                     | -0.05 (-0.22 to 0.11)     | -0.18 (-0.35 to -0.01)*     |
| <i>Gender</i>                           |                           |                             |
| Men                                     | Ref                       | Ref                         |
| Women                                   | -0.79 (-4.59 to 3.02)     | -                           |
| <i>Health related quality of life</i>   |                           |                             |
| Symptom problem list                    | 0.15 (0.05 to 0.25)**     | -                           |
| Effects of kidney disease               | 0.09 (0.02 to 0.17)*      | -                           |
| Burden of kidney disease                | 0.11 (0.05 to 0.16)***    | 0.11 (0.05 to 0.17)***      |
| Physical composite summary              | 0.17 (0.01 to 0.33)*      | -                           |
| Mental composite summary                | 0.26 (0.09 to 0.42)**     | -                           |
| Duration of diabetes                    | -0.02 (-0.17 to 0.13)     | -                           |
| Duration of kidney disease              | 0.07 (-0.11 to 0.25)      | -                           |
| eGFR <sup>1</sup>                       | 0.11 (0.00 to 0.21)*      | 0.01 (-0.12 to 0.15)        |
| <i>Body mass index</i>                  |                           |                             |
| Healthy weight <sup>2</sup>             | Ref                       | Ref                         |
| Overweight                              | -2.78 (-7.75 to 2.20)     | -                           |
| Obese                                   | 1.98 (-2.03 to 5.99)      | -                           |
| <i>Socioeconomic status<sup>3</sup></i> |                           |                             |
| Lower                                   | Ref                       | Ref                         |
| Lower middle                            | -0.31 (-4.75 to 4.12)     | -                           |
| Upper lower                             | -1.42 (-5.80 to 2.95)     | -                           |
| Upper middle                            | -0.95 (-5.27 to 3.38)     | -                           |
| Upper                                   | 3.17 (-1.28 7.62)         | -                           |
| Self-care composite score               | 0.21 (0.06 to 0.37)**     | 0.18 (0.02 to 0.35)*        |

\*p<0.05; \*\*p<0.01, \*\*\*p<0.001; 1-per 1ml/min increase in eGFR; 2-due to small numbers of underweight patients (N=2), the underweight group was combined with the health weight group for this analysis; 3-Socio-economic status was estimated using the Australian Bureau of Statistics data. Postcodes were coded according to the Index of Relative Social Disadvantage (IRSD), a composite measure based on selected census variables, which include income, educational attainment and employment status.

1  
2  
3  
4  
5  
6  
7  
8  
9  
10  
11  
12  
13  
14  
15  
16  
17  
18  
19  
20  
21  
22  
23  
24  
25  
26  
27  
28  
29  
30  
31  
32  
33  
34  
35  
36  
37  
38  
39  
40  
41  
42  
43  
44  
45  
46  
47  
48  
49  
50  
51  
52  
53  
54  
55  
56  
57  
58  
59  
60

For peer review only

**Figure 1:** Patient inclusion flow diagram



1  
2  
3  
4  
5  
6  
7  
8  
9  
10  
11  
12  
13  
14  
15  
16  
17  
18  
19  
20  
21  
22  
23  
24  
25  
26  
27  
28  
29  
30  
31  
32  
33  
34  
35  
36  
37  
38  
39  
40  
41  
42  
43  
44  
45  
46  
47  
48  
49  
50  
51  
52  
53  
54  
55  
56  
57  
58  
59  
60

For peer review only

**Figure 2:** Patient activation. Distribution of patient activation from (A) the study population (mean 57.6, SD 15.5) and (B) men (mean 57.4, SD 16.0) and women patients (mean 58.1, SD 14.4)

1  
2  
3  
4  
5  
6  
7  
8  
9  
10  
11  
12  
13  
14  
15  
16  
17  
18  
19  
20  
21  
22  
23  
24  
25  
26  
27  
28  
29  
30  
31  
32  
33  
34  
35  
36  
37  
38  
39  
40  
41  
42  
43  
44  
45  
46  
47  
48  
49  
50  
51  
52  
53  
54  
55  
56  
57  
58  
59  
60

For peer review only

**Figure 3:** Distribution of participants across the four levels of patient activation. Level 1 (score of 0.0–47.0) indicates that a person may not yet understand that their role as a patient is important. Level 2 (47.1– 55.1) indicates that a person lacks the confidence and knowledge to take action. Level 3 (55.2– 67) indicates that a person is beginning to take action and level 4 (67.1–100) indicates that a person is proactive about health and engages in many recommended health behaviors

1  
2  
3  
4  
5  
6  
7  
8  
9  
10  
11  
12  
13  
14  
15  
16  
17  
18  
19  
20  
21  
22  
23  
24  
25  
26  
27  
28  
29  
30  
31  
32  
33  
34  
35  
36  
37  
38  
39  
40  
41  
42  
43  
44  
45  
46  
47  
48  
49  
50  
51  
52  
53  
54  
55  
56  
57  
58  
59  
60

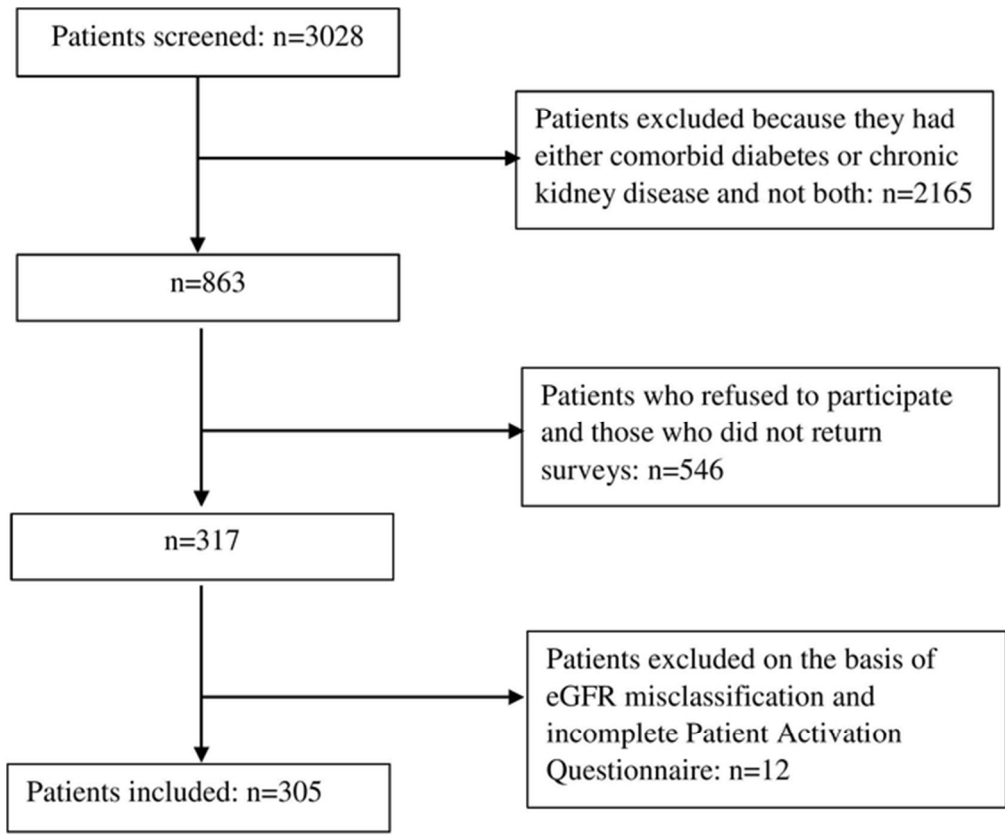

Patient inclusion flow diagram

58x48mm (300 x 300 DPI)

view only

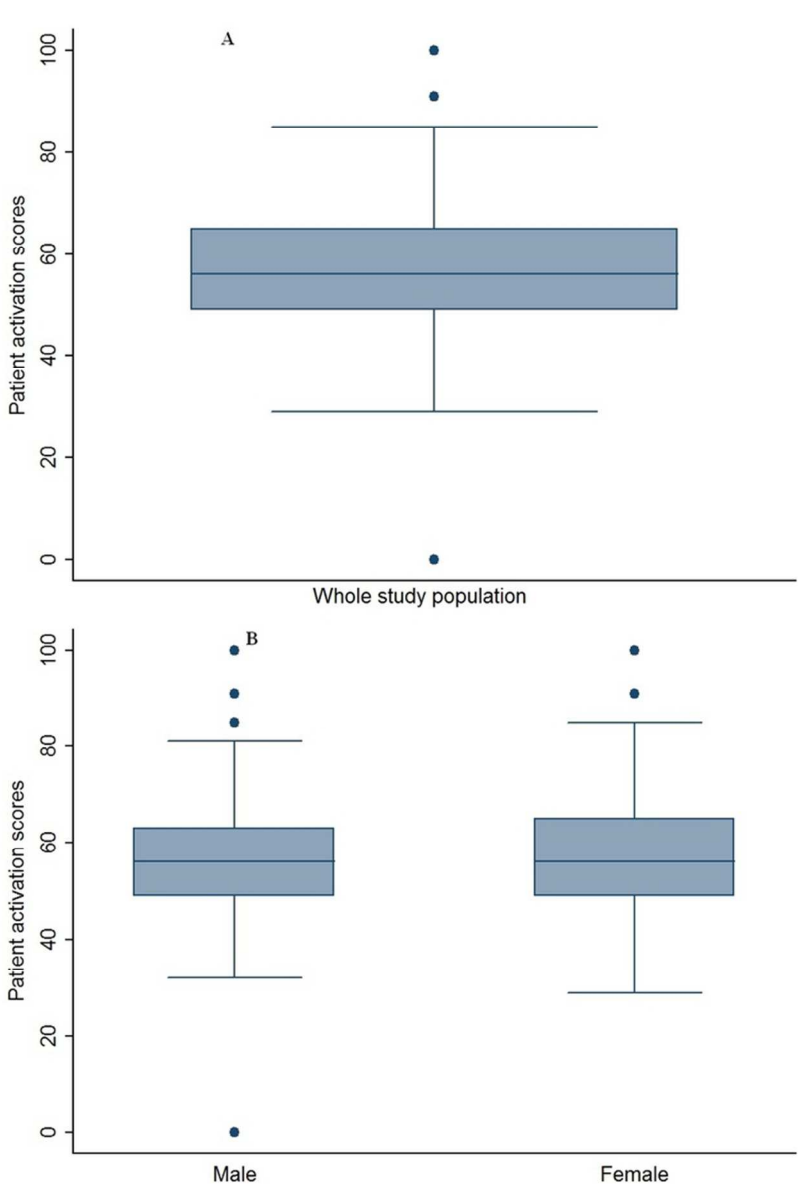

Patient activation. Patient activation. Distribution of patient activation from (A) the study population (mean 57.6, SD 15.5) and (B) men (mean 57.4, SD 16.0) and women patients (mean 58.1, SD 14

63x92mm (300 x 300 DPI)

1  
2  
3  
4  
5  
6  
7  
8  
9  
10  
11  
12  
13  
14  
15  
16  
17  
18  
19  
20  
21  
22  
23  
24  
25  
26  
27  
28  
29  
30  
31  
32  
33  
34  
35  
36  
37  
38  
39  
40  
41  
42  
43  
44  
45  
46  
47  
48  
49  
50  
51  
52  
53  
54  
55  
56  
57  
58  
59  
60

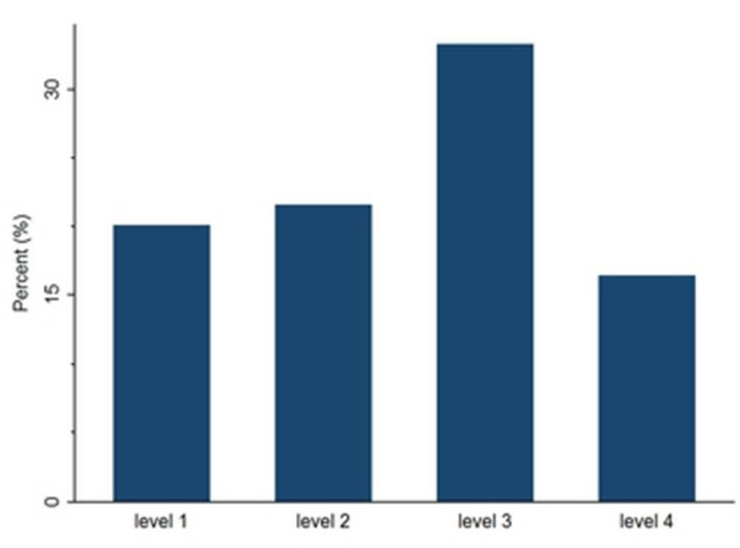

Distribution of participants across the four levels of patient activation. Level 1 (score of 0.0–47.0) indicates that a person may not yet understand that their role as a patient is important. Level 2 (47.1– 55.1) indicates that a person lacks the confidence and knowledge to take action. Level 3 (55.2– 67) indicates that a person is beginning to take action and level 4 (67.1–100) indicates that a person is proactive about health and engages in many recommended health behaviors

31x23mm (300 x 300 DPI)

view only

**S1:** Characteristics of patients who did and did not participate in the study at one hospital site

|                     | <b>Responders</b> | <b>Non-responders</b> | <b>p-value</b> |
|---------------------|-------------------|-----------------------|----------------|
| Patient numbers (n) | 127               | 243                   |                |
| Age (SD)            | 66.6 (10.8)       | 68.9 (11.9)           | 0.06           |
| Gender (Female)     | 30.7              | 39.5                  | 0.10           |
| CKD stage (KDOQI %) |                   |                       |                |
| 3                   | 34.2              | 40.9                  |                |
| 4                   | 25.2              | 25.5                  |                |
| 5                   | 33.9              | 40.3                  | 0.37           |

KDOQI-Kidney Disease Outcomes Quality Initiative classification of stages of chronic kidney disease

**S2:** Univariable and multivariable regression model for factors associated with low activation in men with diabetes and chronic kidney disease

| Variables                                | Univariable<br>B (95% CI) | Multivariable<br>B (95% CI) |
|------------------------------------------|---------------------------|-----------------------------|
| Age                                      | -0.11 (-0.32 to 0.12)     | -                           |
| <i>Health related quality of life</i>    |                           |                             |
| Symptom problem list                     | 0.12 (0.04 to 0.25)*      | -                           |
| Effects of kidney disease                | 0.04 (-0.05 to 0.13)      | -                           |
| Burden of kidney disease                 | 0.08 (0.01 to 0.15)*      | -                           |
| Physical composite summary               | 0.06 (-0.15 to 0.26)      | -                           |
| Mental composite summary                 | 0.23 (0.03 to 0.43)*      | 0.23 (0.02 to 0.44)*        |
| Duration of diabetes                     | 0.01 (-0.17 to 0.20)      | -                           |
| Duration of kidney disease               | 0.10 (-0.12 to 0.16)      | -                           |
| eGFR                                     | 0.03 (-0.12 to 0.16)      | -                           |
| <i>Body mass index</i>                   |                           |                             |
| Healthy weight <sup>1</sup>              | Ref                       | Ref                         |
| Overweight                               | -5.08 (-10.96 to 0.80)    | -                           |
| Obese                                    | 2.87 (-2.08 to 7.81)      | -                           |
| <i>Socioeconomic status <sup>2</sup></i> |                           |                             |
| Lower                                    | Ref                       | Ref                         |
| Lower middle                             | 0.41 (-5.04 to 5.85)      | -                           |
| Upper lower                              | -0.63 (-5.98 to 4.73)     | -                           |
| Upper middle                             | -2.23 (-7.37 to 2.92)     | -                           |
| Upper                                    | 4.65 (-1.04 to 10.33)*    | -                           |
| Self-care composite score                | 0.21 (0.01 to 0.40)*      | -                           |

\*p<0.05; \*\*p<0.01, \*\*\*p<0.001; 1-due to small numbers of underweight patients (N=2), the underweight group was combined with the healthy weight group for this analysis; 2-Socio-economic status was estimated using the Australian Bureau of Statistics data. Postcodes were coded according to the Index of Relative Social Disadvantage, a composite measure based on selected census variables, which include income, educational attainment and employment status.

**S3:** Univariable and multivariable regression model for factors associated with low activation in women with diabetes and chronic kidney disease

| Variables                                | Univariable<br>B (95% CI) | Multivariable<br>B (95% CI) |
|------------------------------------------|---------------------------|-----------------------------|
| Age                                      | 0.02 (-0.21 to 0.26)      | -                           |
| <i>Health related quality of life</i>    |                           |                             |
| Symptom problem list                     | 0.21 (0.06 to 0.36)**     | 0.2 (0.05 to 0.35)**        |
| Effects of kidney disease                | 0.21 (0.09 to 0.33)**     | -                           |
| Burden of kidney disease                 | 0.18 (0.09 to 0.27)***    | -                           |
| Physical composite summary               | 0.45 (0.19 to 0.71)**     | -                           |
| Mental composite summary                 | 0.33 (0.05 to 0.60)*      | -                           |
| Duration of diabetes                     | -0.09 (-0.35 to 0.17)     | -                           |
| Duration of kidney disease               | 0.02 (-0.31 to 0.27)      | -                           |
| eGFR                                     | 0.27 (0.10 to 0.43)**     | 0.27 (0.11 to 0.44)**       |
| <i>Body mass index</i>                   |                           |                             |
| Healthy weight <sup>1</sup>              | Ref                       | Ref                         |
| Overweight                               | 4.85 (-4.75 to 14.40)     | -                           |
| Obese                                    | -0.66 (-7.00 to 6.87)     | -                           |
| <i>Socioeconomic status <sup>2</sup></i> |                           |                             |
| Lower                                    | Ref                       | Ref                         |
| Lower middle                             | -1.99 (-9.71 to 5.73)     | -                           |
| Upper lower                              | -3.33 (-11.03 to 4.38)    | -                           |
| Upper middle                             | -3.40 (-4.93 to 11.73)    | -                           |
| Upper                                    | 0.27 (-6.88 to 7.42)      | -                           |
| Self-care composite score                | 0.23 (-0.06 to 0.53)      | -                           |

p<0.05; \*\*p<0.01, \*\*\*p<0.001; 1-due to small numbers of underweight patients (N=2), the underweight group was combined with the healthy weight group for this analysis; 2-Socio-economic status was estimated using the Australian Bureau of Statistics data. Postcodes were coded according to the Index of Relative Social Disadvantage, a composite measure based on selected census variables, which include income, educational attainment and employment status.



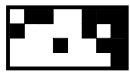

34067

Hospital ID: Site Staff ID: Participant ID: 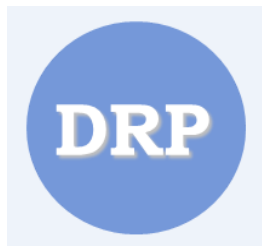

## **DRP: Diabetes Renal Project - (Patient Survey - Health Experiences)**

Thank-you for participating in this large multi-centre research project, called the Diabetes Renal Project (DRP). This National Health and Medical Research Council (NHMRC) partnership project is being conducted by Monash University, in partnership with Monash Health, Alfred Health, Royal North Shore Hospital, Concord Repatriation General Hospital, The George Institute for Global Health, Diabetes Australia, and Kidney Health Australia.

### **INSTRUCTIONS**

#### **PLEASE:**

Use a black **BIRO**, (DO NOT use a pencil or a fountain or felt tip pen)

Please **PRINT** in **CAPITAL** letters and stay within the box provided for text.

If you make a **mistake when writing**, cross it out with one thick line and write your correct answer above the box.

To answer a multiple choice question place a **CROSS INSIDE** the box like this:

If you make a **mistake**, place a diagonal line through the incorrect answer like this:

Write dates using leading zeros (e.g. **6th April 2011 = 06/04/2011**)

**DO NOT USE** liquid paper to correct mistakes.

**AVOID** folding the form.

Please complete every page of the questionnaire. Sometimes questions may seem very similar or repetitious but they are all a little different, so please answer each question.

**THANK YOU**

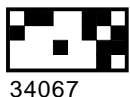

34067

Hospital ID:  Site Staff ID:  Participant ID:

Date  /  /   
day month year

**Part 1: Health Indicators (Patient Survey)**

**Section 1: General Information**

1. Age (years)  2. Country of birth \_\_\_\_\_
3. Main language spoken at home?
- English  Italian  Spanish  Greek
- Arabic  Vietnamese  Cantonese  Hindi
- Mandarin  Other, (please specify) → \_\_\_\_\_

**Section 2: Diabetes**

4. What type of diabetes do you have?  Type 1  Type 2  Unsure  Other
5. How many years have you had diabetes?  years  months
6. How do you manage your diabetes? (select all that apply)
- Diet and lifestyle only  Insulin injections (3 or fewer per day)
- Tablets to lower blood glucose  Insulin injections (4 or more per day)
- Byetta injections (2 per day)  Insulin pump therapy
- Other (please specify) → \_\_\_\_\_
7. If you use insulin how confident are you in self- adjusting your insulin dose? (select one option)
- Not at all confident  1  2  3  4  5 Extremely Confident

**Section 3: Kidney Disease**

8. How many years have you had kidney disease?  years  months
9. Did you develop kidney disease as a result of your diabetes?  No  Yes  Unsure

**Section 4: Medication**

10. Who explains your medications to you? (select all that apply)
- GP  Diabetes nurse
- GP Practice Nurse  Kidney doctor at a public hospital clinic
- Private kidney specialist  Diabetes doctor at a public hospital clinic
- Kidney nurse  Pharmacist
- Private endocrinologist/diabetes specialist
- Other (please specify) → \_\_\_\_\_

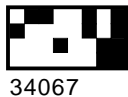

34067

Hospital ID: Site Staff ID: Participant ID: 

### Section 4: Medication (cont)

**11. Which health professional(s) do you see to manage your diabetes and kidney disease? (select all that apply)**

- GP  Kidney doctor at a public hospital clinic  
 GP Practice Nurse  Diabetes doctor at a public hospital clinic  
 Private kidney specialist  Dietitian  
 Kidney nurse  Podiatrist  
 Private endocrinologist/diabetes specialist  Optometrist  
 Diabetes nurse  Ophthalmologist  
 Other (please specify) → \_\_\_\_\_

**12. Please record the last time you saw the following health professionals. (Select the appropriate frequency for each professional)**

|                                      | 0-3<br>months<br>ago     | 4-6<br>months<br>ago     | 7-12<br>months<br>ago    | Over 12<br>months<br>ago | Never                    | Uncertain                |
|--------------------------------------|--------------------------|--------------------------|--------------------------|--------------------------|--------------------------|--------------------------|
| a. Endocrinologist (diabetes doctor) | <input type="checkbox"/> |
| b. Nephrologist (kidney doctor)      | <input type="checkbox"/> |
| c. Diabetes Nurse Educator           | <input type="checkbox"/> |
| d. Kidney Nurse Practitioner         | <input type="checkbox"/> |
| e. Optometrist                       | <input type="checkbox"/> |
| f. Ophthalmologist                   | <input type="checkbox"/> |
| g. Podiatrist                        | <input type="checkbox"/> |
| h. Dentist                           | <input type="checkbox"/> |
| i. Dietitian                         | <input type="checkbox"/> |
| j. Social Worker                     | <input type="checkbox"/> |

**13. If you run out of medication what would you do? (Select all that apply)**

- Obtain a supply from my local pharmacy, even if I didn't have a prescription  
 Obtain a prescription from my GP then have it filled at my local pharmacy  
 Wait until I next saw a doctor to obtain another prescription  
 I never run out because I always ensure I have a spare supply

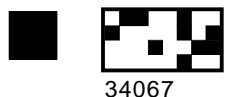

34067

Hospital ID:  Site Staff ID:  Participant ID:

**Section 5. Barriers and support**

**14. Barriers causing difficulty in caring for your diabetes and kidney disease** (Mark disagree or somewhat disagree or somewhat agree or agree to each listed barrier. Please choose only one option per barrier).

|                                                                                                                                                                                | Disagree                 | Somewhat disagree        | Somewhat agree           | Agree                    |
|--------------------------------------------------------------------------------------------------------------------------------------------------------------------------------|--------------------------|--------------------------|--------------------------|--------------------------|
| a. My diabetes and kidney specialist does not spend enough time with me                                                                                                        | <input type="checkbox"/> | <input type="checkbox"/> | <input type="checkbox"/> | <input type="checkbox"/> |
| b. My diabetes and kidney specialist does not provide me with enough information/education about my diabetes and kidney disease                                                | <input type="checkbox"/> | <input type="checkbox"/> | <input type="checkbox"/> | <input type="checkbox"/> |
| c. I am often seen by a different doctor each time I attend my diabetes or kidney disease appointment                                                                          | <input type="checkbox"/> | <input type="checkbox"/> | <input type="checkbox"/> | <input type="checkbox"/> |
| d. My specialists give me conflicting advice                                                                                                                                   | <input type="checkbox"/> | <input type="checkbox"/> | <input type="checkbox"/> | <input type="checkbox"/> |
| e. I do not have a good relationship with my specialist or other specialist health service staff                                                                               | <input type="checkbox"/> | <input type="checkbox"/> | <input type="checkbox"/> | <input type="checkbox"/> |
| f. Specialist health service staff are not caring, polite and helpful                                                                                                          | <input type="checkbox"/> | <input type="checkbox"/> | <input type="checkbox"/> | <input type="checkbox"/> |
| g. My specialists do not communicate well with my GP                                                                                                                           | <input type="checkbox"/> | <input type="checkbox"/> | <input type="checkbox"/> | <input type="checkbox"/> |
| h. My specialists don't communicate well with each other                                                                                                                       | <input type="checkbox"/> | <input type="checkbox"/> | <input type="checkbox"/> | <input type="checkbox"/> |
| i. I do not have a good GP                                                                                                                                                     | <input type="checkbox"/> | <input type="checkbox"/> | <input type="checkbox"/> | <input type="checkbox"/> |
| j. I need more education and understanding of my diabetes                                                                                                                      | <input type="checkbox"/> | <input type="checkbox"/> | <input type="checkbox"/> | <input type="checkbox"/> |
| k. I need more education and understanding of my kidney disease                                                                                                                | <input type="checkbox"/> | <input type="checkbox"/> | <input type="checkbox"/> | <input type="checkbox"/> |
| l. The information provided by my doctors or health professionals is hard to understand because English is not my first language or the information is not culturally relevant | <input type="checkbox"/> | <input type="checkbox"/> | <input type="checkbox"/> | <input type="checkbox"/> |
| m. The information provided by my doctors or health professionals is too complicated                                                                                           | <input type="checkbox"/> | <input type="checkbox"/> | <input type="checkbox"/> | <input type="checkbox"/> |
| n. It is difficult to obtain medical support and advice for my diabetes when I need it                                                                                         | <input type="checkbox"/> | <input type="checkbox"/> | <input type="checkbox"/> | <input type="checkbox"/> |
| o. It is difficult to obtain medical support and advice for my kidney disease when I need it                                                                                   | <input type="checkbox"/> | <input type="checkbox"/> | <input type="checkbox"/> | <input type="checkbox"/> |
| p. I have had an unsatisfactory prior experience with a diabetes or kidney health service/specialist                                                                           | <input type="checkbox"/> | <input type="checkbox"/> | <input type="checkbox"/> | <input type="checkbox"/> |
| q. I am unable to afford the cost of attending appointments or buying medication for my diabetes                                                                               | <input type="checkbox"/> | <input type="checkbox"/> | <input type="checkbox"/> | <input type="checkbox"/> |
| r. I have trouble adjusting to the impact that diabetes and kidney disease has made on my life and/or that of my family and friends                                            | <input type="checkbox"/> | <input type="checkbox"/> | <input type="checkbox"/> | <input type="checkbox"/> |
| s. My diabetes and kidney disease makes me feel very unwell                                                                                                                    | <input type="checkbox"/> | <input type="checkbox"/> | <input type="checkbox"/> | <input type="checkbox"/> |
| t. My other illnesses affect my ability to look after my diabetes and kidney disease                                                                                           | <input type="checkbox"/> | <input type="checkbox"/> | <input type="checkbox"/> | <input type="checkbox"/> |

34067

Hospital ID: Site Staff ID: Participant ID: **Section 5: Barriers and support (cont)**

|                                                                                                                        | Disagree                 | Somewhat disagree        | Somewhat agree           | Agree                    |
|------------------------------------------------------------------------------------------------------------------------|--------------------------|--------------------------|--------------------------|--------------------------|
| u. I have many other stressors in my life, and taking care of my diabetes and kidney disease is not a high priority    | <input type="checkbox"/> | <input type="checkbox"/> | <input type="checkbox"/> | <input type="checkbox"/> |
| v. My job makes it difficult to take care of my diabetes and kidney disease well                                       | <input type="checkbox"/> | <input type="checkbox"/> | <input type="checkbox"/> | <input type="checkbox"/> |
| w. My mood (e.g. feeling down, worried, frustrated) gets in the way of me looking after my diabetes and kidney disease | <input type="checkbox"/> | <input type="checkbox"/> | <input type="checkbox"/> | <input type="checkbox"/> |
| x. I do not feel motivated enough to look after my diabetes and kidney disease well                                    | <input type="checkbox"/> | <input type="checkbox"/> | <input type="checkbox"/> | <input type="checkbox"/> |
| y. I have trouble maintaining the right diet or fluid restriction for my diabetes and kidney disease                   | <input type="checkbox"/> | <input type="checkbox"/> | <input type="checkbox"/> | <input type="checkbox"/> |
| z. I have difficulty knowing what I can eat/drink, for my diabetes and kidney disease                                  | <input type="checkbox"/> | <input type="checkbox"/> | <input type="checkbox"/> | <input type="checkbox"/> |
| aa. I experience unpleasant side-effects from my medication                                                            | <input type="checkbox"/> | <input type="checkbox"/> | <input type="checkbox"/> | <input type="checkbox"/> |
| bb. I do not receive support from my family                                                                            | <input type="checkbox"/> | <input type="checkbox"/> | <input type="checkbox"/> | <input type="checkbox"/> |
| cc. I do not receive support from my friends                                                                           | <input type="checkbox"/> | <input type="checkbox"/> | <input type="checkbox"/> | <input type="checkbox"/> |
| dd. I find it difficult to get services for home-help                                                                  | <input type="checkbox"/> | <input type="checkbox"/> | <input type="checkbox"/> | <input type="checkbox"/> |
| ee. Please list any additional problems:                                                                               | <input type="text"/>     |                          |                          |                          |

**Section 6: Diabetes Service and Kidney Service**

**15. Are you registered with the National Diabetes Service Scheme (NDSS)?** *This service supports people living with diabetes by providing subsidised blood glucose strips and free insulin pen needles/syringes. It is not the same as being a member of Diabetes Australia.*  No  Yes

**16. Do you have difficulty in accessing a diabetes service?**

No → Skip to Q 17

Yes → **16.1. Why is it difficult for you to access a diabetes service?** (select all that apply)

No private transport e.g. car/ driver

Time spent each week at dialysis

Parking (e.g. cost, locality to the clinic)

I have too many appointments

Disability

Long waiting times before I get an appointment

Cost (e.g. appointments, prescription costs)

Long waiting times in the waiting room before I see a doctor

Time of appointment (e.g. during work hours)

I don't have a problem with accessing a service

Location of the service (e.g. distance from home)

Other (please specify) →

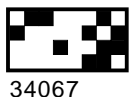Hospital ID: Site Staff ID: Participant ID: 

### Section 6: Diabetes Service and Kidney Service (cont)

17. How satisfied are you with the care provided by your diabetes service? (select one option)

Not at all satisfied  1  2  3  4  5 Extremely Satisfied

18. Do you have difficulty in accessing a kidney service?

No → Skip to Q 19

Yes → 18.1. Why is it difficult for you to access a kidney service? (select all that apply)

No private transport e.g. car/ driver

Time spent each week at dialysis

Parking (e.g. cost, locality to the clinic)

I have too many appointments

Disability

Long waiting times before I get an appointment

Cost (e.g. appointments, prescription costs)

Long waiting times in the waiting room before I see a doctor

Time of appointment (e.g. during work hours)

I don't have a problem with accessing a service

Location of the service (e.g. distance from home)

Other (please specify) →

19. How satisfied are you with the care provided by your kidney service? (select one option)

Not at all satisfied  1  2  3  4  5 Extremely Satisfied

20. An ideal health service to look after my diabetes and kidney disease would include: (please cross either no or yes in the table below)

a. Regular contact with a case manager, nurse or doctor who knows my entire medical history and who will help me coordinate the management of my health  No  Yes

b. Education sessions to help me manage my diabetes, including information about correct food choices and what support is available  No  Yes

c. Education sessions to help me manage my kidney disease, including information about correct food choices and what support is available  No  Yes

d. Education sessions for my family so that they can understand my condition  No  Yes

e. Education sessions targeted to the public/community about diabetes and kidney disease  No  Yes

f. Education handouts that are culturally relevant, in my native language, easy to understand, and in an appropriate format (e.g. DVD)  No  Yes

g. Seeing the same doctor or health professional when I attend my diabetes and kidney disease appointments  No  Yes

h. All my doctors giving me the same information/advice, instead of conflicting information/advice  No  Yes

i. Good communication between my doctors  No  Yes

j. Centralised Electronic health medical records with investigation results, which all my doctors can access  No  Yes

k. Friendly, caring, supportive and knowledgeable staff and medical professionals  No  Yes

34067

Hospital ID: Site Staff ID: Participant ID: **Section 6: Diabetes Service and Kidney Service (cont)**

**l.** A combined multidisciplinary clinic with both diabetes and kidney doctors, as well as other health staff (such as dietitian, nurse educators, podiatrists etc) in the one place  No  Yes

**m.** Shorter waiting times in the waiting room  No  Yes

**n.** Routine access to a psychologist for emotional support  No  Yes

**o.** Routine access to a dietitian  No  Yes

**p.** Routine access to a podiatrist  No  Yes

**q.** Routine access to an eye doctor  No  Yes

**r.** Routine access to a diabetes nurse educator  No  Yes

**s.** Routine access to a kidney nurse  No  Yes

**t.** Routine access to a pharmacist  No  Yes

**u.** Routine access to a social worker  No  Yes

**v.** Routine access to an occupational therapist  No  Yes

**w.** Routine review by doctors and health professionals for my diabetes and kidney disease (e.g. diabetes doctor, dietitian, podiatrist) while I am on dialysis  No  Yes

**x.** Appointment reminders (e.g. phone call/text message/email) prior to my appointment  No  Yes

**y.** Incentives to staff members to provide good patient service (e.g. Monthly prize)  No  Yes

**z.** Debriefing groups and education sessions for staff members to improve patient care  No  Yes

**aa.** Affordable parking close to clinic/dialysis  No  Yes

**bb.** Diabetes and renal services being offered in my local community, rather than primarily based in the hospital  No  Yes

**cc.** 24 hour hotline to staff in case I need advice or assistance  No  Yes

**Section 7: Summary of Diabetes Self Care Activities for Diabetes and Kidney Disease**

Please recall the last 7 days that you were well when answering the following questions. (Please select one response per question).

Diet

**21.** How many of the last 7 days have you followed a healthy eating plan?

0  1  2  3  4  5  6  7

**22.** Over the past month how many days per week have you followed your eating plan?

0  1  2  3  4  5  6  7

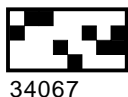Hospital ID: Site Staff ID: Participant ID: 

### Section 7: Summary of Diabetes Self Care Activities for Diabetes and Kidney Disease (cont)

23. On how many of the last 7 days did you eat five or more servings of fruit?

0  1  2  3  4  5  6  7

24. On how many of the last 7 days did you eat high fat foods such as red meat or full dairy products?

0  1  2  3  4  5  6  7

#### Exercise

25. On how many of the last 7 days did you participate in at least 30min of exercise?

0  1  2  3  4  5  6  7

26. On how many of the last 7 days did you participate in a specific exercise session?

0  1  2  3  4  5  6  7

#### Blood Sugar Testing

27. On how many of the last 7 days did you test your blood sugar?

0  1  2  3  4  5  6  7

28. On how many of the last 7 days did you test your blood sugar the number of times recommended by your health care provider?

0  1  2  3  4  5  6  7

#### Foot Care

29. On how many of the last 7 days did you check your feet?

0  1  2  3  4  5  6  7

30. On how many of the last 7 days did you inspect the inside of your shoes?

0  1  2  3  4  5  6  7

#### Smoking

31. Have you smoked or taken a puff of a cigarette in the last 7 days?

No → Skip to Q 32

Yes → 31.1 How many cigarettes did you smoke on an average day?

#### Medications

32. On how many of the last 7 days did you take your recommended diabetes medication?

0  1  2  3  4  5  6  7

33. On how many of the last 7 days did you take your recommended insulin injections?

0  1  2  3  4  5  6  7

34. On how many of the last 7 days did you take your recommended number of diabetes pills?

0  1  2  3  4  5  6  7





27311

Hospital ID: Site Staff ID: Participant ID: 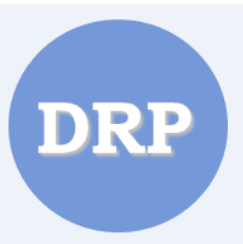

## DRP: Diabetes Renal Project (Doctors Survey - Health Indicators)

Thank-you for participating in this large multi-centre research project, called the Diabetes Renal Project (DRP). This National Health and Medical Research Council (NHMRC) partnership project is being conducted by Monash University, in partnership with Monash Health, Alfred Health, Royal North Shore Hospital, Concord Repatriation General Hospital, The George Institute for Global Health, Diabetes Australia, and Kidney Health Australia.

### INSTRUCTIONS

#### PLEASE:

Use a black **BIRO**, (DO NOT use a pencil or a fountain or felt tip pen)

Please **PRINT** in **CAPITAL** letters and stay within the box provided for text.

If you make a **mistake when writing**, cross it out with one thick line and write your correct answer above the box.

To answer a multiple choice question place a **CROSS INSIDE** the box like this:

If you make a **mistake**, place a diagonal line through the incorrect answer like this:  and then put a cross in the box of your preferred response.

Write dates using leading zeros (e.g. **6th April 2011 = 06/04/2011**)

**DO NOT USE** liquid paper to correct mistakes.

**AVOID** folding the form.

Please complete every page of the questionnaire. Sometimes questions may seem very similar or repetitious but they are all a little different, so please answer each question.

**THANK YOU**



Hospital ID:  Site Staff ID:  Participant ID:

Date  /  /   
day month year

### Health Indicators (Doctors Survey)

#### Section 1: Demographic of Patient Participant

- |                                                                                                                                                                                                                                                                                                                                                                                                                                                                                                                                    |                                                                                                                                                                                                                                                                                                                                                                                                                                                                                                                                                                                                                                                                                   |
|------------------------------------------------------------------------------------------------------------------------------------------------------------------------------------------------------------------------------------------------------------------------------------------------------------------------------------------------------------------------------------------------------------------------------------------------------------------------------------------------------------------------------------|-----------------------------------------------------------------------------------------------------------------------------------------------------------------------------------------------------------------------------------------------------------------------------------------------------------------------------------------------------------------------------------------------------------------------------------------------------------------------------------------------------------------------------------------------------------------------------------------------------------------------------------------------------------------------------------|
| <p><b>1. Age (years)</b> <input type="text"/></p> <p><b>2. Gender</b> <input type="checkbox"/> Male <input type="checkbox"/> Female</p> <p><b>3. Participant Post-code</b> <input type="text"/></p> <p><b>4. Aboriginal background</b> <input type="checkbox"/> No <input type="checkbox"/> Yes</p> <p><b>5. Torres Strait Islander background</b> <input type="checkbox"/> No <input type="checkbox"/> Yes</p> <p><b>6. Maori/Pacific Strait Islander background</b> <input type="checkbox"/> No <input type="checkbox"/> Yes</p> | <p><b>7. Is the participant a current smoker ?</b><br/> <input type="checkbox"/> No → Skip to Q 8<br/> <input type="checkbox"/> Yes → <b>7.1. Average number of cigarettes smoked per day?</b> <input type="text"/></p> <p><b>8. Has the participant previously smoked ?</b><br/> <input type="checkbox"/> No → Skip to Q 9<br/> <input type="checkbox"/> Yes → <b>8.1. Average number of cigarettes smoked per day?</b> <input type="text"/></p> <p><b>9. Does the participant currently drink alcohol?</b><br/> <input type="checkbox"/> No → Skip to Q 10<br/> <input type="checkbox"/> Yes → <b>9.1. Average number of standard drinks per week?</b> <input type="text"/></p> |
|------------------------------------------------------------------------------------------------------------------------------------------------------------------------------------------------------------------------------------------------------------------------------------------------------------------------------------------------------------------------------------------------------------------------------------------------------------------------------------------------------------------------------------|-----------------------------------------------------------------------------------------------------------------------------------------------------------------------------------------------------------------------------------------------------------------------------------------------------------------------------------------------------------------------------------------------------------------------------------------------------------------------------------------------------------------------------------------------------------------------------------------------------------------------------------------------------------------------------------|

#### Section 2: Examination Findings

Please complete with the most recent examination findings and date of examination

**10. Blood Pressure - (the average of 3 readings measured after 5 minutes sitting)**

/  mmHg → **10.1**  /  /   
day month year

**11. Heart Rate**  Bpm → **11.1**  /  /   
day month year

**12. Weight**  Kg → **12.1**  /  /   
day month year

**13. Height**  Metres → **13.1**  /  /   
day month year

At the most recent examination, does the participant have the following conditions:

**14a. New loss of vibratory sensation (both feet)**

No  Yes → Date of examination **14a.1**  /  /   
 Not examined/unknown day month year

**14b. New loss of ankle reflexes (both legs)**

No  Yes → Date of examination **14b.1**  /  /   
 Not examined/unknown day month year

**14c. New loss of light touch (eg. loss of pressure sensation with 10gm force monofilament)**

No  Yes → Date of examination **14c.1**  /  /   
 Not examined/unknown day month year





27311

Hospital ID:  Site Staff ID:  Participant ID:

**Section 3: Medical History (cont)**

**31. Prior to their current dialysis, has the patient been on any other form of dialysis?**

No → Skip to Q 32

Yes → **31.1 Haemodialysis?**

No  Yes

Date commenced **31.2**  /  /   
day month year

Date ceased **31.3**  /  /   
day month year

**31.4 Peritoneal dialysis?**

No  Yes

Date commenced **31.5**  /  /   
day month year

Date ceased **31.6**  /  /   
day month year

**32. Has the patient had a kidney transplant?**

No → Skip to Q 33

Yes → **32.1 Date of transplant**  /  /   
day month year

**OR**  Unknown/not documented

**Section 4: Medical Care of Diabetes and Chronic Kidney Disease**

**33. How often does the participant monitor his/her diabetes with a blood glucose monitor? (select one option)**

- ≥ 3 times per day  Once per day (daily)  Once per week (weekly)  Uncertain  
 2 times per day  A few times per week  Rarely  Not documented

**34. Please indicate when the participant was last referred/seen by the following health professionals. (Select the appropriate response for each health professional).**

|                             | Not referred/reviewed by this health professional | 3 months or less         | 4-12 months ago          | 13-24 months ago         | As required              | Uncertain                |
|-----------------------------|---------------------------------------------------|--------------------------|--------------------------|--------------------------|--------------------------|--------------------------|
| a. Endocrinologist          | <input type="checkbox"/>                          | <input type="checkbox"/> | <input type="checkbox"/> | <input type="checkbox"/> | <input type="checkbox"/> | <input type="checkbox"/> |
| b. Nephrologist             | <input type="checkbox"/>                          | <input type="checkbox"/> | <input type="checkbox"/> | <input type="checkbox"/> | <input type="checkbox"/> | <input type="checkbox"/> |
| c. Diabetes Nurse Educator  | <input type="checkbox"/>                          | <input type="checkbox"/> | <input type="checkbox"/> | <input type="checkbox"/> | <input type="checkbox"/> | <input type="checkbox"/> |
| d. Renal Nurse Practitioner | <input type="checkbox"/>                          | <input type="checkbox"/> | <input type="checkbox"/> | <input type="checkbox"/> | <input type="checkbox"/> | <input type="checkbox"/> |
| e. Optometrist              | <input type="checkbox"/>                          | <input type="checkbox"/> | <input type="checkbox"/> | <input type="checkbox"/> | <input type="checkbox"/> | <input type="checkbox"/> |
| f. Ophthalmologist          | <input type="checkbox"/>                          | <input type="checkbox"/> | <input type="checkbox"/> | <input type="checkbox"/> | <input type="checkbox"/> | <input type="checkbox"/> |
| g. Podiatrist               | <input type="checkbox"/>                          | <input type="checkbox"/> | <input type="checkbox"/> | <input type="checkbox"/> | <input type="checkbox"/> | <input type="checkbox"/> |
| h. Dentist                  | <input type="checkbox"/>                          | <input type="checkbox"/> | <input type="checkbox"/> | <input type="checkbox"/> | <input type="checkbox"/> | <input type="checkbox"/> |
| i. Dietician                | <input type="checkbox"/>                          | <input type="checkbox"/> | <input type="checkbox"/> | <input type="checkbox"/> | <input type="checkbox"/> | <input type="checkbox"/> |
| j. Social Worker            | <input type="checkbox"/>                          | <input type="checkbox"/> | <input type="checkbox"/> | <input type="checkbox"/> | <input type="checkbox"/> | <input type="checkbox"/> |

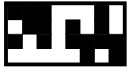

27311

Hospital ID: Site Staff ID: Participant ID: 

### Section 5: Medications

#### 35. Is the participant on Insulin?

No → Skip to Q 36

Yes → 35.1 Is the participant on an Insulin pump?  No  Yes

35.2 What type of insulin? (select all that apply)

Long acting  Short acting  Rapid acting  Basal

#### 36. Is the participant on diabetes tablets?

No → Skip to Q 34

Yes → Does the participant take:

36.1 Metformin?  No  Yes

36.2 Sulphonylurea?  No  Yes

36.3 Glitazone?  No  Yes

36.4 Acarbose?  No  Yes

36.5 Gliptin (DPP4 inhibitor)?  No  Yes

36.6 GLP1 agonist?  No  Yes  
(e.g exenatide or liraglutide)

36.7 SGLT2 inhibitors?  No  Yes

36.8 Other diabetes medication (please list below)

#### 37. Other medications - is the participant taking:

37.1 ACE inhibitor?  No  Yes

37.2 Angiotensin2 Receptor Blocker?  No  Yes

37.3 Other Antihypertensives?  No  Yes

37.4 Statin?  No  Yes

37.5 Fibrate?  No  Yes

37.6 Erythropoieting Stimulating Agent?  No  Yes

37.7 Phosphate binder?  No  Yes

37.8 Iron Supplementation (IV or Oral)?  No  Yes

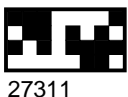

27311

Hospital ID:  Site Staff ID:  Participant ID:

**Section 6: Investigations**

38. Has a HbA1c test been performed in the last 3 months?  No  Yes

Please record the most recent HbA1c result

38.1 HbA1c  mmol/mol **and** 38.2 .% → 38.3 Date of test  /  /   
day month year

39. Please enter details below of the most recent lipid profile results:

39.1 Total Cholesterol . mmol/L

39.2 LDL Cholesterol . mmol/L

39.3 HDL Cholesterol . mmol/L

39.4 Triglycerides . mmol/L

39.5 Date of test  /  /   
day month year

**OR**  Not tested

40. Please enter details below of the most recent serum biochemistry profile results:

40.1 Potassium . mmol/L

40.2 Creatinine  μmol/L

40.3 Calcium . mmol/L

40.4 Phosphate . mmol/L

40.5 Parathyroid hormone (PTH) .  
(result within last 6 months)

40.5.1 Units  pmol/L  ng/L

**OR**  Not done within the past 6 months

40.6 eGFR  mL/min per 1.73m<sup>2</sup>

40.7 Albumin  g/L

40.8 Date of test  /  /   
day month year

(For PTH, please record result from within the past 6 months of this date)

**OR**  Not tested

41. Please record the most recent spot urine albumin / creatinine ratio (ACR):

. mg/mmol 40.1 Date of test  /  /   
day month year **OR**  Not tested

42. If you have used another method to measure microalbumin / proteinuria please record details below:

. 42.1 Units  mg/L  mg/24hr  μg/min  g/mmol  g/L

42.2 Date of test  /  /   
day month year **OR**  Not tested

43. Please enter the most recent Haemoglobin test result:

g/L 43.1 Date of test  /  /   
day month year

**OR**  Not tested

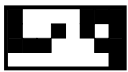

38371

Hospital ID:  Site Staff ID:  Participant ID:

Date  /  /   
day month year

**Patient Activation Measure (PAM) 13™** ©Insignia Health, LLC 2013

*Below are some statements that people sometimes make when they talk about their health. Please indicate how much you agree or disagree with each statement as it applies to you personally by crossing your answer. Your answers should be what is true for you and not just what you think others want you to say. If the statement does not apply to you, cross N/A. (Please choose only one response for each statement).*

|                                                                                                                            | Disagree Strongly        | Disagree                 | Agree                    | Agree Strongly           | N/A                      |
|----------------------------------------------------------------------------------------------------------------------------|--------------------------|--------------------------|--------------------------|--------------------------|--------------------------|
| 1. When all is said and done, I am the person who is responsible for taking care of my health                              | <input type="checkbox"/> |
| 2. Taking an active role in my own health care is the most important thing that affects my health                          | <input type="checkbox"/> |
| 3. I am confident that I can help prevent or reduce problems associated with my health                                     | <input type="checkbox"/> |
| 4. I know what each of my prescribed medications do                                                                        | <input type="checkbox"/> |
| 5. I am confident that I can tell whether I need to go to the doctor or whether I can take care of a health problem myself | <input type="checkbox"/> |
| 6. I am confident that I can tell a doctor concerns I have even when he or she does not ask                                | <input type="checkbox"/> |
| 7. I am confident that I can follow through on medical treatments I may need to do at home                                 | <input type="checkbox"/> |
| 8. I understand my health problems and what causes them                                                                    | <input type="checkbox"/> |
| 9. I know what treatments are available for my health problems                                                             | <input type="checkbox"/> |
| 10. I have been able to maintain (keep up with) lifestyle changes, like eating right or exercising                         | <input type="checkbox"/> |
| 11. I know how to prevent problems with my health                                                                          | <input type="checkbox"/> |
| 12. I am confident I can figure out solutions when new problems arise with my health                                       | <input type="checkbox"/> |
| 13. I am confident that I can maintain lifestyle changes, like eating right and exercising, even during times of stress    | <input type="checkbox"/> |

1  
2  
3  
4  
5  
6  
7  
8  
9  
10  
11  
12  
13  
14  
15  
16  
17  
18  
19  
20  
21  
22  
23  
24  
25  
26  
27  
28  
29  
30  
31  
32  
33  
34  
35  
36  
37  
38  
39  
40  
41  
42  
43  
44  
45  
46  
47  
48  
49  
50  
51  
52  
53  
54  
55  
56  
57  
58

---

# Your Health

– *and* –

# Well-Being

## Kidney Disease and Quality of Life (KDQOL™-36)

This survey asks for your views about your health. This information will help keep track of how you feel and how well you are able to do your usual activities.

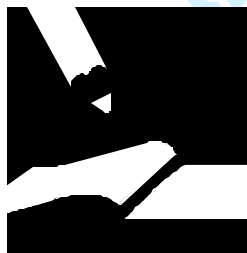

***Thank you for completing these questions!***



# Study of Quality of Life For Patients on Dialysis

---

---

## What is the purpose of the study?

This study is being carried out in cooperation with physicians and their patients. The purpose is to assess the quality of life of patients with kidney disease.

## What will I be asked to do?

For this study, we want you to complete a survey today about your health, how you feel and your background.

## Confidentiality of information?

We do not ask for your name. Your answers will be combined with those of other participants in reporting the findings of the study. Any information that would permit identification of you will be regarded as strictly confidential. In addition, all information collected will be used only for purposes of the study, and will not be disclosed or released for any other purpose without your prior consent.

## How will participation benefit me?

The information you provide will tell us how you feel about your care and further understanding about the effects of medical care on the health of patients. This information will help to evaluate the care delivered.

## Do I have to take part?

You do not have to fill out the survey and you can refuse to answer any question. Your decision to participate will not affect your opportunity to receive care.

# Your Health

This survey includes a wide variety of questions about your health and your life. We are interested in how you feel about each of these issues.

1. In general, would you say your health is: [Mark an  in the one box that best describes your answer.]

|                            |                            |                            |                            |                            |
|----------------------------|----------------------------|----------------------------|----------------------------|----------------------------|
| Excellent                  | Very good                  | Good                       | Fair                       | Poor                       |
| ▼                          | ▼                          | ▼                          | ▼                          | ▼                          |
| <input type="checkbox"/> 1 | <input type="checkbox"/> 2 | <input type="checkbox"/> 3 | <input type="checkbox"/> 4 | <input type="checkbox"/> 5 |

The following items are about activities you might do during a typical day. Does your health now limit you in these activities? If so, how much? [Mark an  in a box on each line.]

|                    |                       |                        |
|--------------------|-----------------------|------------------------|
| Yes, limited a lot | Yes, limited a little | No, not limited at all |
|--------------------|-----------------------|------------------------|

2. Moderate activities, such as moving a table, pushing a vacuum cleaner, bowling, or playing golf .....  1.....  2.....  3

3. Climbing several flights of stairs .....  1.....  2.....  3

**During the past 4 weeks, have you had any of the following problems with your work or other regular daily activities as a result of your physical health?**

|     |    |
|-----|----|
| Yes | No |
| ▼   | ▼  |

4. Accomplished less than you would like.....  1..... 2

5. Were limited in the kind of work or other activities .....  1..... 2

**During the past 4 weeks, have you had any of the following problems with your work or other regular daily activities as a result of any emotional problems (such as feeling depressed or anxious)?**

|     |    |
|-----|----|
| Yes | No |
| ▼   | ▼  |

6. Accomplished less than you would like.....  1..... 2

7. Didn't do work or other activities as carefully as usual .....  1..... 2

**8. During the past 4 weeks, how much did pain interfere with your normal work (including both work outside the home and housework)?**

|                            |                            |                            |                            |                            |
|----------------------------|----------------------------|----------------------------|----------------------------|----------------------------|
| Not at all                 | A little bit               | Moderately                 | Quite a bit                | Extremely                  |
| ▼                          | ▼                          | ▼                          | ▼                          | ▼                          |
| <input type="checkbox"/> 1 | <input type="checkbox"/> 2 | <input type="checkbox"/> 3 | <input type="checkbox"/> 4 | <input type="checkbox"/> 5 |

These questions are about how you feel and how things have been with you during the past 4 weeks. For each question, please give the one answer that comes closest to the way you have been feeling.

How much of the time during the past 4 weeks...

|        |        |        |        |          |        |
|--------|--------|--------|--------|----------|--------|
|        |        |        | A good |          |        |
| All    | Most   | bit    | Some   | A little | None   |
| of the   | of the |
| time   | time   | time   | time   | time     | time   |
| ▼      | ▼      | ▼      | ▼      | ▼        | ▼      |

9. Have you felt calm and peaceful?.....  1.....  2.....  3.....  4.....  5.....  6

10. Did you have a lot of energy? .....  1.....  2.....  3.....  4.....  5.....  6

11. Have you felt downhearted and blue? .  1.....  2.....  3.....  4.....  5.....  6

12. During the past 4 weeks, how much of the time has your physical health or emotional problems interfered with your social activities (like visiting with friends, relatives, etc.)?

|                            |                            |                            |                            |                            |
|----------------------------|----------------------------|----------------------------|----------------------------|----------------------------|
| All                        | Most                       | Some                       | A little                   | None                       |
| of the                     |
| time                       | time                       | time                       | time                       | time                       |
| ▼                          | ▼                          | ▼                          | ▼                          | ▼                          |
| <input type="checkbox"/> 1 | <input type="checkbox"/> 2 | <input type="checkbox"/> 3 | <input type="checkbox"/> 4 | <input type="checkbox"/> 5 |

# Your Kidney Disease

How true or false is each of the following statements for you?

|                 |             |            |              |                  |
|-----------------|-------------|------------|--------------|------------------|
| Definitely true | Mostly true | Don't know | Mostly false | Definitely false |
| ▼               | ▼           | ▼          | ▼            | ▼                |

13. My kidney disease interferes too much with my life .....

1 .....  2 .....  3 .....  4 .....  5

14. Too much of my time is spent dealing with my kidney disease .....

1 .....  2 .....  3 .....  4 .....  5

15. I feel frustrated dealing with my kidney disease .....

1 .....  2 .....  3 .....  4 .....  5

16. I feel like a burden on my family .....

1 .....  2 .....  3 .....  4 .....  5

**During the past 4 weeks, to what extent were you bothered by each of the following?**

|                        |                      |                        |                       |                       |
|------------------------|----------------------|------------------------|-----------------------|-----------------------|
| Not at all<br>bothered | Somewhat<br>bothered | Moderately<br>bothered | Very much<br>bothered | Extremely<br>bothered |
| ▼                      | ▼                    | ▼                      | ▼                     | ▼                     |

- 17. Soreness in your muscles?.....  1 .....  2 .....  3 .....  4 .....  5
- 18. Chest pain? .....  1 .....  2 .....  3 .....  4 .....  5
- 19. Cramps? .....  1 .....  2 .....  3 .....  4 .....  5
- 20. Itchy skin?.....  1 .....  2 .....  3 .....  4 .....  5
- 21. Dry skin?.....  1 .....  2 .....  3 .....  4 .....  5
- 22. Shortness of breath?.....  1 .....  2 .....  3 .....  4 .....  5
- 23. Faintness or dizziness?.....  1 .....  2 .....  3 .....  4 .....  5
- 24. Lack of appetite?...  1 .....  2 .....  3 .....  4 .....  5
- 25. Washed out or drained?.....  1 .....  2 .....  3 .....  4 .....  5
- 26. Numbness in hands or feet?.....  1 .....  2 .....  3 .....  4 .....  5
- 27. Nausea or upset stomach?.....  1 .....  2 .....  3 .....  4 .....  5
- 28<sup>a</sup>. (Hemodialysis patient only)  
Problems with your access site? ...  1 .....  2 .....  3 .....  4 .....  5
- 28<sup>b</sup>. (Peritoneal dialysis patient only)  
Problems with your catheter site?...  1 .....  2 .....  3 .....  4 .....  5

# Effects of Kidney Disease on Your Daily Life

Some people are bothered by the effects of kidney disease on their daily life, while others are not. How much does kidney disease bother you in each of the following areas?

|                        |                      |                        |                       |                       |
|------------------------|----------------------|------------------------|-----------------------|-----------------------|
| Not at all<br>bothered | Somewhat<br>bothered | Moderately<br>bothered | Very much<br>bothered | Extremely<br>bothered |
|------------------------|----------------------|------------------------|-----------------------|-----------------------|

|   |   |   |   |   |
|---|---|---|---|---|
| ▼ | ▼ | ▼ | ▼ | ▼ |
|---|---|---|---|---|

- 29. Fluid restriction?....  1 .....  2 .....  3 .....  4 .....  5
- 30. Dietary restriction?.  1 .....  2 .....  3 .....  4 .....  5
- 31. Your ability to work around the house? .....  1 .....  2 .....  3 .....  4 .....  5
- 32. Your ability to travel? .....  1 .....  2 .....  3 .....  4 .....  5
- 33. Being dependent on doctors and other medical staff?.....  1 .....  2 .....  3 .....  4 .....  5
- 34. Stress or worries caused by kidney disease? .....  1 .....  2 .....  3 .....  4 .....  5
- 35. Your sex life? .....  1 .....  2 .....  3 .....  4 .....  5
- 36. Your personal appearance? .....  1 .....  2 .....  3 .....  4 .....  5

*Thank you for completing these questions!*

## The Summary of Diabetes Self- Care Activities for Diabetes and Kidney Disease

The questions below ask you about your diabetes and kidney disease self-care activities during the past 7 days. If you were sick during the past 7 days, please think back to the last 7 days that you were not sick.

### Diet

How many of the last SEVEN DAYS have you followed a healthful eating plan?

0 1 2 3 4 5 6 7

On average, **over the past month**, how many DAYS PER WEEK have you followed your eating plan?

0 1 2 3 4 5 6 7

On how many of the last SEVEN DAYS did you eat five or more servings of fruits and vegetables?

0 1 2 3 4 5 6 7

On how many of the last SEVEN DAYS did you eat high fat foods such as red meat or full-fat dairy products?

0 1 2 3 4 5 6 7

### Exercise

On how many of the last SEVEN DAYS did you participate in at least 30 minutes of physical activity? (Total minutes of continuous activity, including walking).

0 1 2 3 4 5 6 7

On how many of the last SEVEN DAYS did you participate in a specific exercise session (such as swimming, walking, biking) other than what you do around the house or as part of your work?

0 1 2 3 4 5 6 7

### Blood Sugar Testing

On how many of the last SEVEN DAYS did you test your blood sugar?

0 1 2 3 4 5 6 7

On how many of the last SEVEN DAYS did you test your blood sugar the number of times recommended by your health care provider?

0 1 2 3 4 5 6 7



1  
2  
3 **Foot Care**  
4

5 On how many of the last SEVEN DAYS did you check your feet?  
6

7 0 1 2 3 4 5 6 7  
8

9  
10 On how many of the last SEVEN DAYS did you inspect the inside of your shoes?  
11

12 0 1 2 3 4 5 6 7  
13

14 **Smoking**  
15

16 Have you smoked a cigarette—even one puff—during the past SEVEN DAYS?  
17

18 0. No  
19

20 1. Yes.  
21

22 If yes, how many cigarettes did you smoke on an average day?  
23

24 Number of cigarettes: .....  
25  
26  
27

28 **Medications**  
29

30  
31 On how many of the last SEVEN DAYS, did you take your recommended diabetes  
32 medication?  
33

34 0 1 2 3 4 5 6 7  
35

36  
37 On how many of the last SEVEN days did you take your recommended insulin injections?  
38

39 0 1 2 3 4 5 6 7  
40

41 On how many of the last SEVEN days did you take your recommended number of diabetes  
42 pills?  
43

44 0 1 2 3 4 5 6 7  
45

46  
47 Toobert et al. The Summary of Diabetes Self-Care Activities Measure. Diabetes Care, 23(7)  
48 July 2000: 943-950.  
49  
50  
51  
52  
53  
54  
55  
56  
57  
58  
59  
60

STROBE Statement—Checklist of items that should be included in reports of *cross-sectional studies*

|                              | Item No | Recommendation                                                                                                                                                                                                                                                                                                                                                                                             |
|------------------------------|---------|------------------------------------------------------------------------------------------------------------------------------------------------------------------------------------------------------------------------------------------------------------------------------------------------------------------------------------------------------------------------------------------------------------|
| <b>Title and abstract</b>    | 1       | (a) Indicate the study's design with a commonly used term in the title or the abstract (Page 2 and page 5)<br>(b) Provide in the abstract an informative and balanced summary of what was done and what was found (Page 2-abstract)                                                                                                                                                                        |
| <b>Introduction</b>          |         |                                                                                                                                                                                                                                                                                                                                                                                                            |
| Background/rationale         | 2       | Explain the scientific background and rationale for the investigation being reported (Page 4 to 5 of the background)                                                                                                                                                                                                                                                                                       |
| Objectives                   | 3       | State specific objectives, including any prespecified hypotheses (Stated on page 5, second paragraph)                                                                                                                                                                                                                                                                                                      |
| <b>Methods</b>               |         |                                                                                                                                                                                                                                                                                                                                                                                                            |
| Study design                 | 4       | Present key elements of study design early in the paper (Page 5, under methods)                                                                                                                                                                                                                                                                                                                            |
| Setting                      | 5       | Describe the setting, locations, and relevant dates, including periods of recruitment, exposure, follow-up, and data collection (Page 5, under methods)                                                                                                                                                                                                                                                    |
| Participants                 | 6       | (a) Give the eligibility criteria, and the sources and methods of selection of participants (Page 5, lines 18-24)                                                                                                                                                                                                                                                                                          |
| Variables                    | 7       | Clearly define all outcomes, exposures, predictors, potential confounders, and effect modifiers. Give diagnostic criteria, if applicable (Page 6 to 7)                                                                                                                                                                                                                                                     |
| Data sources/<br>measurement | 8*      | For each variable of interest, give sources of data and details of methods of assessment (measurement). Describe comparability of assessment methods if there is more than one group (Page 6 and 7; health related quality of life and patient activation)                                                                                                                                                 |
| Bias                         | 9       | Describe any efforts to address potential sources of bias (Page 6 and 7, validated measures were used)                                                                                                                                                                                                                                                                                                     |
| Study size                   | 10      | Explain how the study size was arrived at                                                                                                                                                                                                                                                                                                                                                                  |
| Quantitative variables       | 11      | Explain how quantitative variables were handled in the analyses. If applicable, describe which groupings were chosen and why (Page 7 under data analysis)                                                                                                                                                                                                                                                  |
| Statistical methods          | 12      | (a) Describe all statistical methods, including those used to control for confounding (Page 7 to 8)<br>(b) Describe any methods used to examine subgroups and interactions (Page 8, lines 1 to 4)<br>(c) Explain how missing data were addressed (Page 8, line 13-15)<br>(d) If applicable, describe analytical methods taking account of sampling strategy (N/A)<br>(e) Describe any sensitivity analyses |
| <b>Results</b>               |         |                                                                                                                                                                                                                                                                                                                                                                                                            |
| Participants                 | 13*     | (a) Report numbers of individuals at each stage of study—eg numbers potentially eligible, examined for eligibility, confirmed eligible, included in the study, completing follow-up, and analysed (Page 8, line 13)<br>(b) Give reasons for non-participation at each stage<br>(c) Consider use of a flow diagram                                                                                          |
| Descriptive data             | 14*     | (a) Give characteristics of study participants (eg demographic, clinical, social) and information on exposures and potential confounders (Page 8, line 15 to 22)<br>(b) Indicate number of participants with missing data for each variable of interest (Page 8, line 15 to 16)                                                                                                                            |

|                          |     |                                                                                                                                                                                                                       |
|--------------------------|-----|-----------------------------------------------------------------------------------------------------------------------------------------------------------------------------------------------------------------------|
| Outcome data             | 15* | Report numbers of outcome events or summary measures                                                                                                                                                                  |
| Main results             | 16  | (a) Give unadjusted estimates and, if applicable, confounder-adjusted estimates and their precision (eg, 95% confidence interval). Make clear which confounders were adjusted for and why they were included (Page 9) |
|                          |     | (b) Report category boundaries when continuous variables were categorized                                                                                                                                             |
|                          |     | (c) If relevant, consider translating estimates of relative risk into absolute risk for a meaningful time period N/A                                                                                                  |
| Other analyses           | 17  | Report other analyses done—eg analyses of subgroups and interactions, and sensitivity analyses (Page 9, lines 14 to 22- subgroup analyses by gender)                                                                  |
| <b>Discussion</b>        |     |                                                                                                                                                                                                                       |
| Key results              | 18  | Summarise key results with reference to study objectives (Page 10, lines 1 to 10)                                                                                                                                     |
| Limitations              | 19  | Discuss limitations of the study, taking into account sources of potential bias or imprecision. Discuss both direction and magnitude of any potential bias (Page 12, lines page 12 to 16)                             |
| Interpretation           | 20  | Give a cautious overall interpretation of results considering objectives, limitations, multiplicity of analyses, results from similar studies, and other relevant evidence (page 10 to 11)                            |
| Generalisability         | 21  | Discuss the generalisability (external validity) of the study results (Page 12, lines 9 to 12)                                                                                                                        |
| <b>Other information</b> |     |                                                                                                                                                                                                                       |
| Funding                  | 22  | Give the source of funding and the role of the funders for the present study and, if applicable, for the original study on which the present article is based (Page 19, under funding)                                |

\*Give information separately for exposed and unexposed groups.

**Note:** An Explanation and Elaboration article discusses each checklist item and gives methodological background and published examples of transparent reporting. The STROBE checklist is best used in conjunction with this article (freely available on the Web sites of PLoS Medicine at <http://www.plosmedicine.org/>, Annals of Internal Medicine at <http://www.annals.org/>, and Epidemiology at <http://www.epidem.com/>). Information on the STROBE Initiative is available at [www.strobe-statement.org](http://www.strobe-statement.org).

# BMJ Open

## Factors associated with patient activation in an Australian population with comorbid diabetes and chronic kidney disease: a cross sectional study

|                                 |                                                                                                                                                                                                                                                                                                                                                                                                                                                                                                                                                                                                                                                                                                                                                                                                                                                                                                                                                                                                                                                                                                                                                                                                                                                           |
|---------------------------------|-----------------------------------------------------------------------------------------------------------------------------------------------------------------------------------------------------------------------------------------------------------------------------------------------------------------------------------------------------------------------------------------------------------------------------------------------------------------------------------------------------------------------------------------------------------------------------------------------------------------------------------------------------------------------------------------------------------------------------------------------------------------------------------------------------------------------------------------------------------------------------------------------------------------------------------------------------------------------------------------------------------------------------------------------------------------------------------------------------------------------------------------------------------------------------------------------------------------------------------------------------------|
| Journal:                        | <i>BMJ Open</i>                                                                                                                                                                                                                                                                                                                                                                                                                                                                                                                                                                                                                                                                                                                                                                                                                                                                                                                                                                                                                                                                                                                                                                                                                                           |
| Manuscript ID                   | bmjopen-2017-017695.R2                                                                                                                                                                                                                                                                                                                                                                                                                                                                                                                                                                                                                                                                                                                                                                                                                                                                                                                                                                                                                                                                                                                                                                                                                                    |
| Article Type:                   | Research                                                                                                                                                                                                                                                                                                                                                                                                                                                                                                                                                                                                                                                                                                                                                                                                                                                                                                                                                                                                                                                                                                                                                                                                                                                  |
| Date Submitted by the Author:   | 11-Sep-2017                                                                                                                                                                                                                                                                                                                                                                                                                                                                                                                                                                                                                                                                                                                                                                                                                                                                                                                                                                                                                                                                                                                                                                                                                                               |
| Complete List of Authors:       | Zimbudzi, Edward; Monash University, Monash Centre for Health Research and Implementation-MCHRI, School of Public Health and Preventive Medicine; Monash Health, Department of Nephrology<br>Lo, Clement; Monash University, Monash Centre for Health Research and Implementation-MCHRI, School of Public Health and Preventive Medicine; Monash Health, Diabetes and Vascular Medicine Unit<br>Ranasinha, Sanjeeva; Monash University, Monash Centre for Health Research and Implementation-MCHRI, School of Public Health and Preventive Medicine<br>Fulcher, Gregory; Royal North Shore Hospital, Endocrinology; University of Sydney, Northern Clinical School<br>Jan, Stephen; University of Sydney, The George Institute for Global Health; University of Sydney, Sydney Medical School Westmead<br>Kerr, Peter; Monash Health, Department of Nephrology<br>Polkinghorne, Kevin; Monash Health, Nephrology<br>Russell, Grant; Monash University, School of Primary Health Care<br>Walker, Rowan; Alfred Hospital, Renal Medicine<br>Zoungas, Sophia; Monash University, . Monash Centre for Health Research and Implementation-MCHRI, School of Public Health and Preventive Medicine; University of Sydney, The George Institute for Global Health |
| <b>Primary Subject Heading</b>: | Public health                                                                                                                                                                                                                                                                                                                                                                                                                                                                                                                                                                                                                                                                                                                                                                                                                                                                                                                                                                                                                                                                                                                                                                                                                                             |
| Secondary Subject Heading:      | Patient-centred medicine, Renal medicine, Diabetes and endocrinology                                                                                                                                                                                                                                                                                                                                                                                                                                                                                                                                                                                                                                                                                                                                                                                                                                                                                                                                                                                                                                                                                                                                                                                      |
| Keywords:                       | Patient activation, diabetes, chronic kidney disease, self-care, health related quality of life                                                                                                                                                                                                                                                                                                                                                                                                                                                                                                                                                                                                                                                                                                                                                                                                                                                                                                                                                                                                                                                                                                                                                           |
|                                 |                                                                                                                                                                                                                                                                                                                                                                                                                                                                                                                                                                                                                                                                                                                                                                                                                                                                                                                                                                                                                                                                                                                                                                                                                                                           |

SCHOLARONE™  
Manuscripts

1  
2  
3 **Factors associated with patient activation in an Australian population with comorbid**  
4 **diabetes and chronic kidney disease: a cross sectional study**  
5  
6  
7

8  
9 Edward Zimbudzi<sup>1,2</sup>, Clement Lo<sup>1,3</sup>, Sanjeeva Ranasinha<sup>1</sup>, Gregory Fulcher<sup>4</sup>, Stephen  
10 Jan<sup>5,6</sup>, Peter G Kerr<sup>2</sup>, Kevin R. Polkinghorne<sup>2</sup>, Grant Russell<sup>7</sup>, Rowan G. Walker<sup>8</sup>, and  
11 Sophia Zoungas<sup>1,3,5</sup>  
12  
13

14  
15  
16  
17 1. Monash Centre for Health Research and Implementation-MCHRI, School of Public Health and  
18 Preventive Medicine, Monash University, Melbourne, VIC, Australia

19  
20 2. Department of Nephrology, Monash Health, Melbourne, VIC, Australia

21  
22 3. Diabetes and Vascular Medicine Unit, Monash Health, Melbourne, VIC, Australia

23  
24 4. Department of Diabetes and Endocrinology, Royal North Shore Hospital, St Leonards, New South  
25 Wales, Australia  
26

27  
28 5. The George Institute for Global Health, University of Sydney, Sydney, NSW, Australia

29  
30 6. Sydney Medical School Westmead, University of Sydney, Sydney, NSW, Australia

31  
32 7. School of Primary Health and Allied Health Care, Monash University, Melbourne, VIC, Australia

33  
34 8. Department of Renal Medicine, Alfred Hospital, Melbourne, VIC, Australia  
35  
36  
37  
38  
39  
40  
41

42 **Corresponding Author**

43 Prof Sophia Zoungas

44 Monash Centre for Health Research and Implementation

45 School of Public Health and Preventive Medicine, Monash University

46 43-51 Kanooka Grove, Clayton, VIC 3168, Australia

47 Tel.: +61 3 9594 7500; fax: +61 3 9594 7554

48 E-mail address: sophia.zoungas@monash.edu  
49  
50  
51  
52  
53  
54

55 Abstract word count:278

56 Main text word count: 3255  
57  
58  
59  
60

## Abstract

**Objective** To evaluate the extent of patient activation and factors associated with activation in adults with co-morbid diabetes and chronic kidney disease (CKD).

**Design** A cross sectional study.

**Setting** Renal/diabetes clinics of four tertiary hospitals across the two largest states of Australia.

**Study population** Adult patients (over 18 years) with co-morbid diabetes and CKD (eGFR <60 mL/min/1.73m<sup>2</sup>).

**Main outcome measures** Patients completed the Patient Activation Measure, the Kidney Disease Quality of Life and demographic and clinical data survey from January to December 2014. Factors associated with patient activation were examined using chi-squared or t-tests and linear regression.

**Results** Three hundred and five patients with median age of 68 (interquartile range 14.8) years were studied. They were evenly distributed across socioeconomic groups, stage of kidney disease and duration of diabetes but not gender. Approximately 46% reported low activation. In patients with low activation, the symptom/problem list, burden of kidney disease and mental composite subscales scores were all significantly lower (all  $p < 0.05$ ). On multivariable analysis, factors associated with lower activation for all patients were older age, worse self-reported health in the burden of kidney disease subscale and lower self-care scores. Additionally, in men, worse self-reported health in the mental composite subscale was associated with lower activation and in women, worse self-reported health scores in the symptom problem list and greater renal impairment were associated with lower activation.

**Conclusion** Findings from this study suggest that levels of activation are low in patients with diabetes and CKD. Older age and worse self-reported health were associated with lower activation. This data may serve as the basis for the development of interventions needed to enhance activation and outcomes for patients with diabetes and CKD.

## Key words

Patient activation; diabetes; chronic kidney disease; self-care; health related quality of life

**Strengths and limitations of this study**

- Several biologic and non-biological patient variables were included as potential factors influencing patient activation since the factors are likely to be multifactorial.
- The study was conducted across multiple sites increasing the generalizability of the findings.
- The limitations include that our findings may not be generalised to culturally and linguistically diverse (CALD) populations.
- The cross sectional design of the study did not permit us to assess temporal effects or to rule out the potential for reverse causality with low activation causing poor health.

## INTRODUCTION

Patient activation may be defined as the ability and willingness of patients to take on the role of managing their own health and health care<sup>1</sup> and is related to the degree that a patient participates or engages in specific health behaviours.<sup>2-4</sup> Previous studies of hypertensive patients in primary care settings suggest that patient activation is associated with patient outcomes, where low activated patients are more likely to smoke,<sup>5</sup> have a higher body mass index (BMI) and less likely to achieve cholesterol and glycated haemoglobin (HbA1c) targets.<sup>6</sup> In patients with diabetes, high activation has been associated with greater engagement in exercise,<sup>7</sup> fewer hospitalisations<sup>8</sup> and improved glycemic control.<sup>9</sup> In patients with hypertension<sup>5,10,11</sup> and chronic kidney disease (CKD)<sup>12</sup> high activation is associated with better blood pressure control and in patients with end-stage kidney disease higher activation is likely to improve uptake of home dialysis.<sup>13</sup>

Low activation levels have been reported in 25-40% of the general population<sup>14</sup> and in patients living with chronic diseases.<sup>12,15,16</sup> However, activation levels may vary considerably depending on the severity of the chronic disease.<sup>17,18</sup> Indeed, little is known about the activation levels of patients with multiple and complex chronic diseases, including co-morbid diabetes and CKD. Among patients with diabetes and CKD, a sufficient degree of activation is required for patients to perform self-management behaviors such as blood glucose monitoring and medication self-management.<sup>19</sup> Moreover, as these patients face competing treatment demands especially when treatment recommendations for one condition conflict with or impede management of the other, or when patients prioritize one condition over another,<sup>20-22</sup> understanding the degree of patient activation becomes even more important.



1  
2  
3 Missed opportunities to enhance activation among patients with diabetes and CKD may result  
4  
5 in more rapid progression of CKD and development of associated complications.<sup>23</sup>  
6

7  
8 Additionally, activation levels may fluctuate as the disease progresses and complications  
9  
10 arise necessitating matched changes in activation behaviour.<sup>24</sup>  
11

12  
13 Given the importance of patient activation for self-management in people with diabetes and  
14  
15 CKD and ultimately patient outcomes, it is important to establish the level of activation in  
16  
17 these patients and determine the patient and disease characteristics that influence activation.  
18  
19 Consequently, the purpose of the present study was to 1) examine to what degree patients  
20  
21 with co-morbid diabetes and CKD are activated and 2) identify what modifiable risk factors  
22  
23 are independently associated with activation levels in patients with co-morbid diabetes and  
24  
25 CKD.  
26  
27

## 28 29 **METHODS**

### 30 31 32 **Study design and participants**

33  
34  
35 A cross-sectional study was conducted (as previously described)<sup>25</sup> of patients attending  
36  
37 diabetes and renal outpatient clinics of four public tertiary hospitals in Victoria and New  
38  
39 South Wales (Monash Health, Alfred Health, Royal North Shore Hospital and Concord  
40  
41 Hospital) from January to December 2014. Participants were eligible if they received their  
42  
43 usual care at these hospitals and had a diagnosis of diabetes (either type 1 or type 2) and  
44  
45 chronic kidney disease stages 3 to 5 (eGFR<60 mL/min). The diagnosis of diabetes followed  
46  
47 the World Health Organisation definition<sup>26</sup> and was recorded from patients' prior inpatient  
48  
49 or outpatient contacts. Patients were recruited prospectively from clinics and the following  
50  
51 questionnaires were completed; the Diabetes Renal Project (Patient Survey), Diabetes Renal  
52  
53 Project (Doctors Survey), the Summary of Diabetes Self-Care Activities (SDSCA)  
54  
55 questionnaire, the Kidney Disease Quality of Life short form (KDQoL<sup>TM</sup>-36) and the Patient  
56  
57  
58  
59  
60

1  
2  
3 Activation Measure (PAM-13) (supplementary appendices 1, 2, 3, 4 and 5). The Diabetes  
4  
5 Renal Project (Patient Survey) (see online supplementary appendix 1) collected demographic  
6  
7 information (age, gender, country of birth, language spoken at home) and clinical  
8  
9 characteristics such as duration of diabetes and CKD. For each patient the site study staff or  
10  
11 the clinician, using standardised procedures that included health assessment templates also  
12  
13 completed a corresponding clinical survey, the Diabetes Renal Project (Doctors Survey) (see  
14  
15 online supplementary appendix 2). The questionnaire collected information on patients'  
16  
17 medical history, clinical findings, access to medical care for diabetes and CKD, medications  
18  
19 and investigations such as blood test results. All participants were provided with written  
20  
21 informed consent and 317 agreed to participate. All local hospital and university Human  
22  
23 Research Ethics Committees (Monash Health Human Research Ethics Committee, Alfred  
24  
25 Health Research Ethics Committee, Monash University Human Research Ethics Committee,  
26  
27 Northern Sydney Local Health District Human Research Ethics Committee, Sydney Local  
28  
29 Health District Human Research Ethics Committee and the University of Sydney Human  
30  
31 Research Ethics Committee) approved this study.  
32  
33  
34  
35  
36

### 37 **Demographic and clinical variables**

38  
39 Age, gender, socio-economic status (SES), stage of kidney disease, duration of kidney  
40  
41 disease and duration of diabetes were all recorded as possible determinants of patient  
42  
43 activation. SES was estimated using the Australian Bureau of Statistics data.<sup>27</sup> Postcodes  
44  
45 were coded according to the Index of Relative Social Disadvantage (IRSD), a composite  
46  
47 measure based on selected census variables, which include income, educational attainment  
48  
49 and employment status. The IRSD scores for each postcode were then grouped into quintiles  
50  
51 for analysis, where the highest quintile comprised 20% of postcodes with the highest IRSD  
52  
53 scores (the most advantaged areas).  
54  
55  
56  
57  
58  
59  
60

1  
2  
3 CKD stage as defined by the Kidney Disease: Improving Global Outcomes (KDIGO) was  
4  
5 used to define severity of the disease.<sup>28</sup> Duration of CKD was analysed as a continuous  
6  
7 variable. Estimated GFR was calculated using the CKD EPI formula  $GFR = 141 \times \min$   
8  
9  $(Scr/\kappa, 1)^\alpha \times \max(Scr/\kappa, 1)^{-1.209} \times 0.993^{Age} \times 1.018 \times 1.159$  where Scr is serum creatinine  
10  
11 (mg/dL),  $\kappa$  is 0.7 for females and 0.9 for males,  $\alpha$  is  $-0.329$  for females and  $-0.411$  for males,  
12  
13 min indicates the minimum of Scr/ $\kappa$  or 1, and max indicates the maximum of Scr/ $\kappa$  or 1.<sup>29</sup>  
14  
15 We used the CKD Epi formula because it is routinely reported in Australia<sup>30</sup> as the equation  
16  
17 of choice and is recommended by the Kidney Disease, Improving Global Outcomes (KDIGO)  
18  
19 guidelines<sup>31</sup>.

### 22 23 24 **Self-care**

25  
26 Self-care was assessed by the SDSCA questionnaire<sup>32</sup>, which is a self-report measure of how  
27  
28 often participants performed diabetes self-care activities (see online supplementary appendix  
29  
30 3). The SDSCA measures several dimensions of diabetes self-management with adequate  
31  
32 internal and test-retest reliability, and evidence of validity and sensitivity to change<sup>32</sup>. An  
33  
34 overall Cronbach's  $\alpha$  coefficient of 0.63 has been reported<sup>33</sup>. The SDSCA questionnaire has  
35  
36 been utilised in several studies and settings<sup>34-36</sup> to evaluate self-care among adults with  
37  
38 diabetes. This study used a version of the SDSCA questionnaire that included items assessing  
39  
40 five domains of diabetes self-management which are; general diet (2 items), specific diet (2  
41  
42 items), exercise (2 items), blood glucose testing (2 items), and foot care (2 items)<sup>32</sup>. The  
43  
44 medication self-management domain was excluded because of its ceiling effects and lack of  
45  
46 variability among participants<sup>32</sup>. The smoking self-management domain was also excluded  
47  
48 because smoking behaviour was relevant to smokers only.  
49  
50  
51  
52  
53  
54  
55  
56  
57  
58  
59  
60

### Health Related quality of life

Health related quality of life was assessed using the English version of the Kidney Disease and Quality of Life (KDQoL<sup>TM</sup>-36) questionnaire (see online supplementary appendix 4), which is a 36-item HRQoL survey with five subscales, namely the SF-12 measure of physical and mental functioning, burden of kidney disease, symptom/problems list and the effects of kidney disease subscales.<sup>37</sup> Item scores were summed for each scale and transformed on a scale of 0 to 100 with a higher score indicating better HRQoL.<sup>29</sup> The validity and reliability of the Kidney Disease and Quality of Life (KDQoL<sup>TM</sup>-36) questionnaire has been reported previously.<sup>38, 39, 40</sup>

### Patient activation

A 13-item survey-based scale called the short form of the Patient Activation Measure (PAM-13) that groups patients along a four-point levelling scale based on how activated patients are was used to measure patient activation (see online supplementary appendix 5). It has similar reliability and validity to the 22-item version across different ages, genders and health condition status (Cronbach's alpha of 0.91 and a Rasch person statistic of 0.81 for the real and 0.85 for the model on which it was based).<sup>3, 41</sup> The validity and reliability of the PAM-13 has also been tested in various regions and in patients with different conditions.<sup>42-45</sup> Each item of the form was scored on the 5-point Likert response scale. The raw scores were transformed from the original metric to a 0–100 metric with higher scores indicating higher activation levels. Based on the patient activation score, patients were categorized into four levels: level 1 (score <47.0), level 2 (score 47.1–55.1), level 3 (score 55.2–67.0), and level 4 (score >67.0)<sup>41</sup>. The activation levels were then dichotomized into low activation (Levels 1 and 2) and high activation (Levels 3 and 4) as reported in previous studies.<sup>46, 47</sup>

### Data analysis

Normally distributed data are presented with mean and standard deviation (SD) as the measures of central tendency and dispersion, respectively. Correspondingly, non-normally distributed continuous data are presented with median and interquartile range (IQR, thus 25th and 75th percentiles), respectively. All HRQoL subscales were treated as continuous variables. First, the four patient activation levels were dichotomized into low activation group (Levels 1 and 2) and high activation group (Levels 3 and 4). Second, chi-squared or t-tests (as appropriate) were used to analyse differences or associations between patient and disease characteristics and patient activation. Third, using the PAM score as a continuous variable, univariable regression models were performed in which each covariate was controlled for separately to ascertain its potential importance. Covariates that reached a significance level of  $p < 0.10$  or were of clinical importance were included in stepwise backward multivariable linear regression models that investigated the factors associated with patient activation for the entire study population and stratified analyses according to gender<sup>48</sup>. Potential covariates were age, gender, subscales of HRQoL, eGFR, body mass index, SES and the composite self-care score. Confidence intervals (CIs) were reported at the 95% level and for all analyses, a  $p$  value  $< 0.05$  was considered statistically significant. Cases with missing values were not included in the analyses after checking for the amount of missing data which was minimal (less than 1%) for variables such as age, eGFR, SES and duration of diabetes and kidney disease. There was no pattern in the missing data on any variables. All analyses were performed with IBM SPSS version 22 (Armonk, NY: IBM Corp.) or Stata version 12.1 (Statacorp, College Station, TX).

## RESULTS

### Patient characteristics

A total of 3028 patients were screened, 317 studied and of those 305 included in the analyses after the exclusion of nine patients who had their eGFR misclassified ( $>60\text{ml}/\text{min}/\text{m}^2$ ) and three patients who had incomplete PAM data (Fig 1). There were no differences in age, gender and stage of kidney disease (for one study site) between patients who participated and those who did not participate in the study (see online supplementary table S1). The baseline demographic and clinical characteristics of the study population are shown in table 1. The median age and interquartile range (IQR) was 68 and 14.8 years respectively with 59% of the population being over 68 years old and 30% were women. The patients were evenly distributed across groups defined by SES and stage of kidney disease. Approximately 20% were receiving dialysis treatment.

Patient activation scores were normally distributed across the study population (mean 57.6, SD 15.5); men (mean 57.4, SD 16.0) and women patients (mean 58.1, SD 14.4) (figure 2A and B). Twenty-two percent self-reported PAM level 1, 23.6% level 2, 36.4% level 3 and 18% level 4 (indicating greatest activation) (figure 3). The proportions of the patients with low (levels 1 and 2) and high activation (levels 3 and 4) scores were 46% and 54% respectively (figure 3).

Patients in the low activation group had significantly worse self-reported health in the burden of kidney disease and mental composite summary subscales than patients in the high activation group as shown in table 1 (all  $p<0.05$ ). No other differences between low and high activation groups were found for demographic factors (age, gender and socioeconomic status) and disease factors that included stage and duration of CKD, dialysis status, duration of diabetes and BMI (table 1).

### **Factors associated with patient activation in the study population**

On univariable analysis (table 2), factors associated with lower activation were worse self-reported health in all HRQoL subscales, greater renal impairment (lower eGFR) and lower self-care scores. On multivariable analysis, older age, worse self-reported health in the burden of kidney disease subscale and lower self-care scores were independently associated with lower activation (table 2).

### **Factors associated with patient activation stratified by gender**

Online supplementary tables S2 and S3 show stratified analyses according to gender. On univariable analysis, worse self-reported health in the symptom problems list, burden of kidney disease, mental composite summary subscales and lower self-care scores were associated with lower activation in men. Worse self-reported health in all HRQoL subscales and lower eGFR were associated with lower activation in women. On multivariable analysis, worse self-reported health in the mental composite subscale was independently associated with lower activation in men, and worse self-reported health in the symptom problem list and greater renal impairment (lower eGFR) were independently associated with lower activation in women.

## **DISCUSSION**

Amongst patients with co-morbid diabetes and CKD, we document for the first time in this study that patient activation is low, and identify factors independently associated with lower patient activation. We report significantly worse self-reported health in the burden of kidney disease and mental composite subscales for patients in the low activation group compared to those in the high activation group. Lower activation was also independently associated with older age, having worse self-reported health in the burden of kidney disease subscale and lower self-care scores across the entire study population. In men, worse self-reported health

1  
2  
3 in the mental composite subscale was associated with lower activation. In women worse self-  
4 reported health in the symptom problem list (with symptoms including sore muscles, chest  
5 pain, cramps, itchy or dry skin and shortness of breath, faintness/dizziness, and lack of  
6 appetite) and greater renal impairment were associated with lower patient activation.  
7  
8  
9

10  
11  
12 The mean patient activation score was 57.6 on a theoretical scale of 0–100 and was  
13 comparable to the means cited in several studies across other regions and disease  
14 conditions.<sup>15, 42, 49</sup> Patient activation in patients with co-morbid diabetes and CKD was  
15 generally low with close to 50% of our study population reporting low levels of activation.  
16  
17 This is greater than that of the general population where 25 to 40% have reported low  
18 activation<sup>14</sup> and in patients with diabetes where 20 to 30% reported low activation.<sup>48, 50</sup>  
19  
20 Conversely in patients with CKD alone (eGFR<60 mL/min/1.73m<sup>2</sup>), patient activation has  
21 been observed to be even lower with over 65% of one study cohort<sup>17</sup> reporting low activation  
22 levels. Although we expected that diabetes and CKD in combination would lead to lower  
23 activation compared to either diabetes or CKD alone, our results suggest higher patient  
24 activation among patients with diabetes and CKD. This may be attributed to a focus on self-  
25 management of diabetes. More studies are required to confirm this observation.  
26  
27  
28  
29  
30  
31  
32  
33  
34  
35  
36  
37  
38  
39

40 We found that older age was independently associated with lower activation. Similar findings  
41 have been reported in people with diabetes<sup>8, 16, 27</sup> other chronic diseases<sup>45, 47, 51-53</sup> and in a  
42 national survey of US adults.<sup>54</sup> The reason for this could be a higher prevalence of  
43 depressive symptoms and functional difficulties impairing self-management in older  
44 patients.<sup>51, 52</sup> In contrast, other studies in different populations found conflicting evidence,  
45 showing no direct relationship between patient activation and age.<sup>2, 55-57</sup> These  
46  
47  
48  
49  
50  
51  
52  
53  
54  
55  
56  
57  
58  
59  
60 inconsistencies may be due to differences in clinical and demographic characteristics of the  
populations studied. For example, it has been previously reported that younger patients with



1  
2  
3 CKD have poorer coping strategies compared to older patients<sup>58</sup>, which may lead to low  
4  
5 activation or could possibly be due to low activation. Our results highlight a subgroup at risk  
6  
7 of lower activation, which may benefit from targeted interventions to improve activation.  
8  
9 These interventions may include encouraging patients to ask questions<sup>59</sup> when they attend  
10  
11 medical appointments and training their peers to lead such interventions<sup>60</sup>. Additionally, the  
12  
13 contradictions regarding the relationship between age and patient activation highlight that  
14  
15 intervention strategies cannot exclusively be based on the knowledge of patients'  
16  
17 demographics, but should include other modifiable factors as well.  
18  
19

20  
21  
22 In line with previous studies of patients with conditions other than co-morbid diabetes and  
23  
24 CKD,<sup>15, 51, 54, 61-63</sup> patient activation was low in those with worse self-reported health status.  
25  
26 Our study showed that lower mental health composite scores on KDQoL were independently  
27  
28 associated with lower patient activation, particularly in men. This could be due to men with  
29  
30 co-morbid disease having less ability to cope with multiple conditions than women,<sup>64</sup>  
31  
32 resulting in lower levels of activation. Men with chronic disease may also have less coping  
33  
34 ability because they do not seek help as often as women do.<sup>65</sup> Given the high prevalence of  
35  
36 mental disorders such as depression in patients with CKD,<sup>66</sup> addressing mental health issues  
37  
38 may be very important for enhancing patient activation and outcomes.  
39  
40

41  
42 Our data suggest that greater renal impairment in women may be associated with lower  
43  
44 activation. The most likely explanation for this is that women tend to have lower physical  
45  
46 functioning<sup>67, 68</sup> which is associated with lower patient activation<sup>63</sup> even in the early stages of  
47  
48 CKD.<sup>17, 54</sup> Another plausible explanation is that women may receive less support from their  
49  
50 care givers compared to men due to caregiver stress and fatigue<sup>69</sup> associated with managing  
51  
52 chronic diseases. The lack of support in managing chronic diseases may lead to lower  
53  
54 activation among women. Additionally, due to the complexity of diabetes and CKD, there is  
55  
56  
57  
58  
59  
60

1  
2  
3 limited time to address all patient needs resulting in lower quality medical care for discordant  
4  
5 conditions.<sup>70</sup>  
6  
7

8 Interestingly, we did not find a significant association between SES and patient activation.  
9

10 This is in contrast to other studies that have reported patient activation to vary by SES with  
11  
12 individuals from lower SES groups reported as less activated than those from higher SES  
13  
14 groups.<sup>6, 14</sup> These discordant findings could be attributable to our use of postcode as a  
15  
16 surrogate for SES, which may not accurately represent SES.  
17  
18

### 19 **Strengths and limitations**

20  
21  
22 Our findings should be interpreted in light of the strengths and limitations of our study design.  
23

24 The strengths include the inclusion of several biologic and non-biological patient variables  
25  
26 such as gender, age, SES, HRQoL, BMI and disease duration as potential factors influencing  
27  
28 patient activation since the determinants are likely to be multifactorial. The study was  
29  
30 conducted across multiple sites increasing the generalizability of the findings<sup>71</sup> and we also  
31  
32 used validated and disease-specific instruments for measuring HRQoL (KDQoL<sup>TM</sup>-36) and  
33  
34 patient activation (PAM 13<sup>TM</sup>). The limitations include that our findings may not be  
35  
36 generalised to culturally and linguistically diverse (CALD) populations. The cross sectional  
37  
38 design of the study did not permit assessment of temporal effects or the potential for reverse  
39  
40 causality with low activation causing poor health. Longitudinal studies are needed to better  
41  
42 understand the effects over time of factors influencing patient activation in this population.  
43  
44  
45  
46

### 47 **Conclusions**

48  
49  
50 In conclusion, in patients with co-morbid diabetes and CKD patient activation was low, with  
51  
52 almost half of patients reporting low activation. Older age and worse self-reported health  
53  
54 were associated with lower activation. This data may serve as the basis for the development  
55  
56  
57  
58  
59  
60

1  
2  
3 of interventions needed to enhance activation and outcomes for patients with diabetes and  
4  
5 CKD.  
6  
7  
8  
9  
10

### 11 **Acknowledgements**

12  
13  
14  
15 We acknowledge S Chaviaras, D Giannopoulos, R McGrath and S Coggan for help in study  
16  
17 conduct.  
18

### 19 **Contributors**

20  
21  
22 EZ, CL and SZ conceptualised the study. EZ, CL, SR and SZ performed data curation. EZ  
23  
24 designed the analysis in consultation with CL, SR, GF, SJ, PK, KP, GR, RW, and SZ. EZ  
25  
26 drafted the original draft and all authors reviewed and edited the final manuscript.  
27  
28

### 29 **Conflicts of Interest**

30  
31  
32 The authors declare no conflicts of interest in relation to this work.  
33  
34

### 35 **Ethics approval**

36  
37  
38 Approval for the Diabetes Renal Project (DRP) was obtained from Monash University,  
39  
40 Monash Health, Alfred Health, Royal North Shore Hospital and Concord Hospital.  
41  
42

### 43 **Data sharing statement**

44  
45  
46 Data for the DRP study can be shared for specific research questions that are available from  
47  
48 the corresponding author on request.  
49

### 50 **Funding**

51  
52  
53 This work was supported by a National Health and Medical Research Council, Australia  
54  
55 (NHMRC) Partnership Grant (ID 1055175) between the following health services, research  
56  
57 institutes and national consumer stakeholder groups – Alfred Health; Concord Hospital;  
58  
59  
60

1  
2  
3 Royal North Shore Hospital; Monash Health; Monash Centre for Health Research and  
4  
5 Implementation, Monash University; The George Institute for Global Health, University of  
6  
7 Sydney; Diabetes Australia; and Kidney Health Australia. An Australian Postgraduate Award  
8  
9 Scholarship supported C Lo. H Teede was supported by a NHMRC, Practitioner Fellowship.  
10  
11 S Zoungas was supported by a NHMRC Senior Research Fellowship.  
12  
13  
14  
15  
16  
17  
18  
19  
20  
21  
22  
23  
24  
25  
26  
27  
28  
29  
30  
31  
32  
33  
34  
35  
36  
37  
38  
39  
40  
41  
42  
43  
44  
45  
46  
47  
48  
49  
50  
51  
52  
53  
54  
55  
56  
57  
58  
59  
60

For peer review only

## References

1. Hibbard JH, Greene J, Becker ER, et al. Racial/ethnic disparities and consumer activation in health. *Health affairs (Project Hope)*. 2008;27(5):1442-53.
2. Alegria M, Sribney W, Perez D, Laderman M, Keefe K. The role of patient activation on patient-provider communication and quality of care for US and foreign born Latino patients. *J Gen Intern Med*. 2009;24 Suppl 3:534-41.
3. Hibbard JH, Stockard J, Mahoney ER, Tusler M. Development of the Patient Activation Measure (PAM): conceptualizing and measuring activation in patients and consumers. *Health services research*. 2004;39(4 Pt 1):1005-26.
4. Donald M, Ware RS, Ozolins IZ, Begum N, Crowther R, Bain C. The role of patient activation in frequent attendance at primary care: a population-based study of people with chronic disease. *Patient Educ Couns*. 2011;83(2):217-21.
5. Kim JY, Wineinger NE, Steinhubl SR. The Influence of Wireless Self-Monitoring Program on the Relationship Between Patient Activation and Health Behaviors, Medication Adherence, and Blood Pressure Levels in Hypertensive Patients: A Substudy of a Randomized Controlled Trial. *Journal of medical Internet research*. 2016;18(6):e116.
6. Greene J, Hibbard JH. Why does patient activation matter? An examination of the relationships between patient activation and health-related outcomes. *J Gen Intern Med*. 2012;27(5):520-6.
7. Rask KJ, Ziemer DC, Kohler SA, Hawley JN, Arinde FJ, Barnes CS. Patient activation is associated with healthy behaviors and ease in managing diabetes in an indigent population. *Diabetes Educ*. 2009;35(4):622-30.
8. Begum N, Donald M, Ozolins IZ, Dower J. Hospital admissions, emergency department utilisation and patient activation for self-management among people with diabetes. *Diabetes research and clinical practice*. 2011;93(2):260-7.
9. Remmers C, Hibbard J, Mosen DM, Wagenfield M, Hoyer RE, Jones C. Is patient activation associated with future health outcomes and healthcare utilization among patients with diabetes? *J Ambul Care Manage*. 2009;32(4):320-7.
10. Thiboutot J, Stuckey H, Binette A, et al. A web-based patient activation intervention to improve hypertension care: study design and baseline characteristics in the web hypertension study. *Contemporary clinical trials*. 2010;31(6):634-46.
11. Olomu A, Khan NNS, Todem D, et al. Blood Pressure Control in Hypertensive Patients in Federally Qualified Health Centers: Impact of Shared Decision Making in the Office-GAP Program. *MDM Policy & Practice*. 2016;1(1).
12. Johnson ML, Zimmerman L, Welch JL, Hertzog M, Pozehl B, Plumb T. Patient activation with knowledge, self-management and confidence in chronic kidney disease. *Journal of renal care*. 2016;42(1):15-22.
13. Winterbottom A, Bekker H, Mooney A. Dialysis modality selection: physician guided or patient led? *Clin Kidney J*. 2016;9(6):823-5.
14. Hibbard JH, Cunningham PJ. How engaged are consumers in their health and health care, and why does it matter? *Res Brief*. 2008(8):1-9.
15. Skolasky RL, Green AF, Scharfstein D, Boulton C, Reider L, Wegener ST. Psychometric properties of the patient activation measure among multimorbid older adults. *Health services research*. 2011;46(2):457-78.
16. Hendriks M, Rademakers J. Relationships between patient activation, disease-specific knowledge and health outcomes among people with diabetes; a survey study. *BMC health services research*. 2014;14:393.
17. Bos-Touwen I, Schuurmans M, Monnikhof EM, et al. Patient and disease characteristics associated with activation for self-management in patients with diabetes, chronic obstructive

- 1  
2  
3 pulmonary disease, chronic heart failure and chronic renal disease: a cross-sectional survey study.  
4 PloS one. 2015;10(5):e0126400.
- 5 18. The Canadian Diabetes Association. 2008 clinical practice guidelines for the prevention and  
6 management of diabetes in Canada 2008.
- 7 19. Trisolini M, Roussel A, Zerhusen E, et al. Activating chronic kidney disease patients and  
8 family members through the Internet to promote integration of care. *Int J Integr Care*. 2004;4:e17.
- 9 20. Al Shamsi S, Al Dhanhani A, Sheek-Hussein MM, Bakoush O. Provision of care for chronic  
10 kidney disease by non-nephrologists in a developing nation: a national survey. *BMJ Open*.  
11 2016;6(8):e010832.
- 12 21. Bower P, Harkness E, Macdonald W, Coventry P, Bundy C, Moss-Morris R. Illness  
13 representations in patients with multimorbid long-term conditions: qualitative study. *Psychology &*  
14 *health*. 2012;27(10):1211-26.
- 15 22. Morris RL, Sanders C, Kennedy AP, Rogers A. Shifting priorities in multimorbidity: a  
16 longitudinal qualitative study of patient's prioritization of multiple conditions. *Chronic illness*.  
17 2011;7(2):147-61.
- 18 23. Fishbane S, Hazzan AD, Halinski C, Mathew AT. Challenges and opportunities in late-stage  
19 chronic kidney disease. *Clinical Kidney Journal*. 2015;8(1):54-60.
- 20 24. Holman H, Lorig K. Patients as partners in managing chronic disease. Partnership is a  
21 prerequisite for effective and efficient health care. *BMJ (Clinical research ed)*. 2000;320(7234):526-7.
- 22 25. Lo C, Ilic D, Teede H, et al. The Perspectives of Patients on Health-Care for Co-Morbid  
23 Diabetes and Chronic Kidney Disease: A Qualitative Study. *PloS one*. 2016;11(1):e0146615.
- 24 26. World Health Organization. Definition and diagnosis of diabetes mellitus and intermediate  
25 hyperglycemia: Report of a WHO/IDF Consultation. Geneva; 2006.
- 26 27. Agrawal V, Jaar BG, Frisby XY, et al. Access to health care among adults evaluated for CKD:  
27 findings from the Kidney Early Evaluation Program (KEEP). *American journal of kidney diseases : the*  
28 *official journal of the National Kidney Foundation*. 2012;59(3 Suppl 2):S5-15.
- 29 28. Kidney Disease: Improving Global Outcomes (KDIGO) CKD Work Group. KDIGO 2012 clinical  
30 practice guideline for the evaluation and management of chronic kidney disease. *Kidney*  
31 *International Supplements*. 2012;3(1):1.
- 32 29. Resnick HE, Foster GL, Bardsley J, Ratner RE. Achievement of American Diabetes Association  
33 clinical practice recommendations among U.S. adults with diabetes, 1999-2002: the National Health  
34 and Nutrition Examination Survey. *Diabetes care*. 2006;29(3):531-7.
- 35 30. Johnson DW, Jones GR, Mathew TH, et al. Chronic kidney disease and automatic reporting of  
36 estimated glomerular filtration rate: new developments and revised recommendations. *The Medical*  
37 *journal of Australia*. 2012;197(4):224-5.
- 38 31. Andrassy KM. Comments on 'KDIGO 2012 Clinical Practice Guideline for the Evaluation and  
39 Management of Chronic Kidney Disease'. *Kidney international*. 2013;84(3):622-3.
- 40 32. Toobert DJ, Hampson SE, Glasgow RE. The summary of diabetes self-care activities measure:  
41 results from 7 studies and a revised scale. *Diabetes care*. 2000;23(7):943-50.
- 42 33. Schmitt A, Gahr A, Hermanns N, Kulzer B, Huber J, Haak T. The Diabetes Self-Management  
43 Questionnaire (DSMQ): development and evaluation of an instrument to assess diabetes self-care  
44 activities associated with glycaemic control. *Health and quality of life outcomes*. 2013;11:138.
- 45 34. Freitas S, Freitas da Silva G, Neta D, Vilarouca da Silva A. Analysis of the self-care of diabetics  
46 according to by the Summary of Diabetes Self-Care Activities Questionnaire (SDSCA) *Acta*  
47 *Scientiarum Health Sciences* 2014;36(1):73-81.
- 48 35. Jalaludin M, Fuziah M, Hong J, Mohamad Adam B, Jamaiyah H. Reliability and Validity of the  
49 Revised Summary of Diabetes Self-Care Activities (SDSCA) for Malaysian Children and Adolescents.  
50 *Malaysian Family Physician*. 2012;7(2&3):10-20.
- 51 36. AlJohani KA, Kendall GE, Snider PD. Psychometric Evaluation of the Summary of Diabetes  
52 Self-Care Activities-Arabic (SDSCA-Arabic): Translation and Analysis Process. *J Transcult Nurs*. 2014.
- 53  
54  
55  
56  
57  
58  
59  
60

- 1
- 2
- 3 37. Hareri HA AM. Assessments of Adherence to Hypertension Medications and Associated
- 4 Factors among Patients Attending Tikur Anbessa Specialized Hospital Renal Unit, Addis Ababa,
- 5 Ethiopia 2012. *International Journal of Nursing Science*. 2013;3(1):6.
- 6 38. Chow SKY, Tam BML. Is the kidney disease quality of life-36 (KDQOL-36) a valid instrument
- 7 for Chinese dialysis patients? *BMC nephrology*. 2014;15(1):199.
- 8 39. Ricardo AC, Hacker E, Lora CM, et al. Validation of the Kidney Disease Quality of Life Short
- 9 Form 36 (KDQOL-36) US Spanish and English versions in a cohort of Hispanics with chronic kidney
- 10 disease. *Ethnicity & disease*. 2013;23(2):202-9.
- 11 40. Chao S, Yen M, Lin TC, Sung JM, Wang MC, Hung SY. Psychometric Properties of the Kidney
- 12 Disease Quality of Life-36 Questionnaire (KDQOL-36). *Western journal of nursing research*.
- 13 2016;38(8):1067-82.
- 14 41. Hibbard JH, Mahoney ER, Stockard J, Tusler M. Development and testing of a short form of
- 15 the patient activation measure. *Health services research*. 2005;40(6 Pt 1):1918-30.
- 16 42. Rademakers J, Nijman J, van der Hoek L, Heijmans M, Rijken M. Measuring patient activation
- 17 in The Netherlands: translation and validation of the American short form Patient Activation
- 18 Measure (PAM13). *BMC Public Health*. 2012;12:577.
- 19 43. Zill JM, Dwinger S, Kriston L, Rohenkohl A, Harter M, Dirmaier J. Psychometric evaluation of
- 20 the German version of the Patient Activation Measure (PAM13). *BMC Public Health*. 2013;13:1027.
- 21 44. Prey JE, Qian M, Restaino S, et al. Reliability and validity of the patient activation measure in
- 22 hospitalized patients. *Patient Educ Couns*. 2016;99(12):2026-33.
- 23 45. Graffigna G, Barello S, Bonanomi A, Lozza E, Hibbard J. Measuring patient activation in Italy:
- 24 Translation, adaptation and validation of the Italian version of the patient activation measure 13
- 25 (PAM13-I). *BMC medical informatics and decision making*. 2015;15:109.
- 26 46. Aung E, Donald M, Williams GM, Coll JR, Doi SAR. Joint influence of patient-assessed chronic
- 27 illness care and patient activation on glycaemic control in type 2 diabetes. *International Journal for*
- 28 *Quality in Health Care*. 2015;27(2):117-24.
- 29 47. Ahn YH, Kim BJ, Ham OK, Kim SH. Factors associated with Patient Activation for Self-
- 30 management among Community Residents with Osteoarthritis in Korea. *J Korean Acad Community*
- 31 *Health Nurs*. 2015;26(3):303-11.
- 32 48. Hendriks SH, Hartog LC, Groenier KH, et al. Patient Activation in Type 2 Diabetes: Does It
- 33 Differ between Men and Women? *Journal of diabetes research*. 2016;2016:7386532.
- 34 49. Nijman J, Hendriks M, Brabers A, de Jong J, Rademakers J. Patient activation and health
- 35 literacy as predictors of health information use in a general sample of Dutch health care consumers.
- 36 *Journal of health communication*. 2014;19(8):955-69.
- 37 50. Aung E, Donald M, Coll JR, Williams GM, Doi SA. Association between patient activation and
- 38 patient-assessed quality of care in type 2 diabetes: results of a longitudinal study. *Health*
- 39 *expectations : an international journal of public participation in health care and health policy*.
- 40 2016;19(2):356-66.
- 41 51. Blakemore A, Hann M, Howells K, et al. Patient activation in older people with long-term
- 42 conditions and multimorbidity: correlates and change in a cohort study in the United Kingdom. *BMC*
- 43 *health services research*. 2016;16(1):582.
- 44 52. Gleason KT, Tanner EK, Boyd CM, Saczynski JS, Szanton SL. Factors associated with patient
- 45 activation in an older adult population with functional difficulties. *Patient Educ Couns*.
- 46 2016;99(8):1421-6.
- 47 53. Ryvicker M, Feldman PH, Chiu YL, Gerber LM. The role of patient activation in improving
- 48 blood pressure outcomes in Black patients receiving home care. *Medical care research and review :*
- 49 *MCRR*. 2013;70(6):636-52.
- 50 54. Smith SG, Pandit A, Rush SR, Wolf MS, Simon CJ. The Role of Patient Activation in
- 51 Preferences for Shared Decision Making: Results From a National Survey of U.S. Adults. *Journal of*
- 52 *health communication*. 2016;21(1):67-75.
- 53
- 54
- 55
- 56
- 57
- 58
- 59
- 60

- 1  
2  
3 55. Do V, Young L, Barnason S, Tran H. Relationships between activation level, knowledge, self-  
4 efficacy, and self-management behavior in heart failure patients discharged from rural hospitals.  
5 *F1000Research*. 2015;4:150.  
6 56. Fowles JB, Terry P, Xi M, Hibbard J, Bloom CT, Harvey L. Measuring self-management of  
7 patients' and employees' health: further validation of the Patient Activation Measure (PAM) based  
8 on its relation to employee characteristics. *Patient Educ Couns*. 2009;77(1):116-22.  
9 57. Lubetkin EI, Lu WH, Gold MR. Levels and correlates of patient activation in health center  
10 settings: building strategies for improving health outcomes. *Journal of health care for the poor and*  
11 *underserved*. 2010;21(3):796-808.  
12 58. Abdel-Kader K, Myaskovsky L, Karpov I, et al. Individual quality of life in chronic kidney  
13 disease: influence of age and dialysis modality. *Clinical journal of the American Society of*  
14 *Nephrology : CJASN*. 2009;4(4):711-8.  
15 59. Deen D, Lu WH, Rothstein D, Santana L, Gold MR. Asking questions: the effect of a brief  
16 intervention in community health centers on patient activation. *Patient Educ Couns*. 2011;84(2):257-  
17 60.  
18 60. Druss BG, Zhao L, von Esenwein SA, et al. The Health and Recovery Peer (HARP) Program: a  
19 peer-led intervention to improve medical self-management for persons with serious mental illness.  
20 *Schizophrenia research*. 2010;118(1-3):264-70.  
21 61. Magnezi R, Glasser S, Shalev H, Sheiber A, Reuveni H. Patient activation, depression and  
22 quality of life. *Patient Education and Counseling*. 2014;94(3):432-7.  
23 62. Hadgkiss EJ, Jelinek GA, Taylor KL, et al. Engagement in a program promoting lifestyle  
24 modification is associated with better patient-reported outcomes for people with MS. *Neurological*  
25 *sciences : official journal of the Italian Neurological Society and of the Italian Society of Clinical*  
26 *Neurophysiology*. 2015;36(6):845-52.  
27 63. Mosen DM, Schmittiel J, Hibbard J, Sobel D, Remmers C, Bellows J. Is patient activation  
28 associated with outcomes of care for adults with chronic conditions? *J Ambul Care Manage*.  
29 2007;30(1):21-9.  
30 64. Chamie K, Connor SE, Maliski SL, Fink A, Kwan L, Litwin MS. Prostate cancer survivorship:  
31 lessons from caring for the uninsured. *Urologic oncology*. 2012;30(1):102-8.  
32 65. Cheshire A, Peters D, Ridge D. How do we improve men's mental health via primary care? An  
33 evaluation of the Atlas Men's Well-being Pilot Programme for stressed/distressed men. *BMC Family*  
34 *Practice*. 2016;17(1):13.  
35 66. Hedayati SS, Minhajuddin AT, Toto RD, Morris DW, Rush AJ. Prevalence of major depressive  
36 episode in CKD. *American journal of kidney diseases : the official journal of the National Kidney*  
37 *Foundation*. 2009;54(3):424-32.  
38 67. Mujais SK, Story K, Brouillette J, et al. Health-related quality of life in CKD Patients: correlates  
39 and evolution over time. *Clinical journal of the American Society of Nephrology : CJASN*.  
40 2009;4(8):1293-301.  
41 68. Zimbudzi E, Lo C, Ranasinha S, et al. Predictors of Health-Related Quality of Life in Patients  
42 with Co-Morbid Diabetes and Chronic Kidney Disease. *PloS one*. 2016;11(12):e0168491.  
43 69. Pinquart M, Sorensen S. Correlates of physical health of informal caregivers: a meta-analysis.  
44 *The journals of gerontology Series B, Psychological sciences and social sciences*. 2007;62(2):P126-37.  
45 70. Piette JD, Kerr EA. The impact of comorbid chronic conditions on diabetes care. *Diabetes*  
46 *care*. 2006;29(3):725-31.  
47 71. Gold JL, Dewa CS. Institutional review boards and multisite studies in health services  
48 research: is there a better way? *Health services research*. 2005;40(1):291-307.  
49  
50  
51  
52  
53  
54  
55  
56  
57  
58  
59  
60



**Table 1:** Patient characteristics by activation status (N=305)

|                                               | Patient activation status |                  | <i>p</i> -value <sup>1</sup> |
|-----------------------------------------------|---------------------------|------------------|------------------------------|
|                                               | Low level N (%)           | High level N (%) |                              |
| Age                                           |                           |                  |                              |
| <68 years                                     | 68 (49.3)                 | 88 (53.3)        | 0.48                         |
| ≥68 years                                     | 70 (50.7)                 | 77 (46.7)        |                              |
| Gender                                        |                           |                  |                              |
| Women                                         | 42 (30.4)                 | 51 (30.9)        | 0.93                         |
| Men                                           | 96 (69.6)                 | 114 (69.1)       |                              |
| Socio-economic status <sup>2</sup> , n: (%)   |                           |                  | 0.86                         |
| Upper                                         | 24 (17.4)                 | 34 (20.6)        |                              |
| Upper middle                                  | 32 (23.2)                 | 31 (18.8)        |                              |
| Lower middle                                  | 27 (19.6)                 | 34 (20.6)        |                              |
| Upper lower                                   | 28 (20.3)                 | 31 (18.8)        |                              |
| Lower                                         | 27 (19.6)                 | 35 (21.2)        |                              |
| CKD <sup>3</sup> duration in years: mean (SD) | 8.8 (9.6)                 | 9.2 (11.6)       | 0.74                         |
| Stage of CKD <sup>4</sup>                     |                           |                  | 0.86                         |
| 3a                                            | 30 (21.7)                 | 42 (25.5)        |                              |
| 3b                                            | 35 (25.4)                 | 42 (25.5)        |                              |
| 4                                             | 34 (24.6)                 | 40 (24.2)        |                              |
| 5                                             | 39 (28.3)                 | 41 (24.8)        |                              |
| Diabetes duration in years: mean (SD)         | 17.1 (12.0)               | 18.2 (11.8)      | 0.40                         |
| Body mass index: mean, n: (%)                 |                           |                  |                              |
| Underweight                                   | 1 (1.4)                   | 1 (1.2)          | 0.60                         |
| Health weight                                 | 17 (24.3)                 | 15 (17.4)        |                              |
| Overweight                                    | 21 (30.0)                 | 23 (26.7)        |                              |
| Obese                                         | 47 (67.1)                 | 31 (36.0)        |                              |
| Dialysis status                               |                           |                  |                              |
| Current                                       | 29 (21.0)                 | 30 (18.2)        | 0.54                         |
| Predialysis                                   | 109 (79.0)                | 135 (81.8)       |                              |
| HRQoL <sup>5</sup> : mean (SD)                |                           |                  |                              |
| Symptom/problem list                          | 72.0 (17.6)               | 75.5 (17.4)      | 0.08                         |
| Effect of kidney disease                      | 71.0 (23.5)               | 74.1 (23.6)      | 0.27                         |
| Burden of kidney disease                      | 55.9 (29.5)               | 63.3 (31.9)      | 0.04                         |
| Physical composite summary                    | 34.4 (11.3)               | 36.0 (11.0)      | 0.26                         |
| Mental composite summary                      | 45.5 (10.5)               | 48.3 (11.0)      | 0.03                         |

Data are presented in N (%) unless otherwise indicated. <sup>1</sup> T-test for mean differences and chi-square test for differences in proportions; <sup>2</sup> Socio-economic status was estimated using the Australian Bureau of Statistics data. Postcodes were coded according to the Index of Relative Social Disadvantage, a composite measure based on selected census variables, which include income, educational attainment and employment status, <sup>3</sup> chronic kidney disease, <sup>4</sup> Stage of CKD-Stage 5 CKD included patients on dialysis (n=59) and not on dialysis (n=21) <sup>5</sup> Health related quality of life

**Table 2:** Univariable and multivariable regression model for factors associated with low activation in the study population

| Variables                               | Univariable<br>B (95% CI) | Multivariable<br>B (95% CI) |
|-----------------------------------------|---------------------------|-----------------------------|
| Age                                     | -0.05 (-0.22 to 0.11)     | -0.18 (-0.35 to -0.01)*     |
| <i>Gender</i>                           |                           |                             |
| Men                                     | Ref                       | Ref                         |
| Women                                   | -0.79 (-4.59 to 3.02)     | -                           |
| <i>Health related quality of life</i>   |                           |                             |
| Symptom problem list                    | 0.15 (0.05 to 0.25)**     | -                           |
| Effects of kidney disease               | 0.09 (0.02 to 0.17)*      | -                           |
| Burden of kidney disease                | 0.11 (0.05 to 0.16)***    | 0.11 (0.05 to 0.17)***      |
| Physical composite summary              | 0.17 (0.01 to 0.33)*      | -                           |
| Mental composite summary                | 0.26 (0.09 to 0.42)**     | -                           |
| Duration of diabetes                    | -0.02 (-0.17 to 0.13)     | -                           |
| Duration of kidney disease              | 0.07 (-0.11 to 0.25)      | -                           |
| eGFR <sup>1</sup>                       | 0.11 (0.00 to 0.21)*      | 0.01 (-0.12 to 0.15)        |
| <i>Body mass index</i>                  |                           |                             |
| Healthy weight <sup>2</sup>             | Ref                       | Ref                         |
| Overweight                              | -2.78 (-7.75 to 2.20)     | -                           |
| Obese                                   | 1.98 (-2.03 to 5.99)      | -                           |
| <i>Socioeconomic status<sup>3</sup></i> |                           |                             |
| Lower                                   | Ref                       | Ref                         |
| Lower middle                            | -0.31 (-4.75 to 4.12)     | -                           |
| Upper lower                             | -1.42 (-5.80 to 2.95)     | -                           |
| Upper middle                            | -0.95 (-5.27 to 3.38)     | -                           |
| Upper                                   | 3.17 (-1.28 to 7.62)      | -                           |
| Self-care composite score               | 0.21 (0.06 to 0.37)**     | 0.18 (0.02 to 0.35)*        |

\*p<0.05; \*\*p<0.01, \*\*\*p<0.001; 1-per 1ml/min increase in eGFR; 2-due to small numbers of underweight patients (N=2), the underweight group was combined with the health weight group for this analysis; 3-Socio-economic status was estimated using the Australian Bureau of Statistics data. Postcodes were coded according to the Index of Relative Social Disadvantage (IRSD), a composite measure based on selected census variables, which include income, educational attainment and employment status.

1  
2  
3  
4  
5  
6  
7  
8  
9  
10  
11  
12  
13  
14  
15  
16  
17  
18  
19  
20  
21  
22  
23  
24  
25  
26  
27  
28  
29  
30  
31  
32  
33  
34  
35  
36  
37  
38  
39  
40  
41  
42  
43  
44  
45  
46  
47  
48  
49  
50  
51  
52  
53  
54  
55  
56  
57  
58  
59  
60

For peer review only

**Figure 1:** Patient inclusion flow diagram

1  
2  
3  
4  
5  
6  
7  
8  
9  
10  
11  
12  
13  
14  
15  
16  
17  
18  
19  
20  
21  
22  
23  
24  
25  
26  
27  
28  
29  
30  
31  
32  
33  
34  
35  
36  
37  
38  
39  
40  
41  
42  
43  
44  
45  
46  
47  
48  
49  
50  
51  
52  
53  
54  
55  
56  
57  
58  
59  
60

For peer review only

**Figure 2:** Patient activation. Distribution of patient activation from (A) the study population (mean 57.6, SD 15.5) and (B) men (mean 57.4, SD 16.0) and women patients (mean 58.1, SD 14.4)

1  
2  
3  
4  
5  
6  
7  
8  
9  
10  
11  
12  
13  
14  
15  
16  
17  
18  
19  
20  
21  
22  
23  
24  
25  
26  
27  
28  
29  
30  
31  
32  
33  
34  
35  
36  
37  
38  
39  
40  
41  
42  
43  
44  
45  
46  
47  
48  
49  
50  
51  
52  
53  
54  
55  
56  
57  
58  
59  
60

For peer review only

**Figure 3:** Distribution of participants across the four levels of patient activation. Level 1 (score of 0.0–47.0) indicates that a person may not yet understand that their role as a patient is important. Level 2 (47.1– 55.1) indicates that a person lacks the confidence and knowledge to take action. Level 3 (55.2– 67) indicates that a person is beginning to take action and level 4 (67.1–100) indicates that a person is proactive about health and engages in many recommended health behaviors

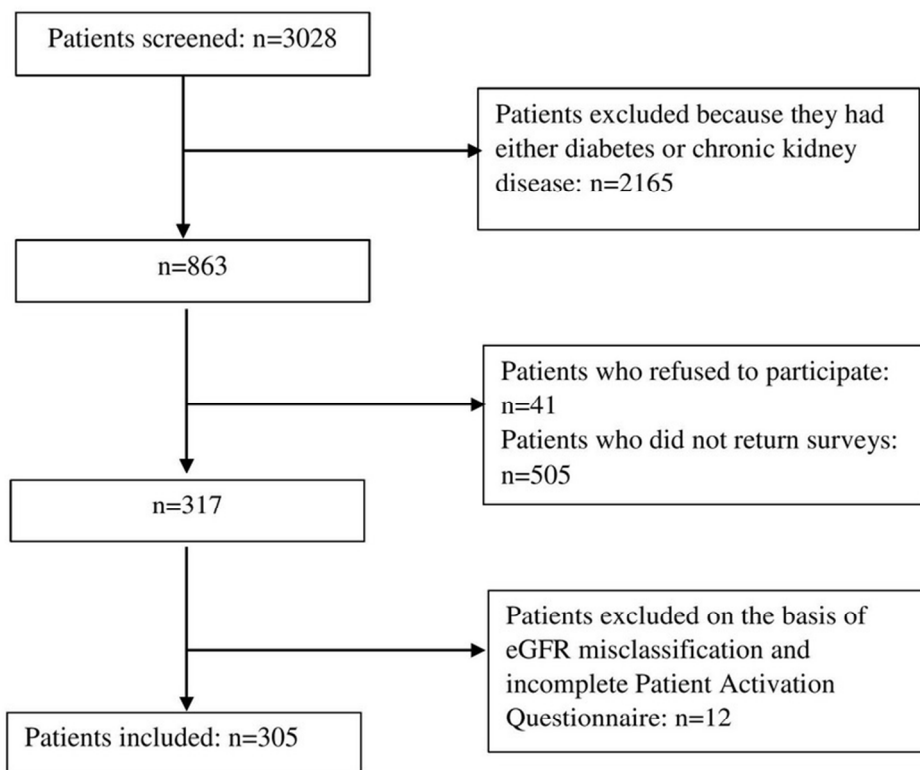

Patient inclusion flow diagram

76x64mm (300 x 300 DPI)

Peer Review Only

1  
2  
3  
4  
5  
6  
7  
8  
9  
10  
11  
12  
13  
14  
15  
16  
17  
18  
19  
20  
21  
22  
23  
24  
25  
26  
27  
28  
29  
30  
31  
32  
33  
34  
35  
36  
37  
38  
39  
40  
41  
42  
43  
44  
45  
46  
47  
48  
49  
50  
51  
52  
53  
54  
55  
56  
57  
58  
59  
60

1  
2  
3  
4  
5  
6  
7  
8  
9  
10  
11  
12  
13  
14  
15  
16  
17  
18  
19  
20  
21  
22  
23  
24  
25  
26  
27  
28  
29  
30  
31  
32  
33  
34  
35  
36  
37  
38  
39  
40  
41  
42  
43  
44  
45  
46  
47  
48  
49  
50  
51  
52  
53  
54  
55  
56  
57  
58  
59  
60

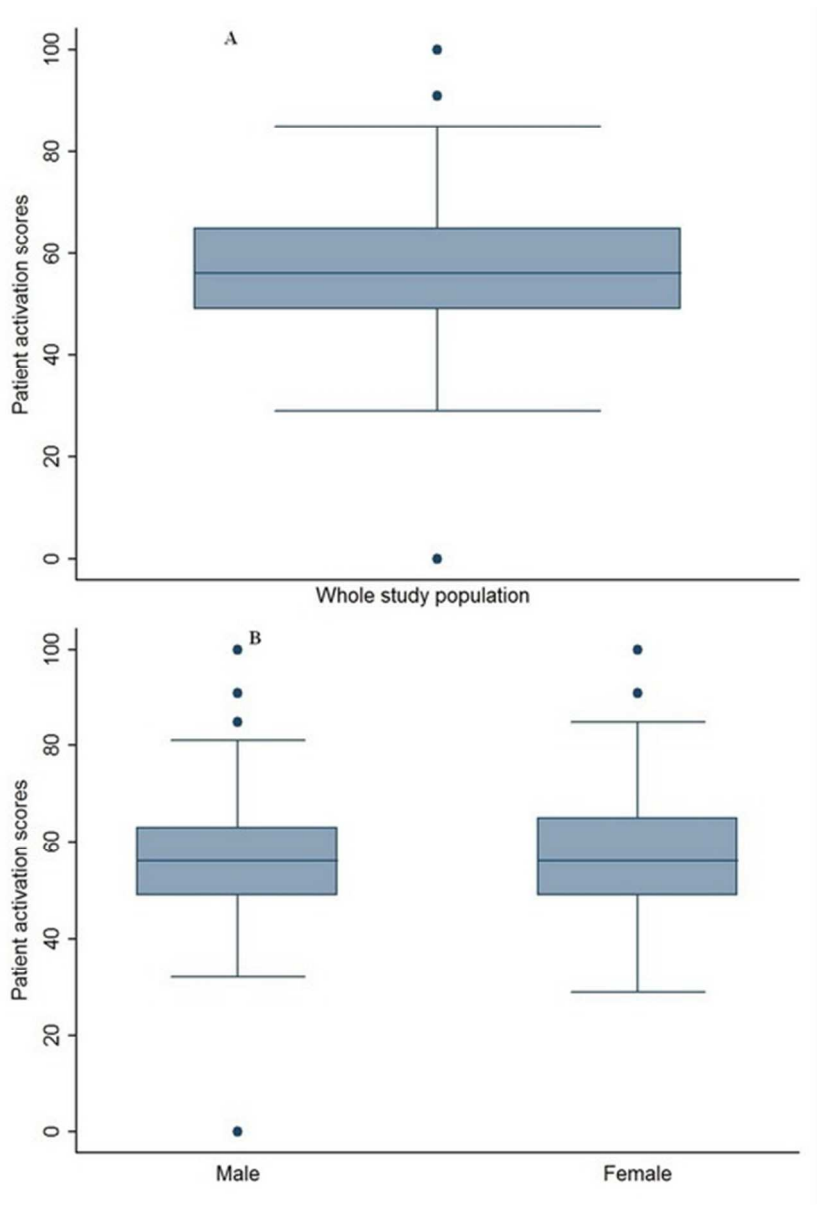

Patient activation. Distribution of patient activation from (A) the study population (mean 57.6, SD 15.5) and (B) men (mean 57.4, SD 16.0) and women patients (mean 58.1, SD 14.4)

43x63mm (300 x 300 DPI)

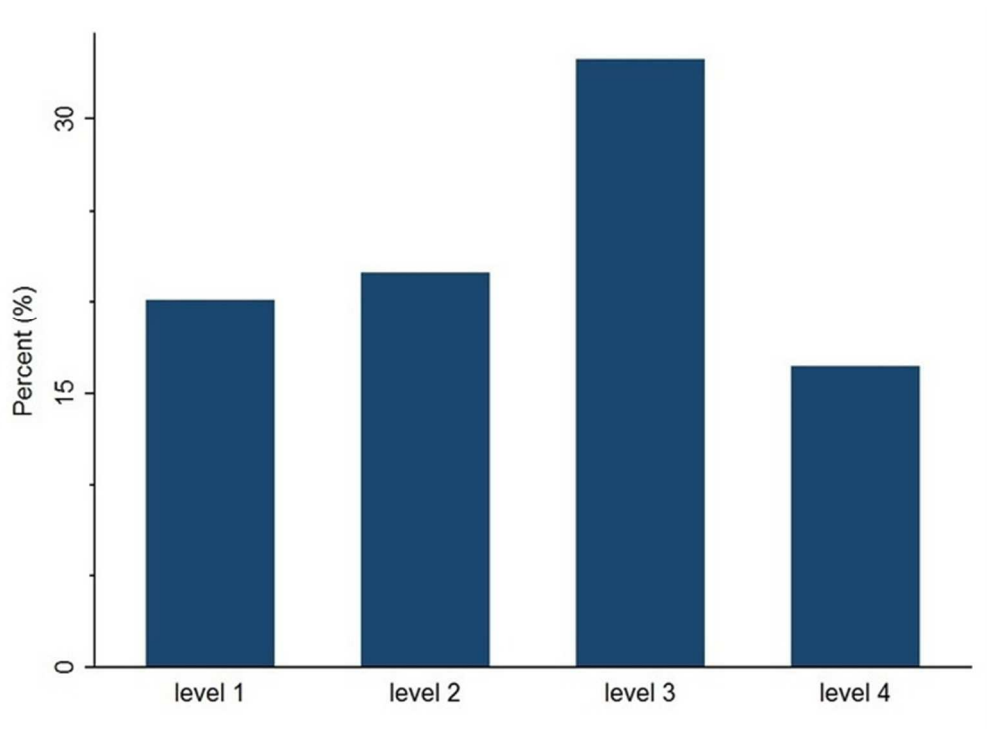

Distribution of participants across the four levels of patient activation. Level 1 (score of 0.0–47.0) indicates that a person may not yet understand that their role as a patient is important. Level 2 (47.1– 55.1) indicates that a person lacks the confidence and knowledge to take action. Level 3 (55.2– 67) indicates that a person is beginning to take action and level 4 (67.1–100) indicates that a person is proactive about health and engages in many recommended health behaviors

57x41mm (300 x 300 DPI)

view only

1  
2  
3  
4  
5  
6  
7  
8  
9  
10  
11  
12  
13  
14  
15  
16  
17  
18  
19  
20  
21  
22  
23  
24  
25  
26  
27  
28  
29  
30  
31  
32  
33  
34  
35  
36  
37  
38  
39  
40  
41  
42  
43  
44  
45  
46  
47  
48  
49  
50  
51  
52  
53  
54  
55  
56  
57  
58  
59  
60



**S1:** Characteristics of patients who did and did not participate in the study at one hospital site

|                     | <b>Responders</b> | <b>Non-responders</b> | <b>p-value</b> |
|---------------------|-------------------|-----------------------|----------------|
| Patient numbers (n) | 127               | 243                   |                |
| Age (SD)            | 66.6 (10.8)       | 68.9 (11.9)           | 0.06           |
| Gender (Female)     | 30.7              | 39.5                  | 0.10           |
| CKD stage (KDOQI %) |                   |                       |                |
| 3                   | 34.2              | 40.9                  |                |
| 4                   | 25.2              | 25.5                  |                |
| 5                   | 33.9              | 40.3                  | 0.37           |

KDOQI-Kidney Disease Outcomes Quality Initiative classification of stages of chronic kidney disease

**S2:** Univariable and multivariable regression model for factors associated with low activation in men with diabetes and chronic kidney disease

| Variables                                | Univariable<br>B (95% CI) | Multivariable<br>B (95% CI) |
|------------------------------------------|---------------------------|-----------------------------|
| Age                                      | -0.11 (-0.32 to 0.12)     | -                           |
| <i>Health related quality of life</i>    |                           |                             |
| Symptom problem list                     | 0.12 (0.04 to 0.25)*      | -                           |
| Effects of kidney disease                | 0.04 (-0.05 to 0.13)      | -                           |
| Burden of kidney disease                 | 0.08 (0.01 to 0.15)*      | -                           |
| Physical composite summary               | 0.06 (-0.15 to 0.26)      | -                           |
| Mental composite summary                 | 0.23 (0.03 to 0.43)*      | 0.23 (0.02 to 0.44)*        |
| Duration of diabetes                     | 0.01 (-0.17 to 0.20)      | -                           |
| Duration of kidney disease               | 0.10 (-0.12 to 0.16)      | -                           |
| eGFR                                     | 0.03 (-0.12 to 0.16)      | -                           |
| <i>Body mass index</i>                   |                           |                             |
| Healthy weight <sup>1</sup>              | Ref                       | Ref                         |
| Overweight                               | -5.08 (-10.96 to 0.80)    | -                           |
| Obese                                    | 2.87 (-2.08 to 7.81)      | -                           |
| <i>Socioeconomic status <sup>2</sup></i> |                           |                             |
| Lower                                    | Ref                       | Ref                         |
| Lower middle                             | 0.41 (-5.04 to 5.85)      | -                           |
| Upper lower                              | -0.63 (-5.98 to 4.73)     | -                           |
| Upper middle                             | -2.23 (-7.37 to 2.92)     | -                           |
| Upper                                    | 4.65 (-1.04 to 10.33)*    | -                           |
| Self-care composite score                | 0.21 (0.01 to 0.40)*      | -                           |

\*p<0.05; \*\*p<0.01, \*\*\*p<0.001; 1-due to small numbers of underweight patients (N=2), the underweight group was combined with the healthy weight group for this analysis; 2-Socio-economic status was estimated using the Australian Bureau of Statistics data. Postcodes were coded according to the Index of Relative Social Disadvantage, a composite measure based on selected census variables, which include income, educational attainment and employment status.

**S3:** Univariable and multivariable regression model for factors associated with low activation in women with diabetes and chronic kidney disease

| Variables                                | Univariable<br>B (95% CI) | Multivariable<br>B (95% CI) |
|------------------------------------------|---------------------------|-----------------------------|
| Age                                      | 0.02 (-0.21 to 0.26)      | -                           |
| <i>Health related quality of life</i>    |                           |                             |
| Symptom problem list                     | 0.21 (0.06 to 0.36)**     | 0.2 (0.05 to 0.35)**        |
| Effects of kidney disease                | 0.21 (0.09 to 0.33)**     | -                           |
| Burden of kidney disease                 | 0.18 (0.09 to 0.27)***    | -                           |
| Physical composite summary               | 0.45 (0.19 to 0.71)**     | -                           |
| Mental composite summary                 | 0.33 (0.05 to 0.60)*      | -                           |
| Duration of diabetes                     | -0.09 (-0.35 to 0.17)     | -                           |
| Duration of kidney disease               | 0.02 (-0.31 to 0.27)      | -                           |
| eGFR                                     | 0.27 (0.10 to 0.43)**     | 0.27 (0.11 to 0.44)**       |
| <i>Body mass index</i>                   |                           |                             |
| Healthy weight <sup>1</sup>              | Ref                       | Ref                         |
| Overweight                               | 4.85 (-4.75 to 14.40)     | -                           |
| Obese                                    | -0.66 (-7.00 to 6.87)     | -                           |
| <i>Socioeconomic status <sup>2</sup></i> |                           |                             |
| Lower                                    | Ref                       | Ref                         |
| Lower middle                             | -1.99 (-9.71 to 5.73)     | -                           |
| Upper lower                              | -3.33 (-11.03 to 4.38)    | -                           |
| Upper middle                             | -3.40 (-4.93 to 11.73)    | -                           |
| Upper                                    | 0.27 (-6.88 to 7.42)      | -                           |
| Self-care composite score                | 0.23 (-0.06 to 0.53)      | -                           |

p<0.05; \*\*p<0.01, \*\*\*p<0.001; 1-due to small numbers of underweight patients (N=2), the underweight group was combined with the healthy weight group for this analysis; 2-Socio-economic status was estimated using the Australian Bureau of Statistics data. Postcodes were coded according to the Index of Relative Social Disadvantage, a composite measure based on selected census variables, which include income, educational attainment and employment status.

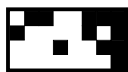

34067

Hospital ID: Site Staff ID: Participant ID: 

## DRP: Diabetes Renal Project - (Patient Survey - Health Experiences)

Thank-you for participating in this large multi-centre research project, called the Diabetes Renal Project (DRP). This National Health and Medical Research Council (NHMRC) partnership project is being conducted by Monash University, in partnership with Monash Health, Alfred Health, Royal North Shore Hospital, Concord Repatriation General Hospital, The George Institute for Global Health, Diabetes Australia, and Kidney Health Australia.

### INSTRUCTIONS

#### PLEASE:

Use a black **BIRO**, (DO NOT use a pencil or a fountain or felt tip pen)

Please **PRINT** in **CAPITAL** letters and stay within the box provided for text.

If you make a **mistake when writing**, cross it out with one thick line and write your correct answer above the box.

To answer a multiple choice question place a **CROSS INSIDE** the box like this:

If you make a **mistake**, place a diagonal line through the incorrect answer like this:

Write dates using leading zeros (e.g. **6th April 2011 = 06/04/2011**)

**DO NOT USE** liquid paper to correct mistakes.

**AVOID** folding the form.

Please complete every page of the questionnaire. Sometimes questions may seem very similar or repetitious but they are all a little different, so please answer each question.

**THANK YOU**

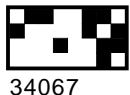

34067

Hospital ID:  Site Staff ID:  Participant ID: Date  /  /   
day month year

## Part 1: Health Indicators (Patient Survey)

## Section 1: General Information

1. Age (years)  2. Country of birth \_\_\_\_\_

## 3. Main language spoken at home?

- English  Italian  Spanish  Greek  
 Arabic  Vietnamese  Cantonese  Hindi  
 Mandarin  Other, (please specify) → \_\_\_\_\_

## Section 2: Diabetes

4. What type of diabetes do you have?  Type 1  Type 2  Unsure  Other5. How many years have you had diabetes?  years  months

## 6. How do you manage your diabetes? (select all that apply)

- Diet and lifestyle only  Insulin injections (3 or fewer per day)  
 Tablets to lower blood glucose  Insulin injections (4 or more per day)  
 Byetta injections (2 per day)  Insulin pump therapy  
 Other (please specify) → \_\_\_\_\_

## 7. If you use insulin how confident are you in self-adjusting your insulin dose? (select one option)

Not at all confident  1  2  3  4  5 Extremely Confident

## Section 3: Kidney Disease

8. How many years have you had kidney disease?  years  months9. Did you develop kidney disease as a result of your diabetes?  No  Yes  Unsure

## Section 4: Medication

## 10. Who explains your medications to you? (select all that apply)

- GP  Diabetes nurse  
 GP Practice Nurse  Kidney doctor at a public hospital clinic  
 Private kidney specialist  Diabetes doctor at a public hospital clinic  
 Kidney nurse  Pharmacist  
 Private endocrinologist/diabetes specialist  
 Other (please specify) → \_\_\_\_\_

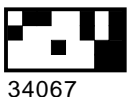

34067

Hospital ID:  Site Staff ID:  Participant ID:

**Section 4: Medication (cont)**

**11. Which health professional(s) do you see to manage your diabetes and kidney disease? (select all that apply)**

- GP  Kidney doctor at a public hospital clinic
- GP Practice Nurse  Diabetes doctor at a public hospital clinic
- Private kidney specialist  Dietitian
- Kidney nurse  Podiatrist
- Private endocrinologist/diabetes specialist  Optometrist
- Diabetes nurse  Ophthalmologist
- Other (please specify) → \_\_\_\_\_

**12. Please record the last time you saw the following health professionals. (Select the appropriate frequency for each professional)**

|                                      | 0-3 months ago           | 4-6 months ago           | 7-12 months ago          | Over 12 months ago       | Never                    | Uncertain                |
|--------------------------------------|--------------------------|--------------------------|--------------------------|--------------------------|--------------------------|--------------------------|
| a. Endocrinologist (diabetes doctor) | <input type="checkbox"/> |
| b. Nephrologist (kidney doctor)      | <input type="checkbox"/> |
| c. Diabetes Nurse Educator           | <input type="checkbox"/> |
| d. Kidney Nurse Practitioner         | <input type="checkbox"/> |
| e. Optometrist                       | <input type="checkbox"/> |
| f. Ophthalmologist                   | <input type="checkbox"/> |
| g. Podiatrist                        | <input type="checkbox"/> |
| h. Dentist                           | <input type="checkbox"/> |
| i. Dietitian                         | <input type="checkbox"/> |
| j. Social Worker                     | <input type="checkbox"/> |

**13. If you run out of medication what would you do? (Select all that apply)**

- Obtain a supply from my local pharmacy, even if I didn't have a prescription
- Obtain a prescription from my GP then have it filled at my local pharmacy
- Wait until I next saw a doctor to obtain another prescription
- I never run out because I always ensure I have a spare supply

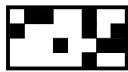

34067

Hospital ID: Site Staff ID: Participant ID: 

### Section 5. Barriers and support

**14. Barriers causing difficulty in caring for your diabetes and kidney disease** (Mark disagree or somewhat disagree or somewhat agree or agree to each listed barrier. Please choose only one option per barrier).

|                                                                                                                                                                                | Disagree                 | Somewhat disagree        | Somewhat agree           | Agree                    |
|--------------------------------------------------------------------------------------------------------------------------------------------------------------------------------|--------------------------|--------------------------|--------------------------|--------------------------|
| a. My diabetes and kidney specialist does not spend enough time with me                                                                                                        | <input type="checkbox"/> | <input type="checkbox"/> | <input type="checkbox"/> | <input type="checkbox"/> |
| b. My diabetes and kidney specialist does not provide me with enough information/education about my diabetes and kidney disease                                                | <input type="checkbox"/> | <input type="checkbox"/> | <input type="checkbox"/> | <input type="checkbox"/> |
| c. I am often seen by a different doctor each time I attend my diabetes or kidney disease appointment                                                                          | <input type="checkbox"/> | <input type="checkbox"/> | <input type="checkbox"/> | <input type="checkbox"/> |
| d. My specialists give me conflicting advice                                                                                                                                   | <input type="checkbox"/> | <input type="checkbox"/> | <input type="checkbox"/> | <input type="checkbox"/> |
| e. I do not have a good relationship with my specialist or other specialist health service staff                                                                               | <input type="checkbox"/> | <input type="checkbox"/> | <input type="checkbox"/> | <input type="checkbox"/> |
| f. Specialist health service staff are not caring, polite and helpful                                                                                                          | <input type="checkbox"/> | <input type="checkbox"/> | <input type="checkbox"/> | <input type="checkbox"/> |
| g. My specialists do not communicate well with my GP                                                                                                                           | <input type="checkbox"/> | <input type="checkbox"/> | <input type="checkbox"/> | <input type="checkbox"/> |
| h. My specialists don't communicate well with each other                                                                                                                       | <input type="checkbox"/> | <input type="checkbox"/> | <input type="checkbox"/> | <input type="checkbox"/> |
| i. I do not have a good GP                                                                                                                                                     | <input type="checkbox"/> | <input type="checkbox"/> | <input type="checkbox"/> | <input type="checkbox"/> |
| j. I need more education and understanding of my diabetes                                                                                                                      | <input type="checkbox"/> | <input type="checkbox"/> | <input type="checkbox"/> | <input type="checkbox"/> |
| k. I need more education and understanding of my kidney disease                                                                                                                | <input type="checkbox"/> | <input type="checkbox"/> | <input type="checkbox"/> | <input type="checkbox"/> |
| l. The information provided by my doctors or health professionals is hard to understand because English is not my first language or the information is not culturally relevant | <input type="checkbox"/> | <input type="checkbox"/> | <input type="checkbox"/> | <input type="checkbox"/> |
| m. The information provided by my doctors or health professionals is too complicated                                                                                           | <input type="checkbox"/> | <input type="checkbox"/> | <input type="checkbox"/> | <input type="checkbox"/> |
| n. It is difficult to obtain medical support and advice for my diabetes when I need it                                                                                         | <input type="checkbox"/> | <input type="checkbox"/> | <input type="checkbox"/> | <input type="checkbox"/> |
| o. It is difficult to obtain medical support and advice for my kidney disease when I need it                                                                                   | <input type="checkbox"/> | <input type="checkbox"/> | <input type="checkbox"/> | <input type="checkbox"/> |
| p. I have had an unsatisfactory prior experience with a diabetes or kidney health service/specialist                                                                           | <input type="checkbox"/> | <input type="checkbox"/> | <input type="checkbox"/> | <input type="checkbox"/> |
| q. I am unable to afford the cost of attending appointments or buying medication for my diabetes                                                                               | <input type="checkbox"/> | <input type="checkbox"/> | <input type="checkbox"/> | <input type="checkbox"/> |
| r. I have trouble adjusting to the impact that diabetes and kidney disease has made on my life and/or that of my family and friends                                            | <input type="checkbox"/> | <input type="checkbox"/> | <input type="checkbox"/> | <input type="checkbox"/> |
| s. My diabetes and kidney disease makes me feel very unwell                                                                                                                    | <input type="checkbox"/> | <input type="checkbox"/> | <input type="checkbox"/> | <input type="checkbox"/> |
| t. My other illnesses affect my ability to look after my diabetes and kidney disease                                                                                           | <input type="checkbox"/> | <input type="checkbox"/> | <input type="checkbox"/> | <input type="checkbox"/> |

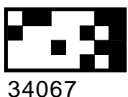

34067

Hospital ID:  Site Staff ID:  Participant ID:

**Section 5: Barriers and support (cont)**

|                                                                                                                        | Disagree                 | Somewhat disagree        | Somewhat agree           | Agree                    |
|------------------------------------------------------------------------------------------------------------------------|--------------------------|--------------------------|--------------------------|--------------------------|
| u. I have many other stressors in my life, and taking care of my diabetes and kidney disease is not a high priority    | <input type="checkbox"/> | <input type="checkbox"/> | <input type="checkbox"/> | <input type="checkbox"/> |
| v. My job makes it difficult to take care of my diabetes and kidney disease well                                       | <input type="checkbox"/> | <input type="checkbox"/> | <input type="checkbox"/> | <input type="checkbox"/> |
| w. My mood (e.g. feeling down, worried, frustrated) gets in the way of me looking after my diabetes and kidney disease | <input type="checkbox"/> | <input type="checkbox"/> | <input type="checkbox"/> | <input type="checkbox"/> |
| x. I do not feel motivated enough to look after my diabetes and kidney disease well                                    | <input type="checkbox"/> | <input type="checkbox"/> | <input type="checkbox"/> | <input type="checkbox"/> |
| y. I have trouble maintaining the right diet or fluid restriction for my diabetes and kidney disease                   | <input type="checkbox"/> | <input type="checkbox"/> | <input type="checkbox"/> | <input type="checkbox"/> |
| z. I have difficulty knowing what I can eat/drink, for my diabetes and kidney disease                                  | <input type="checkbox"/> | <input type="checkbox"/> | <input type="checkbox"/> | <input type="checkbox"/> |
| aa. I experience unpleasant side-effects from my medication                                                            | <input type="checkbox"/> | <input type="checkbox"/> | <input type="checkbox"/> | <input type="checkbox"/> |
| bb. I do not receive support from my family                                                                            | <input type="checkbox"/> | <input type="checkbox"/> | <input type="checkbox"/> | <input type="checkbox"/> |
| cc. I do not receive support from my friends                                                                           | <input type="checkbox"/> | <input type="checkbox"/> | <input type="checkbox"/> | <input type="checkbox"/> |
| dd. I find it difficult to get services for home-help                                                                  | <input type="checkbox"/> | <input type="checkbox"/> | <input type="checkbox"/> | <input type="checkbox"/> |
| ee. Please list any additional problems:                                                                               | <input type="text"/>     |                          |                          |                          |

**Section 6: Diabetes Service and Kidney Service**

**15. Are you registered with the National Diabetes Service Scheme (NDSS)?** *This service supports people living with diabetes by providing subsidised blood glucose strips and free insulin pen needles/syringes. It is not the same as being a member of Diabetes Australia.*  No  Yes

**16. Do you have difficulty in accessing a diabetes service?**

No → Skip to Q 17

Yes → **16.1. Why is it difficult for you to access a diabetes service?** (select all that apply)

- No private transport e.g. car/ driver
- Time spent each week at dialysis
- Parking (e.g. cost, locality to the clinic)
- I have too many appointments
- Disability
- Long waiting times before I get an appointment
- Cost (e.g. appointments, prescription costs)
- Long waiting times in the waiting room before I see a doctor
- Time of appointment (e.g. during work hours)
- I don't have a problem with accessing a service
- Location of the service (e.g. distance from home)
- Other (please specify) → \_\_\_\_\_



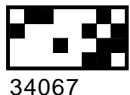Hospital ID: Site Staff ID: Participant ID: 

### Section 6: Diabetes Service and Kidney Service (cont)

17. How satisfied are you with the care provided by your diabetes service? (select one option)

Not at all satisfied  1  2  3  4  5 Extremely Satisfied

18. Do you have difficulty in accessing a kidney service?

No → Skip to Q 19

Yes → 18.1. Why is it difficult for you to access a kidney service? (select all that apply)

No private transport e.g. car/ driver

Time spent each week at dialysis

Parking (e.g. cost, locality to the clinic)

I have too many appointments

Disability

Long waiting times before I get an appointment

Cost (e.g. appointments, prescription costs)

Long waiting times in the waiting room before I see a doctor

Time of appointment (e.g. during work hours)

I don't have a problem with accessing a service

Location of the service (e.g. distance from home)

Other (please specify) →

19. How satisfied are you with the care provided by your kidney service? (select one option)

Not at all satisfied  1  2  3  4  5 Extremely Satisfied

20. An ideal health service to look after my diabetes and kidney disease would include: (please cross either no or yes in the table below)

a. Regular contact with a case manager, nurse or doctor who knows my entire medical history and who will help me coordinate the management of my health  No  Yes

b. Education sessions to help me manage my diabetes, including information about correct food choices and what support is available  No  Yes

c. Education sessions to help me manage my kidney disease, including information about correct food choices and what support is available  No  Yes

d. Education sessions for my family so that they can understand my condition  No  Yes

e. Education sessions targeted to the public/community about diabetes and kidney disease  No  Yes

f. Education handouts that are culturally relevant, in my native language, easy to understand, and in an appropriate format (e.g. DVD)  No  Yes

g. Seeing the same doctor or health professional when I attend my diabetes and kidney disease appointments  No  Yes

h. All my doctors giving me the same information/advice, instead of conflicting information/advice  No  Yes

i. Good communication between my doctors  No  Yes

j. Centralised Electronic health medical records with investigation results, which all my doctors can access  No  Yes

k. Friendly, caring, supportive and knowledgeable staff and medical professionals  No  Yes

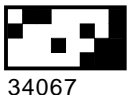

34067

Hospital ID:  Site Staff ID:  Participant ID:

**Section 6: Diabetes Service and Kidney Service (cont)**

- l.** A combined multidisciplinary clinic with both diabetes and kidney doctors, as well as other health staff (such as dietitian, nurse educators, podiatrists etc) in the one place  No  Yes
- m.** Shorter waiting times in the waiting room  No  Yes
- n.** Routine access to a psychologist for emotional support  No  Yes
- o.** Routine access to a dietitian  No  Yes
- p.** Routine access to a podiatrist  No  Yes
- q.** Routine access to an eye doctor  No  Yes
- r.** Routine access to a diabetes nurse educator  No  Yes
- s.** Routine access to a kidney nurse  No  Yes
- t.** Routine access to a pharmacist  No  Yes
- u.** Routine access to a social worker  No  Yes
- v.** Routine access to an occupational therapist  No  Yes
- w.** Routine review by doctors and health professionals for my diabetes and kidney disease (e.g. diabetes doctor, dietitian, podiatrist) while I am on dialysis  No  Yes
- x.** Appointment reminders (e.g. phone call/text message/email) prior to my appointment  No  Yes
- y.** Incentives to staff members to provide good patient service (e.g. Monthly prize)  No  Yes
- z.** Debriefing groups and education sessions for staff members to improve patient care  No  Yes
- aa.** Affordable parking close to clinic/dialysis  No  Yes
- bb.** Diabetes and renal services being offered in my local community, rather than primarily based in the hospital  No  Yes
- cc.** 24 hour hotline to staff in case I need advice or assistance  No  Yes

**Section 7: Summary of Diabetes Self Care Activities for Diabetes and Kidney Disease**

Please recall the last 7 days that you were well when answering the following questions. (Please select one response per question).

Diet

**21. How many of the last 7 days have you followed a healthy eating plan?**

0  1  2  3  4  5  6  7

**22. Over the past month how many days per week have you followed your eating plan?**

0  1  2  3  4  5  6  7

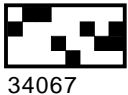

34067

Hospital ID: Site Staff ID: Participant ID: 

### Section 7: Summary of Diabetes Self Care Activities for Diabetes and Kidney Disease (cont)

23. On how many of the last 7 days did you eat five or more servings of fruit?

0  1  2  3  4  5  6  7

24. On how many of the last 7 days did you eat high fat foods such as red meat or full dairy products?

0  1  2  3  4  5  6  7

#### Exercise

25. On how many of the last 7 days did you participate in at least 30min of exercise?

0  1  2  3  4  5  6  7

26. On how many of the last 7 days did you participate in a specific exercise session?

0  1  2  3  4  5  6  7

#### Blood Sugar Testing

27. On how many of the last 7 days did you test your blood sugar?

0  1  2  3  4  5  6  7

28. On how many of the last 7 days did you test your blood sugar the number of times recommended by your health care provider?

0  1  2  3  4  5  6  7

#### Foot Care

29. On how many of the last 7 days did you check your feet?

0  1  2  3  4  5  6  7

30. On how many of the last 7 days did you inspect the inside of your shoes?

0  1  2  3  4  5  6  7

#### Smoking

31. Have you smoked or taken a puff of a cigarette in the last 7 days?

No → Skip to Q 32

Yes → 31.1 How many cigarettes did you smoke on an average day?

#### Medications

32. On how many of the last 7 days did you take your recommended diabetes medication?

0  1  2  3  4  5  6  7

33. On how many of the last 7 days did you take your recommended insulin injections?

0  1  2  3  4  5  6  7

34. On how many of the last 7 days did you take your recommended number of diabetes pills?

0  1  2  3  4  5  6  7

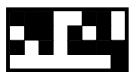

27311

Hospital ID: Site Staff ID: Participant ID: 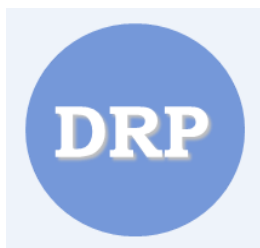

## DRP: Diabetes Renal Project (Doctors Survey - Health Indicators)

Thank-you for participating in this large multi-centre research project, called the Diabetes Renal Project (DRP). This National Health and Medical Research Council (NHMRC) partnership project is being conducted by Monash University, in partnership with Monash Health, Alfred Health, Royal North Shore Hospital, Concord Repatriation General Hospital, The George Institute for Global Health, Diabetes Australia, and Kidney Health Australia.

### INSTRUCTIONS

#### PLEASE:

Use a black **BIRO**, (DO NOT use a pencil or a fountain or felt tip pen)

Please **PRINT** in **CAPITAL** letters and stay within the box provided for text.

If you make a **mistake when writing**, cross it out with one thick line and write your correct answer above the box.

To answer a multiple choice question place a **CROSS INSIDE** the box like this:

If you make a **mistake**, place a diagonal line through the incorrect answer like this:  and then put a cross in the box of your preferred response.

Write dates using leading zeros (e.g. **6th April 2011 = 06/04/2011**)

**DO NOT USE** liquid paper to correct mistakes.

**AVOID** folding the form.

Please complete every page of the questionnaire. Sometimes questions may seem very similar or repetitious but they are all a little different, so please answer each question.

**THANK YOU**

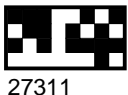

Hospital ID:  Site Staff ID:  Participant ID:

Date  /  /   
day month year

### Health Indicators (Doctors Survey)

#### Section 1: Demographic of Patient Participant

- |                                                                                                                                                                                                                                                                                                                                                                                                                                                                                                                                    |                                                                                                                                                                                                                                                                                                                                                                                                                                                                                                                                                                                                                                                                                   |
|------------------------------------------------------------------------------------------------------------------------------------------------------------------------------------------------------------------------------------------------------------------------------------------------------------------------------------------------------------------------------------------------------------------------------------------------------------------------------------------------------------------------------------|-----------------------------------------------------------------------------------------------------------------------------------------------------------------------------------------------------------------------------------------------------------------------------------------------------------------------------------------------------------------------------------------------------------------------------------------------------------------------------------------------------------------------------------------------------------------------------------------------------------------------------------------------------------------------------------|
| <p><b>1. Age (years)</b> <input type="text"/></p> <p><b>2. Gender</b> <input type="checkbox"/> Male <input type="checkbox"/> Female</p> <p><b>3. Participant Post-code</b> <input type="text"/></p> <p><b>4. Aboriginal background</b> <input type="checkbox"/> No <input type="checkbox"/> Yes</p> <p><b>5. Torres Strait Islander background</b> <input type="checkbox"/> No <input type="checkbox"/> Yes</p> <p><b>6. Maori/Pacific Strait Islander background</b> <input type="checkbox"/> No <input type="checkbox"/> Yes</p> | <p><b>7. Is the participant a current smoker ?</b><br/> <input type="checkbox"/> No → Skip to Q 8<br/> <input type="checkbox"/> Yes → <b>7.1. Average number of cigarettes smoked per day?</b> <input type="text"/></p> <p><b>8. Has the participant previously smoked ?</b><br/> <input type="checkbox"/> No → Skip to Q 9<br/> <input type="checkbox"/> Yes → <b>8.1. Average number of cigarettes smoked per day?</b> <input type="text"/></p> <p><b>9. Does the participant currently drink alcohol?</b><br/> <input type="checkbox"/> No → Skip to Q 10<br/> <input type="checkbox"/> Yes → <b>9.1. Average number of standard drinks per week?</b> <input type="text"/></p> |
|------------------------------------------------------------------------------------------------------------------------------------------------------------------------------------------------------------------------------------------------------------------------------------------------------------------------------------------------------------------------------------------------------------------------------------------------------------------------------------------------------------------------------------|-----------------------------------------------------------------------------------------------------------------------------------------------------------------------------------------------------------------------------------------------------------------------------------------------------------------------------------------------------------------------------------------------------------------------------------------------------------------------------------------------------------------------------------------------------------------------------------------------------------------------------------------------------------------------------------|

#### Section 2: Examination Findings

Please complete with the most recent examination findings and date of examination

- 10. Blood Pressure - (the average of 3 readings measured after 5 minutes sitting)**  
 /  mmHg → **10.1**  /  /   
day month year
- 11. Heart Rate**  Bpm → **11.1**  /  /   
day month year
- 12. Weight**  .  Kg → **12.1**  /  /   
day month year
- 13. Height**  .  Metres → **13.1**  /  /   
day month year

At the most recent examination, does the participant have the following conditions:

- 14a. New loss of vibratory sensation (both feet)**  
 No  Yes → Date of examination **14a.1**  /  /   
 Not examined/unknown day month year
- 14b. New loss of ankle reflexes (both legs)**  
 No  Yes → Date of examination **14b.1**  /  /   
 Not examined/unknown day month year
- 14c. New loss of light touch (eg. loss of pressure sensation with 10gm force monofilament)**  
 No  Yes → Date of examination **14c.1**  /  /   
 Not examined/unknown day month year

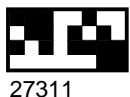

27311

Hospital ID:  Site Staff ID:  Participant ID:

**Section 2: Examination Findings (cont)**

**15. Foot ulcers**

No  Yes → Date of examination **15.1**  /  /   
day month year

Not examined/unknown

**16. Foot deformity**

No  Yes → Date of examination **16.1**  /  /   
day month year

Not examined/unknown

**Section 3: Medical History**

**17. Diabetes Type**  Type 1  Type 2 **18. Duration of diabetes**  years  months

OR  Unknown/not documented

**Has the participant experienced any of the following complications/comorbidities?**

**19. Ischemic Heart Disease?**  No  Yes **23. Peripheral Neuropathy?**  No  Yes

**20. Stroke?**  No  Yes **24. Diabetic Nephropathy?**  No  Yes

**21. Peripheral Vascular disease?**  No  Yes **25. Hypertension**  No  Yes

**22. Diabetic Retinopathy?**  No  Yes **26. Dyslipidemia**  No  Yes

**27. Does the participant have a family history of heart disease?**  No  Yes

OR  Unknown/not documented

**28. Duration of nephrological care**  years  months OR  Unknown/not documented

**29. Kidney disease stage (select one option)**  Stage 3a  Stage 3b  Stage 4  Stage 5

**30. Is the patient currently on dialysis?**

No → Skip to Q 31

Yes → **30.1 Haemodialysis**  No  Yes → **30.2** Number of months on dialysis

**30.3 Peritoneal**  No  Yes → **30.4** Number of months on dialysis

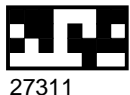
 Hospital ID:  Site Staff ID:  Participant ID: 
**Section 3: Medical History (cont)**
**31. Prior to their current dialysis, has the patient been on any other form of dialysis?**
 No → Skip to Q 32

 Yes → **31.1 Haemodialysis?**
 No  Yes

 Date commenced **31.2**  /  /   
day month year

 Date ceased **31.3**  /  /   
day month year
**31.4 Peritoneal dialysis?**
 No  Yes

 Date commenced **31.5**  /  /   
day month year

 Date ceased **31.6**  /  /   
day month year
**32. Has the patient had a kidney transplant?**
 No → Skip to Q 33

 Yes → **32.1 Date of transplant**  /  /   
day month year
**OR**  Unknown/not documented

**Section 4: Medical Care of Diabetes and Chronic Kidney Disease**
**33. How often does the participant monitor his/her diabetes with a blood glucose monitor? (select one option)**
 ≥ 3 times per day  Once per day (daily)  Once per week (weekly)  Uncertain  
 2 times per day  A few times per week  Rarely  Not documented

**34. Please indicate when the participant was last referred/seen by the following health professionals. (Select the appropriate response for each health professional).**

|                             | Not referred/reviewed by this health professional | 3 months or less         | 4-12 months ago          | 13-24 months ago         | As required              | Uncertain                |
|-----------------------------|---------------------------------------------------|--------------------------|--------------------------|--------------------------|--------------------------|--------------------------|
| a. Endocrinologist          | <input type="checkbox"/>                          | <input type="checkbox"/> | <input type="checkbox"/> | <input type="checkbox"/> | <input type="checkbox"/> | <input type="checkbox"/> |
| b. Nephrologist             | <input type="checkbox"/>                          | <input type="checkbox"/> | <input type="checkbox"/> | <input type="checkbox"/> | <input type="checkbox"/> | <input type="checkbox"/> |
| c. Diabetes Nurse Educator  | <input type="checkbox"/>                          | <input type="checkbox"/> | <input type="checkbox"/> | <input type="checkbox"/> | <input type="checkbox"/> | <input type="checkbox"/> |
| d. Renal Nurse Practitioner | <input type="checkbox"/>                          | <input type="checkbox"/> | <input type="checkbox"/> | <input type="checkbox"/> | <input type="checkbox"/> | <input type="checkbox"/> |
| e. Optometrist              | <input type="checkbox"/>                          | <input type="checkbox"/> | <input type="checkbox"/> | <input type="checkbox"/> | <input type="checkbox"/> | <input type="checkbox"/> |
| f. Ophthalmologist          | <input type="checkbox"/>                          | <input type="checkbox"/> | <input type="checkbox"/> | <input type="checkbox"/> | <input type="checkbox"/> | <input type="checkbox"/> |
| g. Podiatrist               | <input type="checkbox"/>                          | <input type="checkbox"/> | <input type="checkbox"/> | <input type="checkbox"/> | <input type="checkbox"/> | <input type="checkbox"/> |
| h. Dentist                  | <input type="checkbox"/>                          | <input type="checkbox"/> | <input type="checkbox"/> | <input type="checkbox"/> | <input type="checkbox"/> | <input type="checkbox"/> |
| i. Dietician                | <input type="checkbox"/>                          | <input type="checkbox"/> | <input type="checkbox"/> | <input type="checkbox"/> | <input type="checkbox"/> | <input type="checkbox"/> |
| j. Social Worker            | <input type="checkbox"/>                          | <input type="checkbox"/> | <input type="checkbox"/> | <input type="checkbox"/> | <input type="checkbox"/> | <input type="checkbox"/> |

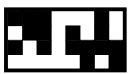

27311

Hospital ID:  Site Staff ID:  Participant ID:

**Section 5: Medications**

**35. Is the participant on Insulin?**

No → Skip to Q 36

Yes → **35.1 Is the participant on an Insulin pump?**  No  Yes

**35.2 What type of insulin? (select all that apply)**

Long acting  Short acting  Rapid acting  Basal

**36. Is the participant on diabetes tablets?**

No → Skip to Q 34

Yes → **Does the participant take:**

**36.1 Metformin?**  No  Yes

**36.2 Sulphonylurea?**  No  Yes

**36.3 Glitazone?**  No  Yes

**36.4 Acarbose?**  No  Yes

**36.5 Gliptin (DPP4 inhibitor)?**  No  Yes

**36.6 GLP1 agonist?**  No  Yes  
(e.g exenatide or liraglutide)

**36.7 SGLT2 inhibitors?**  No  Yes

**36.8 Other diabetes medication (please list below)**

**37. Other medications - is the participant taking:**

**37.1 ACE inhibitor?**  No  Yes

**37.2 Angiotensin2 Receptor Blocker?**  No  Yes

**37.3 Other Antihypertensives?**  No  Yes

**37.4 Statin?**  No  Yes

**37.5 Fibrate?**  No  Yes

**37.6 Erythropoieting Stimulating Agent?**  No  Yes

**37.7 Phosphate binder?**  No  Yes

**37.8 Iron Supplementation (IV or Oral)?**  No  Yes



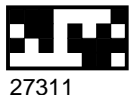

27311

Hospital ID:  Site Staff ID:  Participant ID: 

## Section 6: Investigations

38. Has a HbA1c test been performed in the last 3 months?  No  Yes

Please record the most recent HbA1c result

38.1 HbA1c   mmol/mol **and** 38.2  .  % → 38.3 Date of test  /  /    
day month year

39. Please enter details below of the most recent lipid profile results:

39.1 Total Cholesterol  .  mmol/L39.2 LDL Cholesterol  .  mmol/L39.3 HDL Cholesterol  .  mmol/L39.4 Triglycerides  .  mmol/L39.5 Date of test  /  /    
day month year**OR**  Not tested

40. Please enter details below of the most recent serum biochemistry profile results:

40.1 Potassium  .  mmol/L40.2 Creatinine     μmol/L40.3 Calcium  .  mmol/L40.4 Phosphate  .  mmol/L40.5 Parathyroid hormone (PTH)   .   
(result within last 6 months)40.5.1 Units  pmol/L  ng/L**OR**  Not done within  
the past 6 months40.6 eGFR   mL/min per 1.73m<sup>2</sup>40.7 Albumin   g/L40.8 Date of test  /  /    
day month year

(For PTH, please record result from within the past 6 months of this date)

**OR**  Not tested

41. Please record the most recent spot urine albumin / creatinine ratio (ACR):

   .  mg/mmol 40.1 Date of test  /  /    
day month year **OR**  Not tested

42. If you have used another method to measure microalbumin / proteinuria please record details below:

  .  42.1 Units  mg/L  mg/24hr  μg/min  g/mmol  g/L42.2 Date of test  /  /    
day month year **OR**  Not tested

43. Please enter the most recent Haemoglobin test result:

   g/L 43.1 Date of test  /  /    
day month year**OR**  Not tested

## The Summary of Diabetes Self- Care Activities for Diabetes and Kidney Disease

The questions below ask you about your diabetes and kidney disease self-care activities during the past 7 days. If you were sick during the past 7 days, please think back to the last 7 days that you were not sick.

### Diet

How many of the last SEVEN DAYS have you followed a healthful eating plan?

0 1 2 3 4 5 6 7

On average, **over the past month**, how many DAYS PER WEEK have you followed your eating plan?

0 1 2 3 4 5 6 7

On how many of the last SEVEN DAYS did you eat five or more servings of fruits and vegetables?

0 1 2 3 4 5 6 7

On how many of the last SEVEN DAYS did you eat high fat foods such as red meat or full-fat dairy products?

0 1 2 3 4 5 6 7

### Exercise

On how many of the last SEVEN DAYS did you participate in at least 30 minutes of physical activity? (Total minutes of continuous activity, including walking).

0 1 2 3 4 5 6 7

On how many of the last SEVEN DAYS did you participate in a specific exercise session (such as swimming, walking, biking) other than what you do around the house or as part of your work?

0 1 2 3 4 5 6 7

### Blood Sugar Testing

On how many of the last SEVEN DAYS did you test your blood sugar?

0 1 2 3 4 5 6 7

On how many of the last SEVEN DAYS did you test your blood sugar the number of times recommended by your health care provider?

0 1 2 3 4 5 6 7

**Foot Care**

On how many of the last SEVEN DAYS did you check your feet?

0 1 2 3 4 5 6 7

On how many of the last SEVEN DAYS did you inspect the inside of your shoes?

0 1 2 3 4 5 6 7

**Smoking**

Have you smoked a cigarette—even one puff—during the past SEVEN DAYS?

0. No

1. Yes.

If yes, how many cigarettes did you smoke on an average day?

Number of cigarettes: .....

**Medications**

On how many of the last SEVEN DAYS, did you take your recommended diabetes medication?

0 1 2 3 4 5 6 7

On how many of the last SEVEN days did you take your recommended insulin injections?

0 1 2 3 4 5 6 7

On how many of the last SEVEN days did you take your recommended number of diabetes pills?

0 1 2 3 4 5 6 7

Toobert et al. The Summary of Diabetes Self-Care Activities Measure. Diabetes Care, 23(7) July 2000: 943-950.

1  
2  
3  
4  
5  
6  
7  
8  
9  
10  
11  
12  
13  
14  
15  
16  
17  
18  
19  
20  
21  
22  
23  
24  
25  
26  
27  
28  
29  
30  
31  
32  
33  
34  
35  
36  
37  
38  
39  
40  
41  
42  
43  
44  
45  
46  
47  
48  
49  
50  
51  
52  
53  
54  
55  
56  
57  
58

---

# Your Health

– *and* –

# Well-Being

## Kidney Disease and Quality of Life (KDQOL™-36)

This survey asks for your views about your health. This information will help keep track of how you feel and how well you are able to do your usual activities.



***Thank you for completing these questions!***

# Study of Quality of Life For Patients on Dialysis

---

---

## What is the purpose of the study?

This study is being carried out in cooperation with physicians and their patients. The purpose is to assess the quality of life of patients with kidney disease.

## What will I be asked to do?

For this study, we want you to complete a survey today about your health, how you feel and your background.

## Confidentiality of information?

We do not ask for your name. Your answers will be combined with those of other participants in reporting the findings of the study. Any information that would permit identification of you will be regarded as strictly confidential. In addition, all information collected will be used only for purposes of the study, and will not be disclosed or released for any other purpose without your prior consent.

## How will participation benefit me?

The information you provide will tell us how you feel about your care and further understanding about the effects of medical care on the health of patients. This information will help to evaluate the care delivered.

## Do I have to take part?

You do not have to fill out the survey and you can refuse to answer any question. Your decision to participate will not affect your opportunity to receive care.

# Your Health

This survey includes a wide variety of questions about your health and your life. We are interested in how you feel about each of these issues.

1. In general, would you say your health is: [Mark an  in the one box that best describes your answer.]

|                            |                            |                            |                            |                            |
|----------------------------|----------------------------|----------------------------|----------------------------|----------------------------|
| Excellent                  | Very good                  | Good                       | Fair                       | Poor                       |
| ▼                          | ▼                          | ▼                          | ▼                          | ▼                          |
| <input type="checkbox"/> 1 | <input type="checkbox"/> 2 | <input type="checkbox"/> 3 | <input type="checkbox"/> 4 | <input type="checkbox"/> 5 |

The following items are about activities you might do during a typical day. Does your health now limit you in these activities? If so, how much? [Mark an  in a box on each line.]

|                          |                             |                              |
|--------------------------|-----------------------------|------------------------------|
| Yes,<br>limited a<br>lot | Yes,<br>limited a<br>little | No, not<br>limited<br>at all |
|--------------------------|-----------------------------|------------------------------|

2. Moderate activities, such as moving a table, pushing a vacuum cleaner, bowling, or playing golf .....  1..... 2..... 3

3. Climbing several flights of stairs .....  1..... 2..... 3

**During the past 4 weeks, have you had any of the following problems with your work or other regular daily activities as a result of your physical health?**

|     |    |
|-----|----|
| Yes | No |
| ▼   | ▼  |

4. Accomplished less than you would like.....  1..... 2

5. Were limited in the kind of work or other activities .....  1..... 2

**During the past 4 weeks, have you had any of the following problems with your work or other regular daily activities as a result of any emotional problems (such as feeling depressed or anxious)?**

|     |    |
|-----|----|
| Yes | No |
| ▼   | ▼  |

6. Accomplished less than you would like.....  1..... 2

7. Didn't do work or other activities as carefully as usual .....  1..... 2

**8. During the past 4 weeks, how much did pain interfere with your normal work (including both work outside the home and housework)?**

|                            |                            |                            |                            |                            |
|----------------------------|----------------------------|----------------------------|----------------------------|----------------------------|
| Not at all                 | A little bit               | Moderately                 | Quite a bit                | Extremely                  |
| ▼                          | ▼                          | ▼                          | ▼                          | ▼                          |
| <input type="checkbox"/> 1 | <input type="checkbox"/> 2 | <input type="checkbox"/> 3 | <input type="checkbox"/> 4 | <input type="checkbox"/> 5 |

These questions are about how you feel and how things have been with you during the past 4 weeks. For each question, please give the one answer that comes closest to the way you have been feeling.

How much of the time during the past 4 weeks...

|        |        |        |        |          |        |
|--------|--------|--------|--------|----------|--------|
|        |        |        | A good |          |        |
| All    | Most   | bit    | Some   | A little | None   |
| of the   | of the |
| time   | time   | time   | time   | time     | time   |
| ▼      | ▼      | ▼      | ▼      | ▼        | ▼      |

9. Have you felt calm and peaceful?.....  1.....  2.....  3.....  4.....  5.....  6

10. Did you have a lot of energy? .....  1.....  2.....  3.....  4.....  5.....  6

11. Have you felt downhearted and blue? .  1.....  2.....  3.....  4.....  5.....  6

12. During the past 4 weeks, how much of the time has your physical health or emotional problems interfered with your social activities (like visiting with friends, relatives, etc.)?

|                            |                            |                            |                            |                            |
|----------------------------|----------------------------|----------------------------|----------------------------|----------------------------|
| All                        | Most                       | Some                       | A little                   | None                       |
| of the                     |
| time                       | time                       | time                       | time                       | time                       |
| ▼                          | ▼                          | ▼                          | ▼                          | ▼                          |
| <input type="checkbox"/> 1 | <input type="checkbox"/> 2 | <input type="checkbox"/> 3 | <input type="checkbox"/> 4 | <input type="checkbox"/> 5 |



# Your Kidney Disease

How true or false is each of the following statements for you?

|                 |             |            |              |                  |
|-----------------|-------------|------------|--------------|------------------|
| Definitely true | Mostly true | Don't know | Mostly false | Definitely false |
| ▼               | ▼           | ▼          | ▼            | ▼                |

13. My kidney disease interferes too much with my life .....

1 .....  2 .....  3 .....  4 .....  5

14. Too much of my time is spent dealing with my kidney disease .....

1 .....  2 .....  3 .....  4 .....  5

15. I feel frustrated dealing with my kidney disease .....

1 .....  2 .....  3 .....  4 .....  5

16. I feel like a burden on my family .....

1 .....  2 .....  3 .....  4 .....  5

**During the past 4 weeks, to what extent were you bothered by each of the following?**

|                        |                      |                        |                       |                       |
|------------------------|----------------------|------------------------|-----------------------|-----------------------|
| Not at all<br>bothered | Somewhat<br>bothered | Moderately<br>bothered | Very much<br>bothered | Extremely<br>bothered |
|------------------------|----------------------|------------------------|-----------------------|-----------------------|

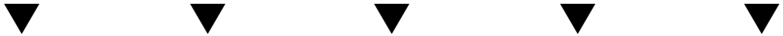

- 17. Soreness in your muscles?.....  1 .....  2 .....  3 .....  4 .....  5
- 18. Chest pain? .....  1 .....  2 .....  3 .....  4 .....  5
- 19. Cramps? .....  1 .....  2 .....  3 .....  4 .....  5
- 20. Itchy skin?.....  1 .....  2 .....  3 .....  4 .....  5
- 21. Dry skin?.....  1 .....  2 .....  3 .....  4 .....  5
- 22. Shortness of breath?.....  1 .....  2 .....  3 .....  4 .....  5
- 23. Faintness or dizziness?.....  1 .....  2 .....  3 .....  4 .....  5
- 24. Lack of appetite?...  1 .....  2 .....  3 .....  4 .....  5
- 25. Washed out or drained?.....  1 .....  2 .....  3 .....  4 .....  5
- 26. Numbness in hands or feet?.....  1 .....  2 .....  3 .....  4 .....  5
- 27. Nausea or upset stomach?.....  1 .....  2 .....  3 .....  4 .....  5
- 28<sup>a</sup>. (Hemodialysis patient only)  
Problems with your access site? ...  1 .....  2 .....  3 .....  4 .....  5
- 28<sup>b</sup>. (Peritoneal dialysis patient only)  
Problems with your catheter site?...  1 .....  2 .....  3 .....  4 .....  5

# Effects of Kidney Disease on Your Daily Life

Some people are bothered by the effects of kidney disease on their daily life, while others are not. How much does kidney disease bother you in each of the following areas?

|                        |                      |                        |                       |                       |
|------------------------|----------------------|------------------------|-----------------------|-----------------------|
| Not at all<br>bothered | Somewhat<br>bothered | Moderately<br>bothered | Very much<br>bothered | Extremely<br>bothered |
|------------------------|----------------------|------------------------|-----------------------|-----------------------|

|   |   |   |   |   |
|---|---|---|---|---|
| ▼ | ▼ | ▼ | ▼ | ▼ |
|---|---|---|---|---|

- 29. Fluid restriction?....  1 .....  2 .....  3 .....  4 .....  5
- 30. Dietary restriction?.  1 .....  2 .....  3 .....  4 .....  5
- 31. Your ability to work around the house? .....  1 .....  2 .....  3 .....  4 .....  5
- 32. Your ability to travel? .....  1 .....  2 .....  3 .....  4 .....  5
- 33. Being dependent on doctors and other medical staff?.....  1 .....  2 .....  3 .....  4 .....  5
- 34. Stress or worries caused by kidney disease? .....  1 .....  2 .....  3 .....  4 .....  5
- 35. Your sex life? .....  1 .....  2 .....  3 .....  4 .....  5
- 36. Your personal appearance? .....  1 .....  2 .....  3 .....  4 .....  5

*Thank you for completing these questions!*

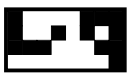

38371

Hospital ID:  Site Staff ID:  Participant ID:

Date  /  /   
day month year

**Patient Activation Measure (PAM) 13™** ©Insignia Health, LLC 2013

*Below are some statements that people sometimes make when they talk about their health. Please indicate how much you agree or disagree with each statement as it applies to you personally by crossing your answer. Your answers should be what is true for you and not just what you think others want you to say. If the statement does not apply to you, cross N/A. (Please choose only one response for each statement).*

|                                                                                                                            | Disagree Strongly        | Disagree                 | Agree                    | Agree Strongly           | N/A                      |
|----------------------------------------------------------------------------------------------------------------------------|--------------------------|--------------------------|--------------------------|--------------------------|--------------------------|
| 1. When all is said and done, I am the person who is responsible for taking care of my health                              | <input type="checkbox"/> |
| 2. Taking an active role in my own health care is the most important thing that affects my health                          | <input type="checkbox"/> |
| 3. I am confident that I can help prevent or reduce problems associated with my health                                     | <input type="checkbox"/> |
| 4. I know what each of my prescribed medications do                                                                        | <input type="checkbox"/> |
| 5. I am confident that I can tell whether I need to go to the doctor or whether I can take care of a health problem myself | <input type="checkbox"/> |
| 6. I am confident that I can tell a doctor concerns I have even when he or she does not ask                                | <input type="checkbox"/> |
| 7. I am confident that I can follow through on medical treatments I may need to do at home                                 | <input type="checkbox"/> |
| 8. I understand my health problems and what causes them                                                                    | <input type="checkbox"/> |
| 9. I know what treatments are available for my health problems                                                             | <input type="checkbox"/> |
| 10. I have been able to maintain (keep up with) lifestyle changes, like eating right or exercising                         | <input type="checkbox"/> |
| 11. I know how to prevent problems with my health                                                                          | <input type="checkbox"/> |
| 12. I am confident I can figure out solutions when new problems arise with my health                                       | <input type="checkbox"/> |
| 13. I am confident that I can maintain lifestyle changes, like eating right and exercising, even during times of stress    | <input type="checkbox"/> |

STROBE Statement—Checklist of items that should be included in reports of *cross-sectional studies*

|                              | Item No | Recommendation                                                                                                                                                                                                                                                                                                                                                                                             |
|------------------------------|---------|------------------------------------------------------------------------------------------------------------------------------------------------------------------------------------------------------------------------------------------------------------------------------------------------------------------------------------------------------------------------------------------------------------|
| <b>Title and abstract</b>    | 1       | (a) Indicate the study's design with a commonly used term in the title or the abstract (Page 2 and page 5)<br>(b) Provide in the abstract an informative and balanced summary of what was done and what was found (Page 2-abstract)                                                                                                                                                                        |
| <b>Introduction</b>          |         |                                                                                                                                                                                                                                                                                                                                                                                                            |
| Background/rationale         | 2       | Explain the scientific background and rationale for the investigation being reported (Page 4 to 5 of the background)                                                                                                                                                                                                                                                                                       |
| Objectives                   | 3       | State specific objectives, including any prespecified hypotheses (Stated on page 5, second paragraph)                                                                                                                                                                                                                                                                                                      |
| <b>Methods</b>               |         |                                                                                                                                                                                                                                                                                                                                                                                                            |
| Study design                 | 4       | Present key elements of study design early in the paper (Page 5, under methods)                                                                                                                                                                                                                                                                                                                            |
| Setting                      | 5       | Describe the setting, locations, and relevant dates, including periods of recruitment, exposure, follow-up, and data collection (Page 5, under methods)                                                                                                                                                                                                                                                    |
| Participants                 | 6       | (a) Give the eligibility criteria, and the sources and methods of selection of participants (Page 5, lines 18-24)                                                                                                                                                                                                                                                                                          |
| Variables                    | 7       | Clearly define all outcomes, exposures, predictors, potential confounders, and effect modifiers. Give diagnostic criteria, if applicable (Page 6 to 7)                                                                                                                                                                                                                                                     |
| Data sources/<br>measurement | 8*      | For each variable of interest, give sources of data and details of methods of assessment (measurement). Describe comparability of assessment methods if there is more than one group (Page 6 and 7; health related quality of life and patient activation)                                                                                                                                                 |
| Bias                         | 9       | Describe any efforts to address potential sources of bias (Page 6 and 7, validated measures were used)                                                                                                                                                                                                                                                                                                     |
| Study size                   | 10      | Explain how the study size was arrived at                                                                                                                                                                                                                                                                                                                                                                  |
| Quantitative variables       | 11      | Explain how quantitative variables were handled in the analyses. If applicable, describe which groupings were chosen and why (Page 7 under data analysis)                                                                                                                                                                                                                                                  |
| Statistical methods          | 12      | (a) Describe all statistical methods, including those used to control for confounding (Page 7 to 8)<br>(b) Describe any methods used to examine subgroups and interactions (Page 8, lines 1 to 4)<br>(c) Explain how missing data were addressed (Page 8, line 13-15)<br>(d) If applicable, describe analytical methods taking account of sampling strategy (N/A)<br>(e) Describe any sensitivity analyses |
| <b>Results</b>               |         |                                                                                                                                                                                                                                                                                                                                                                                                            |
| Participants                 | 13*     | (a) Report numbers of individuals at each stage of study—eg numbers potentially eligible, examined for eligibility, confirmed eligible, included in the study, completing follow-up, and analysed (Page 8, line 13)<br>(b) Give reasons for non-participation at each stage<br>(c) Consider use of a flow diagram                                                                                          |
| Descriptive data             | 14*     | (a) Give characteristics of study participants (eg demographic, clinical, social) and information on exposures and potential confounders (Page 8, line 15 to 22)<br>(b) Indicate number of participants with missing data for each variable of interest (Page 8, line 15 to 16)                                                                                                                            |

|                          |     |                                                                                                                                                                                                                       |
|--------------------------|-----|-----------------------------------------------------------------------------------------------------------------------------------------------------------------------------------------------------------------------|
| Outcome data             | 15* | Report numbers of outcome events or summary measures                                                                                                                                                                  |
| Main results             | 16  | (a) Give unadjusted estimates and, if applicable, confounder-adjusted estimates and their precision (eg, 95% confidence interval). Make clear which confounders were adjusted for and why they were included (Page 9) |
|                          |     | (b) Report category boundaries when continuous variables were categorized                                                                                                                                             |
|                          |     | (c) If relevant, consider translating estimates of relative risk into absolute risk for a meaningful time period N/A                                                                                                  |
| Other analyses           | 17  | Report other analyses done—eg analyses of subgroups and interactions, and sensitivity analyses (Page 9, lines 14 to 22- subgroup analyses by gender)                                                                  |
| <b>Discussion</b>        |     |                                                                                                                                                                                                                       |
| Key results              | 18  | Summarise key results with reference to study objectives (Page 10, lines 1 to 10)                                                                                                                                     |
| Limitations              | 19  | Discuss limitations of the study, taking into account sources of potential bias or imprecision. Discuss both direction and magnitude of any potential bias (Page 12, lines page 12 to 16)                             |
| Interpretation           | 20  | Give a cautious overall interpretation of results considering objectives, limitations, multiplicity of analyses, results from similar studies, and other relevant evidence (page 10 to 11)                            |
| Generalisability         | 21  | Discuss the generalisability (external validity) of the study results (Page 12, lines 9 to 12)                                                                                                                        |
| <b>Other information</b> |     |                                                                                                                                                                                                                       |
| Funding                  | 22  | Give the source of funding and the role of the funders for the present study and, if applicable, for the original study on which the present article is based (Page 19, under funding)                                |

\*Give information separately for exposed and unexposed groups.

**Note:** An Explanation and Elaboration article discusses each checklist item and gives methodological background and published examples of transparent reporting. The STROBE checklist is best used in conjunction with this article (freely available on the Web sites of PLoS Medicine at <http://www.plosmedicine.org/>, Annals of Internal Medicine at <http://www.annals.org/>, and Epidemiology at <http://www.epidem.com/>). Information on the STROBE Initiative is available at [www.strobe-statement.org](http://www.strobe-statement.org).
