# Supplementary material for: Factors associated with patient activation in an Australian population with comorbid diabetes and chronic kidney disease: a cross-sectional study
Source: PubMed Central journal article supplement — BMJ Open. 2017 Oct 22;7(10):e017695. doi: 10.1136/bmjopen-2017-017695 (PMC5665291; doi:10.1136/bmjopen-2017-017695), 2017-10-22
Supplement: bmjopen-2017-017695supp003.pdf [file bmjopen-2017-017695supp003.pdf]

## The Summary of Diabetes Self- Care Activities for Diabetes and Kidney Disease

*The questions below ask you about your diabetes and kidney disease self-care activities during the past 7 days. If you were sick during the past 7 days, please think back to the last 7 days that you were not sick.*

### Diet

How many of the last SEVEN DAYS have you followed a healthful eating plan?

0      1      2      3      4      5      6      7

On average, **over the past month**, how many DAYS PER WEEK have you followed your eating plan?

0      1      2      3      4      5      6      7

On how many of the last SEVEN DAYS did you eat five or more servings of fruits and vegetables?

0      1      2      3      4      5      6      7

On how many of the last SEVEN DAYS did you eat high fat foods such as red meat or full-fat dairy products?

0      1      2      3      4      5      6      7

### Exercise

On how many of the last SEVEN DAYS did you participate in at least 30 minutes of physical activity? (Total minutes of continuous activity, including walking).

0      1      2      3      4      5      6      7

On how many of the last SEVEN DAYS did you participate in a specific exercise session (such as swimming, walking, biking) other than what you do around the house or as part of your work?

0      1      2      3      4      5      6      7

### Blood Sugar Testing

On how many of the last SEVEN DAYS did you test your blood sugar?

0      1      2      3      4      5      6      7

On how many of the last SEVEN DAYS did you test your blood sugar the number of times recommended by your health care provider?

0      1      2      3      4      5      6      7

**Foot Care**

On how many of the last SEVEN DAYS did you check your feet?

0      1      2      3      4      5      6      7

On how many of the last SEVEN DAYS did you inspect the inside of your shoes?

0      1      2      3      4      5      6      7

**Smoking**

Have you smoked a cigarette—even one puff—during the past SEVEN DAYS?

0. No

1. Yes.

If yes, how many cigarettes did you smoke on an average day?

Number of cigarettes: .....

**Medications**

On how many of the last SEVEN DAYS, did you take your recommended diabetes medication?

0      1      2      3      4      5      6      7

On how many of the last SEVEN days did you take your recommended insulin injections?

0      1      2      3      4      5      6      7

On how many of the last SEVEN days did you take your recommended number of diabetes pills?

0      1      2      3      4      5      6      7

Toobert et al. The Summary of Diabetes Self-Care Activities Measure. *Diabetes Care*, 23(7) July 2000: 943-950.
