# Supplementary material for: Factors associated with patient activation in an Australian population with comorbid diabetes and chronic kidney disease: a cross-sectional study
Source: PubMed Central journal article supplement — BMJ Open. 2017 Oct 22;7(10):e017695. doi: 10.1136/bmjopen-2017-017695 (PMC5665291; doi:10.1136/bmjopen-2017-017695), 2017-10-22
Supplement: bmjopen-2017-017695supp006.pdf [file bmjopen-2017-017695supp006.pdf]

**S1:** Characteristics of patients who did and did not participate in the study at one hospital site

|                     | <b>Responders</b> | <b>Non-responders</b> | <b>p-value</b> |
|---------------------|-------------------|-----------------------|----------------|
| Patient numbers (n) | 127               | 243                   |                |
| Age (SD)            | 66.6 (10.8)       | 68.9 (11.9)           | 0.06           |
| Gender (Female)     | 30.7              | 39.5                  | 0.10           |
| CKD stage (KDOQI %) |                   |                       |                |
| 3                   | 34.2              | 40.9                  |                |
| 4                   | 25.2              | 25.5                  |                |
| 5                   | 33.9              | 40.3                  | 0.37           |

KDOQI-Kidney Disease Outcomes Quality Initiative classification of stages of chronic kidney disease
