# Supplementary material for: Factors associated with patient activation in an Australian population with comorbid diabetes and chronic kidney disease: a cross-sectional study
Source: PubMed Central journal article supplement — BMJ Open. 2017 Oct 22;7(10):e017695. doi: 10.1136/bmjopen-2017-017695 (PMC5665291; doi:10.1136/bmjopen-2017-017695), 2017-10-22
Supplement: bmjopen-2017-017695supp007.pdf [file bmjopen-2017-017695supp007.pdf]

**S2: Univariable and multivariable regression model for factors associated with low activation in men with diabetes and chronic kidney disease**

| Variables                                | Univariable<br>B (95% CI) | Multivariable<br>B (95% CI) |
|------------------------------------------|---------------------------|-----------------------------|
| Age                                      | -0.11 (-0.32 to 0.12)     | -                           |
| <i>Health related quality of life</i>    |                           |                             |
| Symptom problem list                     | 0.12 (0.04 to 0.25)*      | -                           |
| Effects of kidney disease                | 0.04 (-0.05 to 0.13)      | -                           |
| Burden of kidney disease                 | 0.08 (0.01 to 0.15)*      | -                           |
| Physical composite summary               | 0.06 (-0.15 to 0.26)      | -                           |
| Mental composite summary                 | 0.23 (0.03 to 0.43)*      | 0.23 (0.02 to 0.44)*        |
| Duration of diabetes                     | 0.01 (-0.17 to 0.20)      | -                           |
| Duration of kidney disease               | 0.10 (-0.12 to 0.16)      | -                           |
| eGFR                                     | 0.03 (-0.12 to 0.16)      | -                           |
| <i>Body mass index</i>                   |                           |                             |
| Healthy weight <sup>1</sup>              | Ref                       | Ref                         |
| Overweight                               | -5.08 (-10.96 to 0.80)    | -                           |
| Obese                                    | 2.87 (-2.08 to 7.81)      | -                           |
| <i>Socioeconomic status <sup>2</sup></i> |                           |                             |
| Lower                                    | Ref                       | Ref                         |
| Lower middle                             | 0.41 (-5.04 to 5.85)      | -                           |
| Upper lower                              | -0.63 (-5.98 to 4.73)     | -                           |
| Upper middle                             | -2.23 (-7.37 to 2.92)     | -                           |
| Upper                                    | 4.65 (-1.04 to 10.33)*    | -                           |
| Self-care composite score                | 0.21 (0.01 to 0.40)*      | -                           |

\*p<0.05; \*\*p<0.01, \*\*\*p<0.001; 1-due to small numbers of underweight patients (N=2), the underweight group was combined with the healthy weight group for this analysis; 2-Socio-economic status was estimated using the Australian Bureau of Statistics data. Postcodes were coded according to the Index of Relative Social Disadvantage, a composite measure based on selected census variables, which include income, educational attainment and employment status.
