# Supplementary material for: Factors associated with patient activation in an Australian population with comorbid diabetes and chronic kidney disease: a cross-sectional study
Source: PubMed Central journal article supplement — BMJ Open. 2017 Oct 22;7(10):e017695. doi: 10.1136/bmjopen-2017-017695 (PMC5665291; doi:10.1136/bmjopen-2017-017695), 2017-10-22
Supplement: bmjopen-2017-017695supp008.pdf [file bmjopen-2017-017695supp008.pdf]

**S3: Univariable and multivariable regression model for factors associated with low activation in women with diabetes and chronic kidney disease**

| Variables                                | Univariable<br>B (95% CI) | Multivariable<br>B (95% CI) |
|------------------------------------------|---------------------------|-----------------------------|
| Age                                      | 0.02 (-0.21 to 0.26)      | -                           |
| <i>Health related quality of life</i>    |                           |                             |
| Symptom problem list                     | 0.21 (0.06 to 0.36)**     | 0.2 (0.05 to 0.35)**        |
| Effects of kidney disease                | 0.21 (0.09 to 0.33)**     | -                           |
| Burden of kidney disease                 | 0.18 (0.09 to 0.27)***    | -                           |
| Physical composite summary               | 0.45 (0.19 to 0.71)**     | -                           |
| Mental composite summary                 | 0.33 (0.05 to 0.60)*      | -                           |
| Duration of diabetes                     | -0.09 (-0.35 to 0.17)     | -                           |
| Duration of kidney disease               | 0.02 (-0.31 to 0.27)      | -                           |
| eGFR                                     | 0.27 (0.10 to 0.43)**     | 0.27 (0.11 to 0.44)**       |
| <i>Body mass index</i>                   |                           |                             |
| Healthy weight <sup>1</sup>              | Ref                       | Ref                         |
| Overweight                               | 4.85 (-4.75 to 14.40)     | -                           |
| Obese                                    | -0.66 (-7.00 to 6.87)     | -                           |
| <i>Socioeconomic status <sup>2</sup></i> |                           |                             |
| Lower                                    | Ref                       | Ref                         |
| Lower middle                             | -1.99 (-9.71 to 5.73)     | -                           |
| Upper lower                              | -3.33 (-11.03 to 4.38)    | -                           |
| Upper middle                             | -3.40 (-4.93 to 11.73)    | -                           |
| Upper                                    | 0.27 (-6.88 to 7.42)      | -                           |
| Self-care composite score                | 0.23 (-0.06 to 0.53)      | -                           |

p<0.05; \*\*p<0.01, \*\*\*p<0.001; 1-due to small numbers of underweight patients (N=2), the underweight group was combined with the healthy weight group for this analysis; 2-Socio-economic status was estimated using the Australian Bureau of Statistics data. Postcodes were coded according to the Index of Relative Social Disadvantage, a composite measure based on selected census variables, which include income, educational attainment and employment status.
